# Supplementary material for: Functional Analysis of FRIGIDA Using Naturally Occurring Variation in Arabidopsis thaliana
Source: bioRxiv or medRxiv preprint supplement (doi:10.1101/677468), 2019-06-30
Supplement: Supplementary file [file media-4.pdf]

**Supplementary Material 3.** DNA sequences of all *FRI* alleles cloned in this work.

>FRI\_Bil-7

GGATCCCAAACTAGTGCCGCCGAGTCCTTTGGGACACAGTTTCGCACTTATCATTGATTGGCAAGCAGTAACTCGC  
AAAATCCGCACCACCGTGAAACATACTCCGGCGCTGAACGCTAGACGCAAATCCATATTACTGCTGCAGAAAGACGGAG  
AGAACAAGAGACTGACCGATCATAAGAGAAGAGAGCTTCAAGGCTTCAGCTGATGAAGAATCAATGGCGGCGAGAGAGAG  
TGAGAATCGAGTAGTTACTGAGAGGAAGATGAAACGTATCTCCTGAGAAAAACGTAAGAGAGTTCGGTTTCAACAGTAT  
TTTTCTCGGCGGTCTTCAGATTTTCCGTCCAACCTCTCTCTTTCTCTTTTCAGTTTTTTTTTGCCCAATCACTCGTGGTAG  
GATTTTTTTATAAGAAAGTTACGAAAATGCCCTCTCGTGCTTAGAGAGATTCAATTCGTGAACATATAATATGCCGTGAA  
TATACCACCAACTCTTACTCGTACTCGCATGTGGTGCGTGCAATATACACGTGGTTTCAATCAACGGCTACGTTTTAC  
TGATAGGTGGCTCGTTTAGTTTTGCACTGCCCTTGGGTGCGCGTGACCAAGTCATTTTCCAATGTGTTTTAATATTTGT  
GAACTATTATTAATAAAAAAGCGAGCGACGTTGTTCTTTGATGAGGGAACGACCGTACGCTTGGCGACCTTCTCTGATTG  
CGTAGAGTCGTTTTCTTATTGGGCTTACCTAGTACCGTCAGCCACAATGTTTTCAATTTCTTTCCACCTAAAACTAAA  
AGTACTACAAGTCACAACCTAAACCAAGTACACAAGGATTTTATCATGGGATTATCGTGTGTTGAAGACTAAAAAGAGCA  
CACCATACCCCATTAGTGAGGTAGAGTAAGACAGTAACTTTTGGGTTTCAATACCGAGCAAGAACCGTTATTTGTG  
ATTAGACATGTTATAAACCACTGCTTTAGTGACTATTTAAAAACAATATATTACATGTCGTAATCATGCAACCTAACTATG  
TTTTCATTAATCAAATACAAAGAATAAAGAGAAAAAGTGCGTAGATTCAATATTTGGCATAGACTCAAAGAGTGTATAT  
ATATCTGACTTTTTATTAATTTATTAACACAAATACATATTTTATAAGCAAACCTATAAAAGCCCTAAACATATAATGA  
TTACCTCAAAGGAAAAAGTCGTTTTCTCCTAATTAAGATAGGTTACTTCTAATTAATATAATTTATGTGAACTTC  
ACAATATACAGTTCAATAAAATTTGGTAATTTGACCGATTTAAGGAGAGTGGAATTAGGGCTTCTGCAATCTTTTTCT  
TCGCCGCAATCTCATGTCCAATTATCCACCGACGGTGGCGGCGCAACCCACAACGACGGCGAATCCACTGCTGCAGCGAC  
ATCAATCTGAACAGCGACGAAGAGAATTACCGAAGATTGTCGAAACAGAGTCTACAAGTATGGACATTACGATCGGTCAA  
TCTAAGCAGCCTCAATTTTTGAAATCCATAGACGAATTAGCTGCGTTTTAGTTGCAGTGGAAACATTCAAACGCCAAT  
CGATGATCTTCAGAAGCACATCGAGTCAATCGAAAACGCAATTGATCCAAACTCGAGAGTAACGGCGTTGTCTCGCCG  
CGCGGAACAATAATTTCCATCAGCCGATGTTATCGCCTCCGCGGAACAATGTATCTGTAGAAACCACCGTCACTGTGAGC  
CAACCGTCTCAGGAGATTGTACCGGAGACGTCGAATAAACCGGAGGGGGGACGTATGTGTGAGTTGATGTGTAGCAAAGG  
TCTGCGTAAATACATATACGCGAATATCTCTGATCAAGCTAAGTTAATGGAAGAGATTCCTTCAGCTTTGAAATTGGCCA  
AGGAGCCAGCGAAGTTTGATTGGATTGATTGGCAAGTTTACTTACAAGGGCGTAGAGCATTTACTAAAGAGTCGCCT  
ATGAGCTCTGCGAGACAAGTTTCGCTTCTATACTGGAGTCTTTTCTTAATGCCTGATCGTGGTAAAGGGAAGGTGAA  
GATTGAGAGTTGGATTAAGATGAGGCGGAGACGGCTGCTGTTGCTTGGAGGAAAAGTTGATGACTGAAGGAGGATTAG  
CTGCGGCTGAGAAAATGGATGCAAGGGTTTGCTTTTACTAGTTGCTTGTGTTTGGTGTTCCTTCAAACCTTAGGAGTACA  
GATTTGCTGGATTTGATAAGGATGAGTGGTTCGAATGAGATTGCCGGTCTTTGAAAGCGGTACAGTTTCTTGCCCTAT  
GGTCTCAGTACCATATTTCTGTTCTCACTCGGTGAATTTCAATGCAAAGGTGGTTCCTTTGTTGACATCATCGACCAAC  
ATCAAGTTCCATCTTTGTTTTTCGATAAGCTTGATGGTATAAACTAGGAGAGCACATCAAATTTTAGAGTGCAATGACT  
GATTGAGCCAAATCCTAGCTAGAAATTAATCTGGAAGAAGCTTGAAGCTCAACCATAGGTTTTGGTACGAAATGTTG  
CTTGTCAGAACCAATGATAGGCTATTGCCTGAAATAGTGTTCCTGTGGTTTCCAATATTGGAAGTTAAAATCGTATG  
ACTTAGCTGTTGGATACTAATTAAGCTTAAGCAATGCCAAGCTAAGAAGTGGTACTTACACAATATTTCTATTGGTCATA  
GGTATAGTTGAATCAAGTATCAAGCGTGAATGCATATTGAAGCTCTTGAGATGGTTTATACCTTTGGCATGGAGGATAA  
GTTTTAGCTGCTCTAGTTCTAACTTCACTTAAAGATGAGCAAGGAGTCATTTGAGAGGGCAAACCGAAAGGCCAGT  
CACCGCTGGCATTGTATGAACCTTCCCTTGCACATTATGTACCTTATGAACTCTTATCATCATCTGAGTCTGACCA  
TTGATATATTTATTTCTCAACAGAAAGAAGCGGCTACAAAGCAGCTAGCTGTGTTATCATCAGTTATGCAAGTGTATGGAG  
ACTACAAGTTAGATCCTGCGAAAGAACTACCAGGATGGCAGATCAAAGAGCAAATGTTAGCTTGGAGAAAGACACTCT  
TCAGCTCGACAAAGAGATGGAAGAGAAAGCAAGATCTCTAGTTTAAATGGAGGAAGCCGCACTTCCAAGAGAATGTATA  
ACCAACAGATAAAACGTCCAAGGTTGTCACCCATGGAATGCCACCAGTAACTTCTTATCGTATTCTCTATCTACCGT  
GATAGAAGCTTTCCTAGTCAAAGAGACGATGACCAAGATGAAATATCAGCTCTTGTGAGTAGTTACCTCGGCCCGTCAAC  
ATCTTTTCTCATCGCTCAAGAAGATCCCCGGAATATATGTTTCCACTTCCACATGGTGGGTTAGGAAGAAGTGTATATG  
CATATGAACATCTGGCCCAAATTCATACTCTCCAGGTACGGACATAGACTTTCATCGACAGTACTCTCCGTCTTTGGTT  
CACGGACAGAGACATCCACTACAGTACTCTCCTCAATTCATGGACAACAACAGTTACCATATGGTATACAAAGGGTTTA  
CAGACATTCACCATCTGAAGAAAGATATTTGGGTTTATCCAATCAAAGGTCTCCTCGCAGTAACTCATATTAGACCCCA  
AATAGGAGGAATGTAATTTGTAACAAAGCTTTTTGTTTTGCTTAAAGTTAGTCAATTTAATTAACCTCCAAACAGTCTCAA  
AATTTAATTTAATGTTTGGGGCTTAAAGAATGCAAATTTTTGCTCTGTAATTGACATTTAAGATGCTAATGTTATTGC  
TTCAGAGTTTTAGTCAACCTCAGATACATCGATATCAATAGACCTCTGGCTCTTGGTCATCTGGATTCTCT  
TCATCTTCTGTCTCTGTTCTTCTGTTCTCGTTGCACTGCTCGAGCAATTGCGGATCCAACCTTGTGCTTACAGTTT

CCATGACACAAGCTTTTCCATGAATGTATTTATGTCCGCCTTCTTATCTTTCTTGAGGAaGATGAATTC

>FRI\_Ren-1

GGATCCCAAAATCTAGTGCCGCCGAGTCCTTTGGGACAGAGTTTCGCACTTATCATTTCGATTTCGGCAAGCAGTAACTCGC  
AAAATCCGCACCACCGTGAAACATACTCTGGCGCTGAACGCTAGACGCAAATCCATATTACTGCTGCAGAAAGACGGAG  
AGAACAAGAGACTGACCGATCATAAGAGAAGAGAGCTTCAAGGCTTCAGCTGATGAAGAATCAATGGCGGCGAGAGTGAG  
TGAGAATCGAGTAGTTACTGAGAGGAAGATGAAACGTATCTCCTGAGAAAAACGTAAGAGAGTTCGGTTTCAACAGTAT  
TTTTCTCGGCGGTCTTCAGATTTTCCGTCCAACCTCTCTCTTTCTCTTTTCAGTTTTTTTTTGCCCAATCACTCGTGGTAG  
GATTTTTTTATAAGAAAGTTACGAAAATGCCCTCTCGTGCTTAGAGAGATTCAATTCGTGCACATATAATATGCCGTGAA  
TATACCACCAACTCTTACTCGTACTCGCATGTGGTGCGTGCAATATACACGTGGTTTCAATCAACGGCTACGTTTTAC  
TGATAGGTGGCTCGTTTAGTTTTGCACTGCCCTTGGGTGCGCGTGACCAAGTCATTTTCCAATGTGTTTTAATATTTGT  
GAACTATTATTAATAAAAAAGCGAGCGACGTTGTTGCTTGATGAGGGAGCGACCGTACGCTTGGCGACCTTCTCTGATTG  
CGTAGAGTCGTTTTCTTATTGGGCTTACCTAGTACCGCCAGCCACAATGTTTTCAATTTCTTTCCACCTAAAACTAAA  
AGTACTACAAGTCACAACCTAAACCAAGTACACAAGGATTTTATCATGGGATTATCGTGTGTTGAAGACTAAAAAGAGCA  
CACCATACCCCATTAGTGAGGTAGAGTAAGACAGTAACTTTTGGGTTTCAATACCAGCAAGAACCGTTATTTGTG  
ATTAGACATGTTATAAACCACTGCTTTAGTGACTATTTAAAAACAATATATTACATGTCGTAATCATGCAACCTAACCCAC  
AACGACGGCGAATCCACTGCTGCAGCGACATCAATCTGAACAGCGACGAAGAGAATTACCGAAGATTGTCGAAACAGAGT  
CTACAAGTATGGACATTACGATCGGTCAATCTAAGCAGCCTCAATTTTTGAAATCCATAGAGGAATTAGCTGCGTTTTCA  
GTTGCAGTGGAAACATTCAAACGCCAATTTCGATGATCTTTCAGAAGCACATCGAGTCAATCGAAAACGCAATTGATTCCAA  
ACTCGAGAGTAACGGCGTTGTCCTCGCCGCGGGAACAATAATTTCCATCAGCCGATGTTATCGCCTCCGCGGAACAATG  
TATCTGTAGAAACCACCGTCACTGTGAGCCAACCGTCTCAGGAGATTGTACCGGAGACGTGCAATAAACCGGAGGGGGAA  
CGTATGTGTGAGTTGATGTGTAGCAAAGGTCTGCGTAAATACATATACGCGAATATCTCTGATCAAGCTAAGTTAATGGA  
AGAGATTCCTTCAGCTTTGAAATTGGCCAAGGAGCCAGCGAAGTTTGTATTGGATTGTATTGGCAAGTTTTACTTACAAG  
GGCGTAGAGCATTTACTAAAGAGTCGCCTATGAGCTCTGCGAGACAAGTTTCGCTTCTTATACTGGAGTCTTTCTTCTA  
ATGCCGTATCGTGGTAAAGGGAAGGTGAAGATTGAGAGTTGGATTAAGATGAGGCGGAGACGGCTGCTGTTGCTTGGAG  
GAAAAGGTTGATGACTGAAGGAGGATTAGCTGCGGCTGAGAAAATGGATGCAAGGGGTTTGCTTTACTAGTTGCTTGT  
TTGGTGTTCCTTCAAACCTTAGGAGTACAGATTTGCTGGATTTGATAAGGATGAGTGGTTTCAATGAGATTGCCGGTGCT  
TTGAAGCGTACAGTTTCTGTCCCTATGGTCTCAGGTACCATATTCTGTTCTCACTCGGTGAATTTTATTGCAAAGGT  
GGTTCCTTTTGTGACATCATCGACCAACATCAAGTTCCATCTTTGTTTTTCGATAAGCTTGATGGTATAAACTAGGAGA  
GCACATCAAATATTTAGAGTGCAATGACTGATTGAGCCAAATCCTAGCTAGAAATTAATCTGGAAAGAAGCTTGGAACTCT  
CAACCATAGGTTTTGGTACGAAATTGTTGCTTGTGAGAACCAATGATAGGCTATTGCCCTTGAATAGTGTTCCTTGTGG  
TTTCCAATATTGGAAGTTAAATCATATGACTTAGCTGTTGGATACTAATTAAGCTTAAGCAATGCCAACTCTAAGAAGT  
GGTACTTACACAATATTTCTATTGGTCATAGGTATAGTTGAATCAAGTATCAAGCGTGGAAATGCATATTGAAGCTTTGAA  
ATGGTTTATACCTTTGGCATGGAGGATAAGTTTTAGCTGCTCTAGTTCTAACTTCAATCTTAAAGATGAGCAAGGAGTC  
ATTTGAGAGGGGCAAAACGGAAAGCCAGTCACCGCTGGCATTGTATGAACCCTTCCCTTGCACATTATGTACCTTTATG  
AACTCTTATCATCATCTGAGTCTGACCATTGATATATTTATTTCTCAACAGAAAGAAGCGGCTACAAAGCAGCTAGCTG  
TGTTATCATCAGTTATGCAGTGTATGGAGACTACAAGTTAGATCCTGCGAAAAGAACTACCAGGATGGCAGATCAAAGAG  
CAAATTGTTAGCTTGGAGAAAGACTCTTCAGCTCGACAAAGAGATGGAAGAGAAAGCAAGATCTCTCAGTTAATGGA  
GGAAGCCGCACTTGCCAAGAGAATGTATAACCAACAGATAAAACGTCCAAGGTTGTCACCCATGGAAATGCCACCAGTAA  
CTTCTTATCATGATTCTCCTATCTACCGTGATAGAAGCTTTCTAGTCAAAGAGACGATGACCAAGATGAAATATCAGCT  
CTTGTGAGTAGTTACCTCGGCCGTCACATCTTTTCTCATCGCTCAAGAAGATCCCGGAATATATGGTTCCACTTCC  
ACATGGTGGGTTAGGAAGAAGGTATATGCATATGAACATCTGGCCCAAATTCATACTCTCCAGGTCACGGACATAGAC  
TTCATCGACAGTACTCTCGTCTTTGGTTCACGGACAGAGACATCCACTACAGTACTCTCTCCAATTCATGGACAACAA  
CAGTTACCATATGGTATACAAAAGGTTTACAGACATTCACCATCTGAAGAAAAGATATTTGGGTTtATCCAATCAAAGGT  
TCCTCGCAGTAACTCATATTAGACCCCAAATAGGAGGaaTGTAATTTGTAACAAAGCTTTTTGTTTTGCTTAAGTTA  
GTCATTTATTTAACTCCCAACAGTCTCAAAATTTAATTTAATGTTTGGGGCTTAAGAATGCAAAATTTTTGCTCTGTA  
ATTGACATTTAAGATGCTAATGTTATTGCTTCAGAGGTTTTAGTCAACCTCAGATACATCGATCACTATCTAAATAGA  
CCTCTGGCTCTTGGTCATCTGGATTCTTTCATCTTCTGTCTCTGTTCTTCTGTTCTCGTTGCACTGCTCGAGCAATT  
GCGGATTCACCTTGTGCTTACAGTTTCCCATGACACAaGCTTTTCCATGAATGTATTTATGTCCGCCTTCTTATCTTT  
CTTGAGGAAGATGAATTC

>FRI\_Alc-0

GGATCCCAAAATCTAGTGCCGCCGAGTCCTTTGGGACAGAGTTTCGCACTTATCATTTCGATTTCGGCAAGCAGTAACTCGCAAAA  
TCCGCACCACCGTGAAACATACTCTGGCGCTGAACGCTAGACGCAAAATCCATATTACTGCTGCAGAAAGACGGAGAGAACA  
AGAGACTGACCGATCATAAGAGAAGAGAGCTTCAAGGCTTCAGCTGATGAAGAATCAATGGCGGCGAGAGAGAGTGAGAA  
TCGAGTAGTTACTGAGAGGAAGATGAAACGTATCTCCTGAGAAAAACGTAAGAGAGTCCGTTTCAACAGTATTTTTCT  
CGGCGGTCTTCAGATTTCCGTCCAACCTCTCTTTCTCTTTTCAGTTTTTTTTGCCCCAATCACTCGTGGTAGGATTTT  
TTTATAAGAAAGTTACGAAAATGCCCTCTCGTGCTTAGAGAGATTCAATTCGTGCACATATAATATGCCGTGAATATACC  
ACCAACTCTTACTCGTACTCGCATGTGGTGCGTGAATATACACGTGGTTCGAATCAACGGCTACGTTTTACTGATAG  
GTGGCTCGTTAGTTTTGCACTGCCTTTGGGTGCGCGTGACCAAGTCATTTTCCAAATGTGTTTTGATATTTGAACTA  
TTATTAATAAAAAAGCGAGCGACGTTGTTCTTTGATGAGGGAACGACCGTACGTTGGCGACCTTCTGATTGCGTAGA  
GTCGTTTTCTTATTGGGCTTACCTAGTACCGTCAGCCACAATGTTTTCATTTCTTTCCACCTAAAACAAAAAGTACT  
CACAAGTCACAACCTAAACCAAGTACACAAGGATTTTATCATGGGATTATCGTGTGTTGAAGACTAAAAAGAGCACACCAT  
CACCCCCATTAGTGCAGGTAGAGTAAGACAGTAACTTTGGGTTTCAATTACCGAGCAAGAACCCTTATTTGTGATTAGA  
CATGTTATAAACCACTGCTTTAGTGACTATTTAAAAACAATATATTACATGTCGTAATCATGCAACCTAACTATGTTTTCA  
TTAATCAAATACAAAGAATAAAGAGAAAAAGTGCGTAGATTCAATTATTTGGCATAGACTCAAAAGAGTGTATATATATCT  
GACTTTTTATTAATTATTAACACAAAATACATATTTTATAAGCAAACTATAAAAGCCCTAAACATATAACGATTACCT  
CAAAGGAAAAAGTCGTTTTCTCCTAATTAAGATAGTTACTTCTAATTAATATATAATTTATGTGAACCTCACAAATA  
TACAGTTCAATAAAATTTGGTAATTTGACCGATTTAAGGAGAGTGGAAATTAGGGCTTCTGCAATCTTTTTCTCGCCG  
CAATCTCATGTCCAATTATCCACCGACGGTGGCGGCGCAACCCACAACGACGGCGAATCCACTGCTGCAGCGACATCAAT  
CTGAACAGCGACGAAGAGAATTACCGAAGATTGTGCAAAACAGAGTCTACAAGTATGGACATTACGATCGGTCAATCTAAG  
CAGCCTCAATTTTTGAAATCCATAGACGAATTAGCTGCGTTTTAGTTGCAAGTGGAAATATTCAAACGCCAATTCGATGA  
TCTTCAGAAGCACATCGAGTCAATCGAAAACGCAATTGATTCCAACTCGAGAGTAACGGCGTTGTCTCGCCGCGCGGA  
ACAATAATTTCCATCAGCCGATGTTATCGCCTCCGCGGAACAATGTATCTGTAGAAACCACCGTCACTGTGAGCCAACCG  
TCTCAGGAGATTGTACCGGAGACGTGAATAAACCGGAGGGGGGACGTATGTGTGAGTTGATGTGTAGCAAAGGTCTGCG  
TAAATACATATAGTCAATATCTCTGATCAAGCTAAGTTAATGGAAGAGATTCTTCAGCTTTGAAATTGGCCAAGGAGC  
CAGCGAAGTTGTATTGGATTGATTGGCAAGTTTTACTTACAAGGGCGTAGAGCATTTACTAAAGAGTCGCCTATGAGC  
TCTGCGAGACAAGTTTCGCTTCTTATACTGGAGTCTTTTCTTCAATGCCTGATCGTGGTAAAGGGAAGGTGAAGATTGA  
GAGTTGGATTAAAGATGAGGCGGAGACGGCTGCTGTTGCTTGGAGGAAAAGGTTGATGACTGAAGGAGGATTAGCTGCGG  
CTGAGAAAATGGATGCAAGGGGTTTGTCTTTACTAGTTGCTTGTGTTGGTGTCTTCAAACCTTAGGAGTACAGATTTG  
CTGGATTTGATAAGGATGAGTGGTTCGAATGAGATTGCCGGTGCTTTGAAGCGTCCACAGTTTCTTGTCCCTATGGTCTC  
AGGTACCATATTCTGTTCTCACTCGGTGAATTTCAATGCAAAGGTGGTTCCTTTGTTGACATCATCGACCAACATCAAG  
TTCCATCTTTGTTTTTCGATAAGCTTGATGGTATAAACTAGGAGAGCACATCAAATATTTAGAGTGAATGACTGATTGA  
GCCAAATCCTAGCTAGAAATTAATCTGGAAGAAGCTTGGAACTCTCAACCATAGGTTTTGGTACGAAATTGTTGCTTGT  
AGAACCAAATGATAGGCTATTGCCCTTGAATAGTGTCTTGTGGTTTTCCAATATTGGAAGTTAAATCGTATGACTTAG  
CTGTTGGATACTAATTAAGCTTAAGCAATGCCAACTCTAAGAAGTGGTACTTACACAATATTCTATTGGTCATAGGTATA  
GTTGAATCAAGTATCAAGCGTGGAAATGCATATTGAAGCTCTTGAGATGGTTTATACCTTTGGCATGGAGGATAAGTTTT  
AGCTGCTCTAGTTCTAACTTCAATCTTAAAGATGAGCAAGGAGTCAATTTGAGAGGGCAAAACGGAAGCCAGTACCCG  
TGGCATTGTATGAACCTTCCCTTGCACATTATGTACCTTTATGAACTCTTATCATCATCTGAGTCTGACCATTGATA  
TATTTATTTCTAACAGAAAGAAGCGGCTACAAAGCAGCTAGCTGTGTTATCATCAGTTATGCAGTGTATGGAGACTCAC  
AAGTTAGATCCTGCGAAAGAAGTACCAGGATGGCAGATCAAAGAGCAAATGTTAGCTTGGAGAAAGACACTCTTCAGCT  
CGACAAAGAGATGGAAGAGAAAGCAAGATCTCTCAGTTAATGGAGGAAGCCGCCTTGCCAAGAGAATGTATAACCAAC  
AGATAAAACGTCCAAGGTTGTCACCCATGGAAATGCCACCAGTAACTTCTTCATCGTATTCTCCTATCTACCGTGATAGA  
AGCTTTCCTAGTCAAAGAGACGATGACCAAGATGAAATACAGCTCTTGTGAGTAGTTACCTCGGCCCGTCAACATCTTT  
TCCTCATCGCTCAAGAAGATCCCGGAATATATGGTCCACTTCCACATGGTGGGTTAGGAAGAAGTGTATATGCATATG  
AACATCTGGCCCCAAATTCATACTCTCCAGGTCACGGACATAGACTTCATCGACAGTACTCTCCGCTTTGGTTCACGGA  
CAGAGACATCCACTACAGTACTCTCCTCAATTCATGGACAACAACAGTTACCATATGGTATACAAAGGGTTTACAGACA  
TTCACCATCTGAAGAAAGATATTTGGGTTTATCCAATCAAAGGTCTCCTCGCAGTAACTCATCATTAGACCCCAAATAG  
AGGAATGTAATTTGTAACAAAGCTTTTTGTTTTGCTTAAAGTTAGTCATTTATTTAACTCCCAACAGTCTCAAATTTA  
ATTTAATGTTTGGGGCTTAAAGATGCAAATTTTTGCTCCTGTAATTGACATTTAAGATGCTAATGTTATTGCTTCA  
GGTTTTAGTCAACCTCAGATACATCGATACACTATCTAAATAGACCTCTGGCTCTTGGTCACTGAGATTCTTTCATCT  
TCTGTCTCTGTTCTTCTTCTGTTCTGCTGCTGAGCAATTGCGGATTCCAACTTGTGCTTACAGTTTCCCATGA  
CACAAGCTTTCCATGAATGATTTATGTCCGCCTTCTTATCTTTCTGAGGAAGATGAATTC

>FRI\_Bg-2

GGATCCCAAATCTAGTGCCGCCGAGTCCTTTGGGACACAGTTTCGCACTTATCATTGATTGGCAAGCAGTAACTCGC  
AAAATCCGCACCACCGTGAAACATACTCCGGCGCTGAACGCTAGACGCAAAATCCATATTACAGCTGCAGAAAGACGGAG  
AGAACAAGAGACTGACCGATCATAAGAGAAGAGAGCTTCAAGGCTTCAGCTGATGAAGAATCAATGGCGGCGAGAGAGAG  
TGAGAATCGAGTAGTTACTGAGAGGAAGATGAAACGTATCTCCTGAGAAAAACGTAAGAGAGTCCGTTTCAACAGTAT  
TTTTCTCGGCGGTCTTCAGATTTCCGTCCAACCTCTCTCTTTCTCTTTTCTTTTGGCCCACTACTCGTGGTAGG  
ATTTTTATAAGAAAGTTACGAAAATGCCCTCTCGTGCTTAGAGAGATTCAATTCGTGCACATATAATATGCCGTGAATA  
TACCACCAACTCTTACTCGTACTCGCATGTGGTGCGTGCAATATATACGTGGTTTGAATCAACGGCTACGTTTTACTG  
ATAGGTGGCTCGTTAGTTTTGCACTGCCTTTGGGTGCGCGTGACCAAGTCATTTTCCAAATGTGTTTTAATATTTGTGA  
ACTATTATAAATAAAAAAGCGAGCGACGTTGTTCTTTGATGAGGGAACGACCGTACGCTTGGCGACCTTCTCTGATTGCG  
TAGAGTCGTTTTCTTATTGGGCTTACCTAGTACCGTCAGCCACAATGTTTTCAATTTCTTTCCACCTAAAACTAAAAAG  
TACTACAAGTCACAACCTAAACCAAGTACACAAGGATTTTATCATGGGATTATCGTGGTTGAAGACTAAAAAGAGCACA  
CCATCACCCCATTAGTGAGGTAGAGTAAGACAGTAACTTTGGGTTTCAATTACCGAGCAAGAACCGTTATTTGTGAT  
TAGACATGTTATAAACCACTGCTTTAGTGACTATTTAAAAACAATATATTACATGTCGTAATCATGCAACCTAACTATGTT  
TTCATTAATCAAATACAAAGAATAAAGAGAAAAGTGCCTAGATTCAATTTTGGCATAGACTCAAAAGAGTGTATATAT  
ATCTGACTTTTTATAAATTATTAACACAAATACATATTTTATAAGCAAACTATAAAAGCCCTAAACATATAACGATT  
ACCTCAAAGGAAAAAGTCGTTTTCTCCTAATTAAGATAGGTTACTTCTAATTAATATATAATTTATGTGAACCTCAC  
AATATACAGTTCAATAAAATTTGGTAATTTGACCGATTTAAGGAGAGTGGAATAGGGCTTCTGCAATCTTTTTCTTC  
GCCGCAATCTCATGTCCAATTATCCACCGACGGTGCGGCGCAACCCACAACGACGGCGAATCCACTGCTGCAGCGACAT  
CAATCTGAACAGCGACGAAGAGAATTACCGAAGATTGTCGAAACAGAGTCTACAAGTATGGACATTACGATCGGTCAATC  
TAAGCAGCCTCAATTTTTGAAATCCATAGACGAATTAGCTGCGTTTTTCAAGTTCAGTTCAGTGGAAACATTCAAACGCCAATTCG  
ATGATCTTCAGAAGCACATCGAGTCAATCGAAAACGCAATTGATTCCAACTCGAGAGTAACGGCGTTGCTCCTCGCCGCG  
CGGAACAATAATTTCCATCAGCCGATGTTATCGCTCCGCGGAACAATGTATCTGTAGAAACCACCGTCACTGTGAGCCA  
ACCGTCTCAGGAGATTGTACCGGAGACGTCGAATAAACCAGGGGGGAACGTATATGTGAGTTGATGTGTAGCAAAGGTC  
TGCGTAAATACATATACGCGAATATCTCTGATCAAGCTTAGTTAATGGAAGAGATTCCCTCAGCTTTGAAATTGGCCAAG  
GAGCCAGCGAAGTTGTATTGGATTGATTGGCAAGTTTACTTACAAGGGCGTAGAGCATTACTAAAGAGTCGCCTAT  
GAGCTCTGCGAGACAAGTTTCGCTTCTTATACTGGAGTCTTTTCTTCAATGCCTGATCGTGGTAAAGGGAAGGTGAAGA  
TTGAGAGTTGGATTAAGATGAGGCGGAGACGGCTGCTGTTGCTTGGAGGAAAAGGTTGATGACTGAAGGAGGATTAGCT  
GCGGCTGAGAAAATGGATGCAAGGGGTTTGTCTTTACTAGTTGCTTGTGTTGGTGTTCCTTCAAACCTTAGGAGTACAGA  
TTTGCTGGATTTGATAAGGATGAGTGGTTTCAATGAGATTGCCGGTGCCTTGAAGCGGTCACAGTTTCTTGTCCCTATGG  
TCTCAGGTACCATATTCTGTCTCACTCGGTGAATTTCAATGCAAAGGTGGTTCCCTTTTGTGACATCATCGACCAACATC  
AAGTTCCATCTTTGTTTTGATAAGCTTGATGGTACAACCTAGGAGAGCACATCAAATATTTAGAGTGAATGACTGAT  
TGAGCCAAATCCTAGCTAGAAATTAATCTGGAAAGAACTTGAACCTCAACCATAGGTTTTGGTACGAAATTTGTTGCTT  
GTCAGAACCAATGATAGGCTATTGCCTTGAATAGTGTCTTGTGGTTTCAATATTGGAAGTTAAATCATATGACT  
TAGCTGTTGGATACTAATTAAGCTTAAGCAATGCCAATCTAAGAAGTGGTACTTACACAATATTCTATTGGTCATAGGT  
ATAGTTGAATCAAGTATCAAGCGTGAATGCATATTGAAGCTCTTGAATGGTTTATACCTTTGGCATGGAGGATAAGTT  
TTCAGCTGCTCTAGTTCTAATCTTAAAGATGAGCAAGGAGTCAATTGAGAGGGGCAAAACGGAAAGCCAGTCAC  
CGCTGGCATTGATGAACCCTTCCCTTGACATTTATGACCTTTATGAACTCTTTATCATCATCTGAGTCTGACCATTG  
ATATATTTATTTCTCAACAGAAAGAAGCGGCTACAAAGCAGCTAGCTGTGTTATCATCAGTTATGCAGTGTATGGAGACT  
CACAAGTTAGATCCTGCGAAAGAACTACCAGGATGGCAGATCAAAGAGCAAATTGTTAGCTTGGAGAAAGACTCTTCA  
GCTCGACAAAGAGATGGAAGAGAAAGCAAGATCTCTCAGTTAATGGAGGAAGCCGCACTTGCCAAGAGAATGTATAACC  
AACAGATAAAACGTCCAAGGTTGTCAACCATGGAATGCCACCAGTAACTTCTTCATCGTATTCTCCTATCTACCCTGAT  
AGAAGCTTCTTAGTCAAAGAGACGATGACCAAGATGAAATATCAGCTCTTGTGAGTAGTTACCTCGGCCCGTCAACATC  
TTTTCTCATCGCTCAAGAAGATCCCCGGAATATATGGTTCCACTTCCACATGGTGGGTTAGGAAGAAGTGTATATGCAT  
ATGAACATCTGGCCCAAATTCATATTCTCAGGTCACGGACATAGACTTTCATCGACAGTACTCTCCGTCTTTGGTTTAC  
GGACAGAGACATCCACTACAGTACTCTCCTCAATTCATGGACAACAACAGTTACCATATGGTATACAAAGGGTTTACAG  
ACATTCACCATCTGAAGAAAGATATTTGGGTTTATCCAATCAAAGGTCTCCTCGCAGTAACTCATCATTAGACCCCAAAT  
AGGAGGAATGTAATTTGTAACAAAGCTTTTTGTTTTGCTTAAAGTTAGTCATTTATTAACCTCCCAACAGTCTCAAAT  
TTAATTTAATGTTTGGGGCTTAAAGAATGCAATTTTTTTGCTCCTGTAATTGACATTTAAGATGCTAATGTTATTGCTTC  
AGAGGTTTTAGTCAACCTCAGATACATCGATATCACTATCTAAATAGACCTCTGGCTCTTGGTCTATCTGGATTCTTTCA  
TCTTCTGTCTCTGTTCTTCTTGTCTGTTGCACTGCTCGAGCAATTGCGGATTCCAACCTTGTGCTTACAGTTTCCCA  
TGACACAAGCTTTTCCATGAATGTATTTATGTCCGCTTCTTATCTTTTGGAGGAAGATGAATTC

>FRI\_Cvi-0

GGATCCCAAAATCTAGTGCCGCCGAGTCCTTTGGGACAGAGTTTCGCACTTATCATTTCGATTTCGGCAAGCAGTAACTCGC  
AAAATCCGCACCACCGTGAAACATACTCTGGCGCTGAACGCTAGACGCAAAATCCATATTACTGCTGCAGAAAGACGGAG  
AGAACAAGAGACTGACCGATCATAAGAGAAGAGAGCTTCAAGGCTTCAGCTGATGAAGAATCAATGGCGGCGAGAGAGAG  
TGAGAATCGAGTAGTTACTGAGAGGAAGATGAAACGTATCTCCTGAGAAAAACGTAAGAGAGTTCGGTTTCAACAGTAT  
TTTTCTCGGCGGTCTTCAGATTTTCCGTCCAACCTCTCTCTTTCTCTTTTCAGTTTTTTTTTGCCCAATCACTCGTGGTAG  
GATTTTTTTATAAGAAAGTTACGAAAATGCCCTCTCGTGCTTAGAGAGATTCAATTCGTGCACATATAATATGCCGTGAA  
TATACCACCAACTCTTACTCGTACTCGCATGTGGTGGTGCATATACACGTGGTTTCAATCAACGGCTACGTTTTAC  
TGATAGGTGGCTCGTTTACTTTGCACTGCCCTTTGGGTGCGCGTGACCAAGTCATTTTCCAATGGGTTTTAATATTTGT  
GAACTATTATAAATAAAAAAGCGAGCGACGTTGTTCTTTGATGAGGGAACGACCGTACGCTTGGCGACCTTCTCTGATTG  
CGTAGAGTCGTTTTCTTATTGGGCTTACCTAGTACCGTCAGCCACAATGTTTTCATTTCTTTCCACCTAAAACTAAA  
AGTACTACAAGTACAACCTAAACCAAGTACACAAGGATTTTATCATGGGATTATCGTGTGTTGAAGACTAAAAAGAGCA  
CACCATCACCCCATAGTGAGGTAGAGTAAGACAGTAACTTTTGGGTTTCAATTTACCGAGCAAGAACCGTTATTTGTG  
ATTAGACATGTTATAAACCACTGCTTTAGTGACTATTTAAAAACAATATATTACATGTCGTAATCATGCAACCTAACTATG  
TTTTCACTAAACAAATACAAAGAATAAAGAGAAAAAGTGCCTAGATTCAATTTTGGCATAGACTCAAAAGAGTGTATAT  
ATATCTGACTTTTTATTAATTTATAAACACAAATACATATTTTATAAGCAAACTATAAAAGCCCTAAACATATAATGA  
TTACCTCAAAGGAAAAAGTCGTTTTCTCCTAATTAAGATAGTTACTTCTAATTAATAGTATATAATTTATGTGAAC  
TTCACAATATACAGTTCAATAAAATTTGGTAATTTGACCGATTTAAGGAGAGTGGAAATTAAGGCTTCTGCAATCTTTTT  
TCTTCGCGCAATCTCATGTCCAATTATCCACCGACGGTGGCGGCGCAAAACCACAACGACGGCGAATCCACTGCTGCAGC  
GACATCAATCTGAACAGCGACGAAGAGAATTACCGAAGATTGTCGAAACAGAGTCTACAAGTATGGACATTACGATCGGT  
CAATCTAAGCAGCCTCAATTTTTGAAATCCATAGACGAATTAGCTGCGTTTTTCAGTTGCAGTGGAAACATTCAAATGCCA  
ATTCGATGATCTTCAGAAGCACATCGAGTCAATCGAAAACGCAATTGATTCCAACTCGAGAGTAACGGCGTTGCTCTCG  
CCGCGCGGAACAATAATTTCCATCAGCCGATGTTATCGCCTCCGCGGAACAATGTATCTGTAGAAACCACCGTCACTGTG  
AGCCAACCGTCTCAGGAGATTGTACCGGAGACGTGCAATAAACCGGAGGGGGACGTATGTGTGAGTTGATGTGTAGCAA  
AGGTCTGCGTAAATACATATACGCGAATATCTGAAACAAGCTAAGTTAATGGAAGAGATTCTTCAGCTTTGAAATTTGG  
CCAAGGAGCCAGCGAAGTTTGTATTGGATTGTATTGGCAAGTTTACTTACAAGGGCGTAGAGCATTACTAAAGAGTCG  
CCTATGAGCTCTGCGAGACAAGTTTCGCTTCTTATACTGGAGTCTTTTTCTTCTAATGCCTGATCGTGGTTAAGGGAAGGT  
GAAGATTGAGAGTTGGATTAAGATGAGGCGGAGACGGCTGCTGTTGCTTGGAGGAAAAGTTGATGACTGAAGGAGGAT  
TAGCTGCGGCTGAGAAAATGGATGCAAGGGGTTTGTCTTTACTAGTTGCTTGTGTTTGGTGTTCCTTCAAACCTTTAGGAGT  
ACAGATTTGCTGGATTTGATAAGGATGAGTGGTTCGAATGAGATTGCCGGTGTCTTGAAGCGGTACAGTTTCTTGTCCC  
TATGGTCTCAGGTACCATATTCTGTTCTCACTCGGTGAATTTCAATGCAAAAGGTGGTTTCTTTTGTGACATCATCGACC  
AACATCAAGTTCATCTTTGTTTTCGATAAGCTTGATGGTATAAAGTAGGAGAGCACATCAAATATTTAGAGTGCAATG  
ACTGATTGAGCCAAATCTAGCTAGAAATTAATCTGGAAGAAGCTTGGAACTCTCAACCATAGGTTTTGGTACGAAATTTG  
TTGCTTGTGAGAACCAATGATAGGCTATTGCCCTGAAATAGTGTCTTGTGTTTCCAATATTGGAAGTTAAATCAT  
ATGACTTAGCTGTTGGATACTAATTAAGCTTAAGCAATGCCAAGCTTCAAGAAGTGGTACTTACACAATATTCTATTGGTC  
ATAGGTATAGTTGAATCAAGTATCAAGCGTGGAAATGCATATTGAAGCTCTTGAGATGGTTTATACCTTTGGCATGGAGGA  
TAAGTTTTAGCTGCTCTAGTTCTAACTTCAATCTTAAAGATGAGCAAGGAGTCATTTGAGAGGGCAAACGGAAAGCCC  
AGTCACCGCTGGCATTGTATGAACCTTCCCTTGCACATTATGTACCTTTATGAACTCTTTATCATCATCTGAGTCTGA  
CCATTGATATATTTATTTCTCAACAGCAAGAAGCGGCTACAAAGCAGCTAGCTGTGTTATCATCAGTTATGCAGTGTATG  
GAGACTACAAGTTAGATCTGCGAAAGAAGTACCAGGATGGCAGATCAAAGAGCAAATTTGTTAGCTTGGAGAAAGACAC  
TCTTCAGCTCGACAAAGAGATGGAAGAGAAAGCAAGATCTCTCAGTTAATGGAGGAAGCCGCACTTGCCAAGAGAATGT  
ATAACCAACAGATAAAACGTCCAAGGTTGTCACCCATGGAAATGCCACCAAGTAACTTCTTCATCGTATTCTCCTATCTAC  
CGTGATAGAAGCTTCTAGTCAAAGAGACGATGACCAAGATGAAATATCAGCTCTTGTGAGTAGTTACCTCGGCCCGTC  
AACATCTTTTCTCATCGCTCAAGAAGATCCCGGAATATATGGTCCACTTCCACATGGTGGGTTAGGAAGAAGTGTAT  
ATGCATATGAACATCTGGCCCCAAATTCATACTCTCCAGGTCACGGACATAGACTTTCATCGACAGTACTCTCCGTCTTTG  
GTTACGGACAGAGACATCCACTACAGTACTCTCTCCAATTCATGGACAACAACAGTTACCATATGGTATACAAAGGGT  
TTACAGACATTCACCATCTGAAGAAAGATATTTGGGTTTATCCAATCAAAGGTCTCTCGCAGTAACTCATCATTAGACC  
CCAAATAGGAGGAATGTAAATTTGTAACAAAGCTTTTTGTTTTGCTTAAAGTTAGTCATTTATTAACCTCCAACAGTCT  
CAAAATTTAATTTAATGTTTGGGGCTTAAAGATGCAAATTTTTTGTCTCTGTAATTGACATTTAAGATGCTAATGTTAT  
TGCTTCAAGAGGTTTTAGTCAACCTCAGATACATCGATATCACTATCTAAATAGACCTCTGGCTCTTGGTCTCTGGATT  
TCTTCATCTTCTGTCTCTGTTCTTCTTCTGTTCTCGTTGCACTGCTCGAGCAATTGCGGATTCACCTTGTGCTTACAGT  
TTCCCATGACACAAGCTTTTCCATGAATGATTTATGTCCGCCTTCTATCTTTCTTGGAGGAAGATGAATTC

>FRI\_NFA-8

GGATCCCAAAATCTAGTGCCGCCGAGTCCTTTGGGACAGAGTTTCGCACTTATCATTTCGATTTCGGCAAGCAGTAACTCGC  
AAAATCCGCACCACCGTGAAACATACTCTGGCGCTGAACGCTAGACGCAAAATCCATATTACTGCTGCAGAAAGACGGAG  
AGAACAAGAGACTGACCGATCATAAGAGAAGAGAGCTTCAAGGCTTCAGCTGATGAAGAATCAATGGCGGCGAGAGTGAG  
TGAGAATCGAGTAGTTACTGAGAGGAAGATGAAACGTATCTCCTGAGAAAAACGTAAGAGAGTTCGGTTTCAACAGTAT  
TTTTCTCGGCGGTCTTCAGATTTTCCGTCCAACCTCTCTCTTTCTCTTTTCAGTTTTTTTTTGCCCAATCACTCGTGGTAG  
GATTTTTTTATAAGAAAGTTACGAAAATGCCCTCTCGTGCTTAGAGAGATTCAATTCGTGCACATATAATATGCCGTGAA  
TATACCACCAACTCTTACTCGTACTCGCATGTGGTGCCTGCAATATACACGTGGTTTCAATCAACGGCTACGTTTTAC  
TGATAGGTGGCTCGTTTACTTTGCACTGCCCTTGGGTGCGCGTGACCAAGTCATTTTCCAATGTGTTTTAATATTTGT  
GAACTATTATAAAAAAGCGAGCGACGTTGTTCTTTGATGAGGGAACGACCGTACGCTTGGCGACCTTCTCTGATTG  
CGTAGAGTCGTTTTCTTATTGGGCTTACCTAGTACCGTCAGCCACAATGTTTTCATTTCTTTCCACCTAAAACTAAA  
AGTACTACAAGTCACAACCTAAACCAAGTACACAAGGATTTTATCATGGGATTATCGTGTGTTGAAGACTAAAAAGAGCA  
CACCATACCCCCATTAGTGAGGTAGAGTAAGACAGTAACTTTTGGGTTTCAATTTACCGAGCAAGAACCGTTATTTGTG  
ATTAGACATGTTATAAACCACTGCTTTAGTGACTATTTAAAAACAATATATTACATGTCGTAATCATGCAACCTAACTATG  
TTTTCATTAATCAAATACAAAGAATAAAGAGAAAAAGTGCGTAGATTCAATTTTGGCATAGACTCAAAGAGTGTATAT  
ATATCTGACTTTTTATTAATTTATAAACACAAATACATATTTTATAAGCAAACTATAAAAGCCCTAACATATAATGA  
TTACCTCAAAGGAAAAAGTCGTTTTCTCCTAATTAAGATAGGTTACTTCTAATTAATATAATTTATGTGAACCTC  
ACAATATACAGTTCAATAAAATTTGGTAATTTGACCGATTTAAGGAGAGTGGAATAGGGCTTCTGCAATCTTTTTCT  
TCGCCGCAATCTCATGTCCAATTATCCACCGACGGTGGCGGCGCAACCCACAACGACGGCGAATCCACTGCTGCAGCGAC  
ATCAATCTGAACAGCGACGAAGAGAATTACCGAAGATTGTCGAAACAGAGTCTACAAGTATGGACATTATGATCGGTCAA  
TCTAAGCAGCTCAATTTTTGAAATCCATAGACGAATTAGCTGCGTTTTAGTTGCAAGTGAACATTCAAACGCCAATT  
CGATGATCTTCAGAAGCACATCGAGTCAATCGAAAACGCAATTGATTCCAACTCGAGAGTAACGGCGTTgTCCTCGCCG  
CGCGGAACAATAATTTCCATCAGCCGATGTTATCGCTCCGCGGAACAATGTATCTGTAGAAACCACCGTACTGTGAGC  
CAACCGTCTCAGGAGATTGTACCGGAGACGTCGAATAAACCGGAGGGGGAACGTATGTGTGAGTTGATGTGTAGCAAAGG  
TCTGCGTAAATACATATACGCGAATATCTCTGATCAAGCTAAGTTAATGGAAGAGATTCCTTCAGCTTTGAAATTTGCCA  
AGGAGCCAGCGAAGTTGTATTGGATTGTATTGGCAAGTTTACTTACAAGGGCGTAGAGCATTACTAAAGAGTCGCT  
ATGAGCTCTGCGAGACAAGTTTCGCTTCTATACTGGAGTCTTTTCTTAATGCCTGATCGTGGTAAAGGGAAGGTGAA  
GATTGAGAGTTGGATTAAGATGAGGCGGAGACGGCTGCTGTTGCTTGGAGGAAAAGGTTGATGACTGAAGGAGGATTAG  
CTGCGGCTGAGAAAATGGATGCAAGGGGTTGCTTTTACTAGTTGCTTGTGTTTGGTGTCTTCAAACCTTAGGAGTACG  
GATTTGCTGGATTTTGATAAGGATGAGTGGTTCGAATGAGATTGCCGGTGTCTTGAAGCGGTACAGTTTCTTGTCCCTA  
TGGTCTCAGGTACCATATTCTGTTCTCACTCGGTGAATTTTATTGCAAAGGTGGTTCCTTTTGTGACATCATCGACCAA  
CATCAAGTTCCATCTTTGTTTTGATAAGCTTGATGGTATAAAGTGGAGAGCACATCAAATATTTAGAGTGCAATGAC  
TGATTGAGCCAAATCCTAGCTAGAAATTAATCTGGAAGAAGTGGAACTCTCAACCATAGTTTTGGTACGAAATTTGT  
GCTTGTGAGAACCAATGATAGGCTATTGCCTTGAATAGTGTCTTGTGGTTTCCAATATTGGAAGTTAAATCATAT  
GACTTAGCTGTTGGATACTAATTAAGCTTAAGCAATGCCAAGTCTAAGAAGTGGTACTTACACAATATTCTATTGGTCA  
AGGTATAGTTGAATCAAGTATCAAGCGTGGAAATGCATATTGAAGCTCTTGAATGGTTTATACCTTTGGCATGGAGGATA  
AGTTTTAGCTGCTCTAGTTCTAATTTCAATCTTAAAGATGAGCAAGGAGTCAATTTGAGAGGGCAAACGGAAAGCCAG  
TCACCGCTGGCATTGTATGAACCTTCCCTTGCACATTATGTACCTTTATGAACTCTTTATCATCATCTGAGTCTGACC  
ATTGATATATTTATTTCTCAACAGAAAAGCGGCTACAAAGCAGCTAGCTGTGTTATCATCAGTTATGCAGTGTATGGA  
GACTACAAGTTAGATCCTGCGAAAAGAACTACCAGGATGGCAGATCAAAGAGCAAATTTGTTAGCTTGGAGAAAGACTC  
TTCAGCTCGACAAAGAGATGGAAGAGAAAGCAAGATCTCTCAGTTAATGGAGGAAGCCGCACTTGCCAAGAGAATGTAT  
AACCAACAGATAAAACGTCCAAGGTTGTACCCATGGAAATGCCACCAGTAACTTCTTCATCGTATTCTCCTATCTACCG  
TGATAGAAGCTTTCCTAGTCAAAGAGACGATGACCAAGATGAAATATCAGCTCTTGTGAGTAGTTACCTCGGCCCGTCAA  
CATTTTTCTCATCGCTCAAGAAGATCCCGGAATATATGGTCCACTTCCACATGGTGGGTTAGGAAGAAGTGTATAT  
GCATATGAACATCTGGCCCCAATTCATATTCTCCAGGTACGGACATAGACTTCATCGACAGTACTTCCGCTTTGGT  
TCACGGACAGAGACATCCACTACGTAAGTACTCTCCTCAATTCATGGACAACAACAGTTACCATATGGTATACAAAGGGTT  
ACAGACATTCACCATCTGAAGAAAAGATATTTGGGTTtATCCAATCAAAGGTCTCCTCGCAGTAACTCATCATTAGACCC  
AAATAGGAGGAATGTAATTTGTAACAAAGCTTTTTGTTTTGCTTAAGTTAGTCATTTATTTAACTCCCAACAGTCTCA  
AAATTTAATTTAATGTTTGGGGCTTAAAGAATGCAAATTTTTTGTCTCTGTAATTGACATTTAAGATGCTAATGTTATTG  
CTTCAGAGTTTTAGTCAACCTCAGATACATCGATATCACTATCTAAATAGACCTCTGGCTCTTGGTTCATCTGGATTCTC  
TTCATCTTGTCTCTGTTCTTCTTGTCTGCTGCTCGAGCAATTGCGGATTCCAACCTTGTGCTTACAGTTT  
CCCATGACACAAGCTTTTCCATGAATGTATTATGTCCGCTTCTTATCTTTCTTGGAGGAAGATGAATTC

GGATCCCAAAATCTAGTGCCGCCGAGTCCTTTGGGACACAGTTTCGCACTTATCATTGATTGGCAAGCAGTAACTCGCAAAA  
TCCGCACCACCGTGAAACATACTCCGGCGCTGAACGCTAGACGCAAAATCCATATTACAGCTGCAGAAAAGACGGAGAGAACA  
AGAGACTGACCGATCATAAGAGAAGAGAGCTTCAAGGCTTCAGCTGATGAAGAATCAATGGCGGCGAGAGAGAGTGAGAAT  
CGAGTAGTTACTGAGAGGAAGATGAAACGTATCTCTGAGAAAAAACGTAAGAGAGTTCCGTTTCAACAGTATTTTTCTC  
GGCGGTCTTCAGATTTTCCGTCCAACCTCTCTCTTCTCTTTCAGTTTTTTTTGCCCAATCACTCGTGGTAGGATTTTTT  
ATAAGAAAGTTACGAAAATGCCCTCTCGTGCTTAGAGAGATTCAATTCGTGCACATATAATATGCCGTGAATATACCACC  
AACTCTTACTCGTACTCGCATGTGGTGCGTGCAATATACAGTGGTTTCAATCAACGGCTACGTTTTACTGATAGGTG  
GCTCGTTAGTTTTGCACTGCCTTTGGGTGCGCGTGACCAAGTCATTTTCAAATGTGTTTTAATATTTGTGAACATTA  
TTAATAAAAAAGCGAGCGACGTTGTTCTTTGATGAGGGAACGACCGTACGCTTGGCGACCTTCTCTGATTGCGTAGAGTC  
GTTTTCTTACTGGGCTTACCTAGTACCGTCAGCCACAATGTTTTCATTTCTTTCCACCTAAAACTAAAAGTACTCAC  
AAGTCACAACCTTAAACCAAGTACACAAGGATTTTATCATGGGATTATCGTGTGTTGAAGACTAAAAAGAGCACACCATCAC  
CCCCATTAGTGAGGTAGAGTAAGACAGTAACTTTTGGGTTTCAATTACCGAGCAAGAACCGTTATTTGTGATTAGACAT  
GTTATAAACCACTGCTTATGACTATTTAAACAATATATTACATGTCGTAATCATGCAACCTAACTATGTTTTCATT  
ATCAAATACAAAGAATAAAGAGAAAAGTGCCTAGATTCAATTATTTGGCATAGACTCAAAAGAGTGATATATATCTGAC  
TTTTATTAATTTAATAACACAAATACATATTTTATAAGCAAACTATAAAAGCCCTAAACATATAATGATTACCTCAA  
AGGAAAAAGTCGTTTTCTCCTAATTAAGATAGGTTACTTCTAATTAATAGTATATAATTTATGTGAACCTCACAAATA  
TACAGTTCAATAAAATTTGGTAATTTGACCGATTTAAGGAGAGTGGAATTAAGGCTTCTGCAATCTTTTTCTCGCCG  
CAATCTCATGTCCAATTATCCACCGACGGTGGCGGCGCAACCCACAACGACGGCGAATCCACTGCTGCAGCGACATCAAT  
CTGAACAGCGACGAAGAGAATTACCGAAGATTGTGCAAAACAGAGTCTACAAGTATGGACATTACGATCGGTCAATCTAAG  
CAGCCTCAATTTTTGAAATCCATAGACGAATTAGCTGCGTTTTAGTTGCAAGTGGAAACATTCAAATGCCAATTCGATGA  
TCTTCAGAAGCACATCGAGTCAATCGAAAACGCAATTGATTCAAACCTCGAGAGTAACGGCGTTGCTCTCGCCGCGCGGA  
ACAATAATTTCCATCAGCCGATGTTATCGCCTCCGCGGAACAATGTATCTGTAGAAAACACCGTCACTGTGAGCCAACCG  
TCTCAGGAGATTGTACCGGAGACGTGAATAAACCGGAGGGGGGACGTATGTGTGAGTTGATGTGTAGCAAAGGTCTGCG  
TAAATACATATACGCGAATATCTCTGAACAAGCTAAGTTAATGGAAGAGATTCTTTCAGCTTTGAAATTGGCCAAGGAGC  
CAGCGAAGTTGTATTGGATTGATTGGCAAGTTTTACTTACAAGGGCGTAGAGCATTTACTAAAGAGTCGCTATGAGC  
TCTGCGAGACAAGTTTCGCTTCTTATACTGGAGTCTTTTCTTCAATGCCTGATCGTGGTAAAGGGAAGGTGAAGATTGA  
GAGTTGGATTAAAGATGAGGCGGAGACGGCTGCTGTTGCTTGGAGGAAAAGGTTGATGACTGAAGGAGGATTAGCTGCGG  
CTGAGAAAATGGATGCAAGGGGTTTGTCTTACTAGTTGCTTGTGTTGGTGTCTTCAAACCTTAGGAGTACAGATTTG  
CTGGATTTGATAAGGATGAGTGGTTCGAATGAGATTGCCGTGCTTTGAAGCGTCCACAGTTTCTTGTCCCTATGGTCTC  
AGGTACCATATTCTGTtCTCACTCGGTGAATTTTATTGCAAAGGTGGTCTTTTTGTTGACATCATCGACCAACATCAAG  
TTCCATCTTTGTTTTTCGATAAGCTTGTGATGATAAACTAGGAGAGCACATCAAATATTTAGAGTGAATGACTGATTGA  
GCCAAATCCTAGCTAGAAATTAATCTGGAAGAAGCTTGAACCTCTCAACCATAGGTTTTGGTACGAAATTGTGCTTGT  
AGAACCAAATGATAGGCTATTGCCCTTGAATAGTGTCTTGTGGTTTTCAAATATTGGAAGTTAAATCATATGACTTAG  
CTGTTGGATACTAATTAAGCTTAAAGCAATGCCAAGCTTAAAGAAGTGGTACTTACACAATATTCTATTGGTCATAGGTATA  
GTTGAATCAAGTATCAAGCGTGGAAATGCATATTGAAGCTTGTGAGATGGTTTATACCTTTGGCATGGAGGATAAGTTTT  
AGCTGCTCTAGTTCTAACTTCAATCTTAAAGATGAGCAAGGAGTCAATTTGAGAGGGCAAAACGGAAGCCAGTACCCG  
TGTTGATGAACCTTCCCTTGCACATTATGTACCTTATGAACCTTTTATCATCATCTGAGTCTGACCATTTGATATATT  
TATTTCTCAACAGAAAGAAGCGGCTACAAAGCAGCTAGCTGTGTTATCATCAGTTATGCAGTGTATGGAGACTCAAGT  
TAGATCTGCGAAAGAAGTACCAGGATGGCAGATCAAAGAGCAAATTTGTTAGCTTGGAGAAAGACTCTTTCAGCTCGAC  
AAAGAGATGGAAGAGAAAGCAAGATCTCTCAGTTAATGGAGGAAGCCGCACTTGCCAAGAGAATGTATAACCAACAGAT  
AAAACGTCCAAGGTTGTACCCATGGAAATGCCACCAAGTAACTTCTTTCATCGTATTCTCCTATCTACCGTGATAGAAGCT  
TTCTAGTCAAAGAGACGATGACCAAGATGAAATATCAGCTCTTGTGAGTAGTTACCTCGGCCGTCACATCTTTTCT  
CATCGCTCAAGAAGATCCCCGGAATATATGTTTCCACTTCCACATGGTGGGTTAGGAAGAAGTGTATATGCATATGAACA  
TCTGGCCCCAAATTAATACTCTCCAGTACAGGACATAGACTTTCATCGACAGTACTCTCCGTCTTTGGTTACGGACAGA  
GACATCCACTACAGTACTCTCTCAAATTCATGGACAACAACAGTTACCATATGGTATACAAAGGGTTACAGACATTCA  
CCATCTGAAGAAAGATATTTGGGTTTATCCAATCAAAGGTCTCTCGCAGTAACTCATCATTAGACCCAAATAGGAGGA  
ATGTAATTTGTAACAAAGCTTTTTGTTTTGCTTAAAGTTAGTCATTTATTTAACTCCCAACAGTCTCAAATTTAATTT  
AATGTTTGGGGCTTAAAGAATGCAAATTTTTTGTCTCTGTAATTGACATTTAAGATGCTAATGTTATTGCTTCAGAGGT  
TTAGTCAACCTCAGATACATCGATATCACTATCTAAATAGACCTCTGGCTCTTGGTCATCTGGATTCTTTCATCTCTG  
TCTCTGTTCTTCTTGTCTCGTTGCACTGCTCGAGCAATTGCGGATTCCAACCTTGTGCTTACAGTTTCCCATGACACA  
AGCTTTTCCATGAATGATTTATGTCCGCTTCTTATCTTTCTTGGAGGAAGATGAATTC

>FRI\_An-1

GGATCCCAAAATCTAGTGCCGCCGAGTCCTTTGGGACAGAGTTTCGCACTTATCATTTCGATTTCGGCAAGCAGTAACTCGC  
AAAATCCGCACCACCGTGAAACATACTCTGGCGCTGAACGCTAGACGCAAAATCCATATTACTGCTGCAGAAAGACGGAG  
AGAACAAGAGACTGACCGATCATAAGAGAAGAGAGCTTCAAGGCTTCAGCTGATGAAGAATCAATGGCGGCGAGAGTGAG  
TGAGAATCGAGTAGTTACTGAGAGGAAGATGAAACGTATCTCCTGAGAAAAACGTAAGAGAGTCCGTTTCAACAGTAT  
TTTTCTCGGCGGTCTTCAGATTTTCCGTCCAACCTCTCTCTTTCTCTTTTCAGTTTTTTTTTGCCCAATCACTCGTGGTAG  
GATTTTTTTATAAGAAAGTTACGAAAATGCCCTCTCGTGCTTAGAGAGATTCAATTCGTGCACATATAATATGCCGTGAA  
TATACCACCAACTCTTACTCGTACTCGCATGTGGTGGTGCATATACACGTGGTTTCAATCAACGGCTACGTTTTAC  
TGATAGGTGGCTCGTTTAGTTTTGCACTGCCCTTGGGTGCGCGTGACCAAGTCATTTTCCAATGTGTTTTAATATTTGT  
GAACTATTATAAAAAAGCGAGCGACGTTGTTCTTTGATGAGGGAACGACCGTACGCTTGGCGACCTTCTCTGATTG  
CGTAGAGTCGTTTTCTTATTGGGCTTACCTAGTACCGTCAGCCACAATGTTTTCATTTCTTTCCACCTAAAACTAAA  
AGTACTCACAAGTCACAACCTAAACCAAGTACACAAGGATTTTATCATGGGATTATCGTGTGTTGAAGACTAAAAAGAGCA  
CACCATCACCCCATAGTGAGGTAGAGTAAGACAGTAACTTTTGGGTTTCAATTTACCGAGCAAGAACCGTTATTTGTG  
ATTAGACATGTTATAAACCACTGCTTTAGTGACTATTTAAAAACAATATATTACATGTCGTAATCATGCAACCTAACTATG  
TTTTCATTAATCAAATACAAAGAATAAAGAGAAAAAGTGCCTAGATTCAATTTTGGCAGACTCAAAGAGTGTATAT  
ATATCTGACTTTTTATTAATTTATAAACACAAATACATATTTTATAAGCAAACTATAAAAGCCCTAACATATAACGA  
TTACCTCAAAGGAAAAAGTCGTTTTCTCCTAATTAAGATAGGTTACTTCTAATTAATATAATTTATGTGAACCTC  
ACAATATACAGCTCAATAAAATTTGGTAATTTGACCGATTTAAGGAGAGTGGAATAGGGCTTCTGCAATCTTTTTCT  
TCGCCGCAATCTCATGTCCAATTATCCACCGACGGTGGCGGCGCAACCCACAACGACGGCGAATCCACTGCTGCAGCGAC  
ATCAATCTGAACAGCGACGAAGAGAATTACCGAAGATTGTCGAAACAGAGTCTACAAGTATGGACATTACGATCGGTCAA  
TCTAAGCAGCCTCAATTTTTGAAATCCATAGACGAATTAGCTGCGTTTTCAGTTGCAGTGGAACATTCAAACGCCAATT  
CGATGATCTTCAGAAGCACATCGAGTCAATCGAAAACGCAATTGATTCCAACTCGAGAGTAACGGCGTTGTCCTCGCCG  
CGCGGAACAATAATTTCCATCAGCCGATGTTATCGCATCCGCGGAACAATGTATCTGTAGAAACCACCGTCACTGTGAGC  
CAACCGTCTCAGGAGATTGTACCGGAGACGTCGAATAAACCGAGGGGGGACGTATGTGTGAGTTGATGTGTAGCAAAGG  
TCTGCGTAAATACATATACGCGAATATCTCTGATCAAGCTAAGTTAATGGAAGAGATTCCTTCAGCTTTGAAATTTGGCCA  
AGGAGCCAGCGAAGTTGTATTGGATTGATTGGCAAGTTTACTTACAAGGGCGTAGAGCATTACTAAAGAGTCGCT  
ATGAGCTCTGCGAGACAAGTTTCGCTTCTATACTGGAGTCTTTTCTTCAATGCCTGATCGTGGTAAAGGGAAGGTGAA  
GATTGAGAGTTGGATTAAGATGAGGCGGAGACGGCTGCTGTTGCTTGGAGGAAAAGGTTGATGACTGAAGGAGGATTAG  
CTGCGGCTGAGAAAATGGATGCAAGGGGTTGCTTTACTAGTTGCTTGTGTTTGGTGTCTTCAAACCTTAGGAGTACA  
GATTTGCTGGATTTGATAAGGATGAGTGGTTCGAATGAGATTGCCGGTCTTGAAGCGGTACACAGTTTCTGTCCCTAT  
GGTCTCAGGTACCATATTTCTGTTCTCACTCGGTGAATTTCAATGCAAAGGTGGTTCCTTTTGTGACATCATCGACCAAC  
ATCAAGTTCCATCTTTGTTTTGATAAGCTTGATGGTATAAACTAGGAGAGCACATCAAATATTTAGAGTGAATGACT  
GATTGAGCCAAATCCTAGCTAGAAATTAATCTGGAAAAGAACTTGAAGCTCAACCATAGGTTTTGGTACGAAATTTGTTG  
CTTGTGAGAACCAATGATAGGCTATTGCCTGAAATAGTGTCTTGTGTTTCCAATATTGGAAGTTAAAATCATATG  
ACTTAGCTGTTGGATACTAATTAAGCTTAAGCAATGCAACTCTAAGAAGTGGTACTTACACAATATTCTATTGGTCATA  
GGTATAGTTGAATCAAGTATCAAGCGTGAATGCATATTGAAGCTCTTGAGATGGTTTATACCTTTGGCATGGAGGATAA  
GTTTTAGCTGCTCTAGTTCTAACTTCACTTAAAGATGAGCAAGGAGTCATTTGAGAGGGCAAAACGGAAAGCCAGT  
CACCGCTGGCATTGTATGAACCTTCCCTTGCACATTATGTACCTTTATGAACTCTTATCATCATCTGAGTCTGACCA  
TTGATATATTTATTTCTCAACAGAAAGAAGCGGCTACAAAGCAGCTAGCTGTGTTATCATCAGTTATGCAAGTGTATGGAG  
ACTCACAAGTTAGATCTTGCTTTCTTCCATCTCTTTGTCGAGCTGAAGAGTGTCTTTCTCCAAGCTAACAAATTTGCTC  
TCAGTTAATGGAGGAAGCCGCACTTGCCAAGAGAATGTATAACCAACAGATAAAAACGTCCAAGGTTGTACCCCATGGAA  
ATGCCACCAGTAACTTCTCATCGTATTCTCCTATCTACCGTGATAGAAGCTTTCTAGTCAAAGAGACGATGACCAAGA  
TGAATATCAGCTCTTGAGTAGTACCTCGGCCCGTCAACATCTTTTCTCATCGCTCAAGAAGATCCCGGAATATA  
TGGTTCCACTTCCACATGGTGGGTTAGGAAGAAGTGTATATGCATATGAACATCTGGCCCCAAATTCATACTCTCCAGGT  
CACGGACATAGACTTCATCGACAGTACTCTCGTCTTTGGTTACCGGACAGAGACATCCACTACAGTACTCTCCTCCAAT  
TCATGGACAACAACAGTTACCATATGGTATACAAAGGTTTACAGACATTCACCATCTGAAGAAAGATATTTGGGTTTAT  
CCAATCAAAGGTCTCCTCGCAGTAACTCATCATTAGACCCCAATAGGAGGAATGTAAATTTGTAACAAAGCTTTTTGTT  
TTTGCTTAAGTTAGTCATTTATTAACCTCCAACAGTCTCAAAATTTAATTTAATGTTTGGGGCTTAAGAATGCAATTT  
TTTTGCTCCTGTAATTGACATTTAAGATGCTAATGTTATTGCTTACAGAGTTTTAGTCAACCTCAGATACATCGATATCA  
CTATCAAATAGACCTCTGGCTCTGGTCTGTTGATTCTCTTCTGCTCTGTTCTTCTTCTGTTCTGTTCTGTTCTGTTGAC  
TGCTCGAGCAATTGCGGATTCCAACCTTGTGCTTACAGTTTCCCATGACACAAGCTTTTCCATGAATGTATTTATGTCCG  
CCTTCTTATCTTTCTGAGGAAGATGAATTC

>FRI\_Pro-0





GGATCCCAAAATCTAGTGCCGCCGAGTCCTTTGGGACACAGTTTCGCACTTATCATTGATTGGCAAGCAGTAACTCGC  
AAAATCCGCACCACCGTGAAACATACTCCGGCGCTGAACGCTAGACGCAAATCCATATTACAGCTGCAGAAAGACGGAG  
AGAACAAGAGACTGACCGATCATAAGAGAAGAGAGCTTCAAGGCTTCAGCTGATGAAGAATCAATGGCGGCGAGAGAGAG  
TGAGAATCGAGTAGTTACTGAGAGGAAGATGAAACGTATCTCCTGAGAAAAACGTAAGAGAGTCCGTTTCAACAGTAT  
TTTTCTCGGCGGTCTTCAGATTTTCCGTCCAACCTCTCTCTTTCTCTTTTCAGTTTTTTTTTGCCCAATCACTCGTGGTAG  
GATTTTTTATAAGAAAGTTACGAAAATGCCCTCTCGTGCTTAGAGAGATTCAATTCGTGCACATATAATATGCCGTGAAT  
ATACCACCAACTCTTACTCGTACTCGCATGTGGTGCGTGCAATATACACGTGGTTTCAATCAACGGCTACGTTTTACT  
GATAGGTGGCTCGTTTAGTTTTGCACTGCCTTTGGGTGCGCGTGACCAAGTCATTTTCAAATGTGTTTTAATATTTGTG  
AACTATTATAAAAAAAGCGAGCGACGTTGTTCTTTGATGAGGGAACGACCGTACGCTTGGCGACCTTCTCTGATTGC  
GTAGAGTCGTTTTCTTATTGGGCTTACCTAGTACCGTACGCCACAATGTTTTCAATTTCTTTCCACCTAAAATAAAA  
GTACTCACAAGTCAACTTAAACCAAGTACACAAGGATTTTATCATGGGATTATCGTGTTGAAGACTAAAAAGAGCAC  
ACCATCACCCCATTAGTGACGGTAGAGTAAGACAGTAACTTTGGGTTTCAATATTACCGAGCAAGAACCCTTATTTGTGA  
TTAGACATGTTATAAACCACTGCTTTAGTGACTATTTAAAAACAATATATTACATGTCGTAATCATGCAACCTAACTATGT  
TTTCATTAATCAAATACAAAGAATAAAGAGAAAAAGTGCGTAGATTCAATTTATTTGGCATAGACTCAAAAGAGTGTATATA  
TATCTGACTTTTTATAAATTATAAACACAAATACATATTTTATAAGCAAACTATAAAAAGCCCTAAACATATAATGAT  
TACCTCAAAGGAAAAAGTCGTTTTCTCTAATTAAGATAGGTTACTTCTAATTAATAGTATATAATTTATGTGAAT  
TCACAATATACAGTtCAATAAAATTTGGTAATTTGACCGATTTAAGGAGAGTGGAAATTAGGGCTTCTGCAATCTTTTT  
CTTCGCCGAATCTCATGTCCAATTATCCACCGACGGTGGCGGCGCAACCCACAACGACGGCGAATCCACTGCTGCAGCG  
ACATCAATCTGAACAGCGACGAAGAGAATTACCGAAGATTGTGAAAACAGAGTCTACAAGTATGGACATTACGATCGGTC  
AATCTAAGCAGCCTCAATTTTTGAAATCCATAGACGAATTAGCTGCGTTTTAGTTGCAAGTGGAAACATTCAAATGCCAA  
TTCGATGATCTTCAGAAGCACATCGAGTCAATCGAAAACGCAATTTGATTTCAAACCTCGAGAGTAAACGGCTTGTCTCGC  
CGCGCGGAACAATAATTTCCATCAGCCGATGTTATCGCTCCGCGGAACAATGTATCTGTAGAAACCACCGTCACTGTGA  
GCCAACCGTCTCAGGAGATTGTACCGGAGACGTGAATAAACCGAGGGGGGACGTATGTGTGAGTTGATGTGTAGCAAA  
GGTCTGCGTAAATACATATACGCGAATATCTCTGAACAAGCTAAGTTAATGGAAGAGATTCTTCAGCTTTGAAATTTGGC  
CAAGGAGCCAGCGAAGTTTGTATTGGATTGTATTGGCAAGTTTTACTTACAAGGGCGTAGAGCATTTACTAAAGAGTCGC  
CTATGAGCTCTGCGAGACAAGTTTCGCTTCTATACTGGAGTCTTTTCTTAATGCCTGATCGTGGTAAAGGGAAGGTG  
AAGATTGAGAGTTGGATTAAGATGAGGCGGAGACGGCTGCTGTTGCTTGGAGGAAAAGGTTGATGACTGAAGGAGGATT  
AGCTGCGGCTGAGAAAATGGATGCAAGGGGTTTCTTTACTAGTTGCTTGTGTTTGGTGTCTTCAAACCTTAGGAGTA  
CAGATTTGCTGGATTTGATAAGGATGAGTGGTTGCAATGAGATTGCCGGTGTCTTGAAGCGGTCACAGTTTCTGTCCCT  
ATGGTCTCAGGTACCATATTCTGTTCTCACTCGGTGAATTTCAATGCAAAGGTGGTTCTTTTGTGACATCATCGACCA  
ACATCAAGTTCCATCTTTGTTTTTCGATAAGCTTGATGGTATAAACTAGGAGAGCACATCAAATATTTAGAGTGAATGA  
CTGATTGAGCCAAATCCTAGCTAGAAATTAATCTGGAAAGAAGTGGAACTCTCAACCATAGGTTTTGGTACGAAATTTGT  
TGCTTGTGCAACCAATGATAGGCTATTGCCTTGAATAGTGTGTTCTTGTGGTTTCCAATATTGGAAGTTAAAATCATA  
TGACTTAGCTGTTGGATACTAATTAAGCTTAAGCAATGCCAACTCTAAGAAGTGGTACTTACACAATATTCTATTGGTCA  
TAGGTATAGTTGAATCAAGTATCAAGCGTGGAAATGCATATTGAAGCTCTTGAGATGGTTTATACCTTTGGCATGGAGGAT  
AAGTTTTAGCTGCTCTAGTTCTAACTTCAATCTTAAAGATGAGCAAGGAGTCAATTTAGAGGGGCAAAACGGAAAGCCCA  
GTCACCGCTGGCATTGTATGAACCTTCCCTTGCACATTATGTACCTTTATGAACTTTTATCATCATCTGAGTCTGAC  
CATTGATATATTTATTTCTCAACAGAAAAGAGCGGCTACAAAGCAGCTAGCTGTGTTATCATCAGTTATGCAGTGTATGG  
AGACTCACAAGTTAGATCCTGCGAAAAGAACTACCAGGATGGCAGATCAAAGAGCAAATTTGTTAGCTTGGAGAAAGACT  
CTTCAGCTCGACAAAGAGATGGAAGAGAAAAGCAAGATCTCTCAGTTTAAATGGAGGAAGCCGCACTTCCAAGAGAATGTA  
TAACCAACAGATAAAAACGTCCAAGTTGTACCCATGGAAATGCCACCAGTAACTTCTTCATCGTATTCTCTATCTACC  
GTGATAGAAGCTTTCCTAGTCAAAGAGACGATGACCAAGATGAAATTATCAGCTCTTGTGAGTAGTTACCTCGGCCGCTC  
AACATCTTTTCTCATCGCTCAAGAAGATCCCGGAATATATGGTTCCACTTCCACATGGTGGGTTAGGAAGAAGTGTAT  
ATGCATATGAACATCTGGCCCCAAATTCATACTCTCCAGGTCACGGACATAGACTTTCATCGACAGTACTCTCCGCTTTG  
GTTACGGACAGAGACATCCACTACAGTACTCTCTCCAATTCATGGACAACAACAGTTACCATATGGTATACAAAGGGT  
TTACAGACATTCACCATCTGAAGAAAGATATTTGGGTTtATCCAATCAAAGGTCTCCTCGCAGTAACTCATCATTAGACC  
CCAAATAGGAGGAATGTAATTTGTAACAAAGCTTTTTGTTTTGCTTAAAGTTAGTCATTTATTAACCTCCAACAGTCT  
CAAAATTTAATTTAATGTTTGGGGCTTAAAGATGCAAATTTTTTGTCTCTGTAATTGACATTTAAGATGCTAATGTTAT  
TGCTTCAAGAGGTTTTAGTCAACCTCAGATACATCGATATCAATTAAGACCTCTGGCTCTTGGTCTCTGGATTC  
TCTTCATCTTCTGTCTCTGTTCTTCTGTTCTCGTTGCACTGCTCGAGCAATTGCGGATTCACCTTGTGCTTACAGT  
TTCCCATGACACAAGCTTTTCCATGAATGATTTATGTCCGCCTTCTATCTTTCTTGGAGGAAGATGAATTC

>FRI\_Bå1-2

GGATCCCAAAATCTAGTGCCGCCGAGTCCTTTGGGACAGAGTTTCGCACTTATCATTTCGATTTCGGCAAGCAGTAACTCGCA  
AAATCCGCACCACCGTGAACATACTCTGGCGCTGAACGCTAGACGCAAAATCCATATTACTGCTGCAGAAAGACGGAGA  
GAACAAGAGACTGACCGATCATAAGAGAAGAGAGCTTCAAGGCTTACAGCTGATGAAGAATCAATGGCGGCGAGAGTGAGT  
GAGAATCGAGTAGTTACTGAGAGGAAGATGAAACGTATCTCTGAGAAAAACGTAAGAGAGTTCCGTTTCAACAGTATT  
TTTCTCGGCGGTCTTCAGATTTTCCGTCCAACCTCTCTTTCTCTTTTCAGTTTTTTTTGCCCCAATCACTCGTGGTAGG  
ATTTTTTATAAGAAAAGTTACGAAAATGCCCTCTCGTGCTTAGAGAGATTCAATTCGTGCACATATAATATGCCGTGAAT  
ATACCACCAACTCTTACTCGTACTCGCATGTGGTGCGTGCAATATACACGTGGTTTCAATCAACGGCTACGTTTTACT  
GATAGGTGGCTCGTTTAGTTTTGACTGCCTTTGGGTGCGCGTGACCAAGTCATTTTCAAATGTGTTTTAATATTTGTG  
AACTATTATAAAAAAGCGAGCGACGTTGTTCTTTGATGAGGGAACGACCGTACGCTTGGCGACCTTCTCTGATTGC  
GTAGAGTCGTTTTCTTATTGGGCTTACCTAGTACCGTACGCCACAATGTTTTCAATTTCTTCCCACTAAAATAAAAA  
GTACTCACAAGTCAACTTAAACCAAGTACACAAGGATTTTATCATGGGATTATCGTGTTGAAGACTAAAAAGAGCAC  
ACCATCACCCCATTAGTGACGGTAGAGTAAGACAGTAACTTTGGGTTTCAATTTACCGAGCAAGAACCCTTATTTGTGA  
TTAGACATGTTATAAACCACTGCTTTAGTGACTATTTAAAAACAATATATTACATGTCGTAATCATGCAACCTAACTATGT  
TTTCATTAATCAAATACAAAGAATAAAGAGAAAAAGTGCCTAGATTCAATTTATTTGGCATAGACTCAAAAGAGTGTATATA  
TATCTGACTTTTATAAATTATAAACACAAATACATATTTTATAAGCAAACTATAAAAGCCCTAAACATATAATGAT  
TACCTCAAAGGAAAAAGTCGTTTTCTCTACTTAAAGATAGGTTACTTCTAATTAATATAATTTATGTGAACCTCA  
CAATATACAGTTCAATAAAATTTGGTAATTTGACCGATTTAAGGAGAGTGAAATTAGGGCTTCTGCAATCTTTTTCTT  
CGCCGCAATCTCATGTCCAATTATCCACCGACGGTGGCGGCGCAACCCACAACGACGGCGAATCCACTGCTGCAGCGACA  
TCAATCTGAACAGCGACGAAGAGAATTACCGAAGATTGTCGAAACAGAGTCTACAAGTATGGACATTACGATCGGTCAAT  
CTAAGCAGCTCAATTTTTGAAATCCATAGACGAATTAGCTGCGTTTTAGTTGACAGTGAAGAACATTCAAACGCCAATTC  
GATGATCTTCAGAAGCACATCGAGTCAATCGAAAACGCAATTGATTCCAACTCGAGAGTAACGGCGTTGCTCTCGCCGC  
GCGGAACAATAATTTCCATCAGCCGATGTTATCGCCTCCGCGGAACAATGTATCTGTAGAAACCACCGTCACTGTGAGCC  
AACCGTCTCAGGAGATTGTACCGGAGACGTCGAATAAACCGGAGGGGGGACGTATGTGTGAGTTGATGTGTAGCAAAGGT  
CTGCGTAAATACATATACGCGAATATCTCTGATCAAGCTAAGTTAATGGAAGAGATTCCCTCAGCTTTGAAATTGGCCAA  
GGAGCCAGCGAAGTTTGATTGGATTGTATTGGCAAGTTTTACTTACAAGGGCGTAGAGCATTACTAAAGAGTGCCTA  
TGAGCTCTGCGAGACAAGTTTCGTTCTTATACTGGAGTCTTTCTTCTAATGCCTGATCGTGGTAAAGGGAAGGTGAAG  
ATTGAGAGTTGGATTAAGATGAGGCGGAGACGGCTGCTGTTGCTTGGAGGAAAAGGTTGATGACTGAAGGAGGATTAGC  
TGCGGCTGAGAAAATGGATGCAAGGGGTTGCTTTACGAGTTGCTTGTGTTGGTTCCTTCAAACCTTAGGAGTACAG  
ATTTGCTGGATTGATAAGGATGAGTGGTTCGAATGGGATTGCCGGTCTTGAAGCGGTACAGTTTCTTGTCCCTATG  
GTCTCAGGTACCATATTTCTGTTCTCACTCGGTGAATTTCAATGCAAAGTGGTTTCTTTTGTGACATCATCGACCAACA  
TCAAGTTCCATCTTTGTTTTGATAAGCTTGATGGTATAAACTAGGAGAGCACATCAAATATTTAGAGTGAATGACTG  
ATTGAGCCAAATCCTAGCTAGAAATTAATCTGGAAGAAGCTTGAAGTCTCAACCATAGGTTTTGGTACGAAATTTGTC  
TTGTCAGAACCAATGATAGGCTATTGCCTGAAATAGTGTCTTGTGGTTTCCAATATTGGAAGTTAAATCGTATGA  
CTTAGCTGTTGGATACTAATTAAGCTTAAGCAATGCCAAGTCTAAGAAGTGGTACTTACACAATATTTCTATTGGTCTAG  
GTATAGTTGAATCAAGTATCAAGCGTGAATGCATATTGAAGCTCTTGAGATGGTTTATACCTTTGGCATGGAGGATAAG  
TTTTCAGCTGCTCTAGTTCTAACTTCAATCTTAAAGATGAGCAAGGAGTCAATTTGAGAGGGCAAAACGGAAAGCCAGTC  
ACCGTGGCATTGTATGAACCTTCCCTTGACATTATGTACCTTTATGAACTCTTATCATCATCTGAGTCTGACCAT  
TGATATATTTATTTCTCAACAGAAAGAAGCGGTACAAAGCAGCTAGCTGTGTTATCATCAGTTATGCAGTGTATGGAGA  
CTCACAAGTTAGATCCTGCGAAAGAAGTACCAGGATGGCAGATCAAAGAGCAAATGTTAGCTTGGAGAAAGACTCTT  
CAGCTCGACAAAGAGATGGAAGAGAAAGCAAGATCTCTCAGTTTAAATGGAGGAAGCCGCACTTGCCAAGAGAATGTATAA  
CCAACAGATAAAACGTCCAAGGTTGTCACCCATGGAAATGCCACCAGTAACTTCTTATCGTATTCTCCTATCTACCGTG  
ATAGAAGCTTTCTAGTCAAAGAGACGATGACCAAGATGAAATATCAGCTCTTGTGAGTAGTTACCTCGGCCCGTCAACA  
TCTTTTCTCATCGCTCAAGAAGATCCCCGGAATATATGGTTCCACTCCACATGGTGGGTTAGGAAGAAGTGTATATGC  
ATATGAACATCTGGCCCCAATTCATACTCTCCAGGTCACGGACATAGACTTCACTGACAGTACTCTCCGCTTTGGTTC  
ACGGACAGAGACATCCACTACAGTACTCTCCTCCAATTCATGGACAACAACAGTTACCATATGGTATACAAAGGGTTTAC  
AGACATTCACCATCTGAAGAAAGATATTTGGGTTTATCCAATCAAAGGTCTCCTCGCAGTAACTCATCATTAGACCCCAA  
ATAGGAGGAATGTAATTTGTAACAAAGCTTTTTGTTTTGCTTAAAGTTAGTCAATTTAATTAACCTCCAACAGTCTCAA  
ATTTAATTTAATGTTTGGGGCTTAAAGAATGCAAATTTTTTGTCTCTGTAATTGACATTTAAGATGCTAATGTTATTGCT  
TCAGAGGTTTTAGTCAACCTCAGATACATCGATATCACTATCAAATAGACCTCTGGCTCTTGGGTCATCTGGGATTCT  
CTTCATCCTCTGGTCTCGGTTCTTCTGTTCTCGTTGGCACTGCTCGAAGCAATTGGCGGA

>FRI\_Wa-1

GGATCCCAAAATCTAGTGCCGCCGAGTCCTTTGGGACACAGTTTCGCACTTATCATTTCGATTTCGGCAAGCAGTAACTCGC

AAAATCCGACCACCGTGAAACATACTCCGGCGCTGAACGCTAGACGCAAATCCATATTACAGCTGCAGAAAGACGGAG  
AGAACAAGAGACTGACCGATCATAAGAGAAGAGAGCTTCAAGGCTTCAGCTGATGAAGAATCAATGGCGGCGAGAGTGAG  
TGAGAATCGAGTAGTTACTGAGAGGAAGATGAAACGTATCTCCTGAGAAAAACGTAAGAGAGTCCGTTTCAACAGTAT  
TTTTCTCGGCGGTCTTCAGATTTTCCGTCCAACCTCTCTCTTTCTCTTTTCTTTTGTCCCAATCACTCGTGGTAG  
GATTTTTTTATAAGAAAGTTACGAAAATGCCCTCTCGTGCTTAGAGAGATTCAATTCGTGCACATATAATATGCCGTGAA  
TATACCACCAACTCTTACTCGTACTCGCATGTGGTGCCTGCAATATACACGTGGTTTCAATCAACGGCTACGTTTTAC  
TGATAGGTGGCTCGTTTAGTTTTGCACTGCCCTTGGGTGCGCGTGACCAAGTCATTTTCCAATGTGTTTTAATATTTGT  
GAACTATTATAAAAAAGCGAGCGACGTTGTTCTTTGATGAGGGAACGACCGTACGCTTGGCGACCTTCTCTGATTG  
CGTAGAGTCGTTTTCTTATTGGGCTTACCTAGTACCGTCAGCCACAATGTTTTCATTTCTTTCCACCTAAAACTAAA  
AGTACTACAAGTCACAACCTAAACCAAGTACACAAGGATTTTATCATGGGATTATCGAGTTTGAAGACTAAAAAGAGCA  
CACCATACCCCATAGTGAGGTAGAGTAAGACAGTAACTTTTGGGTTTCAATACCAGCAAGAACCGTTATTTGTG  
ATTAGACATGTTATAAACCACTGCTTTAGTGACTATTTAAAAAATATATTACATGTCGTAATCATGCAACCTAACTATG  
TTTTCATTAATCAAATACAAAGAATAAAGAGAAAAAGTGCCTAGATTCAATTTTGGCATAGACTCAAAGAGTGTATAT  
ATATCTGACTTTTTATTAATTTAAACACAAATACATATTTTATAAGCAAACCTATAAAAGCCCTAAAGATATAACGA  
TTACCTCAAAGGAAAAAGTCGTTTTCTCTAATTAAGATAGGTTACTTCTAATTAATATAATTTATGTGAACTTC  
ACAATATACAGTTCAATAAAATTTGGTAATTTGACCGATTTAAGGAGAGTGGAATTTGGGCTTCTGCAATCTTTTTCT  
TCGCCGCAATCTCATGTCCAATTATCCACCGACGGTGGCGGCGCAACCCACAACGACGGCGAATCCACTGCTGCAGCGAC  
ATCAATCTGAACAGCGACGAAGAGAATTACCGAAGATTGTCGAAACAGAGTCTACAAGTATGGACATTACGATCGGTCAA  
TCTAAGCAGCCTCAATTTTTGAAATCCATAGACGAATTAGCTGCGTTTTAGTTGCAAGTGAACATTCAAATGCCAATT  
CGATGATCTTCAGAAGCACATCGAGTCAATCGAAAACGCAATTGATCCAACTCGAGAGTAACGGCGTTGCTCCTCGCCG  
CGCGGAACAATAATTTCCATCAGCCGATGTTATCGCTCCGCGGAACAATGATCTGTAGAAACCACCGTCACTGTGAGC  
CAACCGTCTCAGGAGATTGTACCGGAGACGTCGAATAAACCGAGGGGGGACGTATGTGTGAGTTGATGTGTAGCAAAGG  
TCTGCGTAAATACATATACGCGAATATCTCTGAACAAGCTAAGTTAATGGAAGAGATTCTTCAGCTTTGAAATTTGCCA  
AGGAGCCAGCGAAGTTTGTATTGGATTGATTGGCAAGTTTACTTACAAGGGCGTAGAGCATTACTAAAGAGTCGCCT  
ATGAGCTCTGCGAGACAAGTTTCTTATACTGGAGTCTTTTCTTCAATGCCTGATCGTGGTAAAGGGAAGGTGAA  
GATTGAGAGTTGGATTAAGATGAGGCGGAGACGGCTGCTGTTGCTTGGAGGAAAAGGTTGATGACTGAAGGAGGATTAG  
CTGCGGCTGAGAAAATGGATGCAAGGGGTTTGTCTTTACTAGTTGCTTGTGTTTGGTGTCTTCAAACCTTAGGAGTACA  
GATTTGCTGGATTTTATAAGGATGAGTGGTTGCAATGAGATTGCCGGTCTTTGAAGCGGTCACAGTTTCTTGTCCCTAT  
GGTCTCAGGTACCATATTTCTGTTCTCACTCGGTGAATTTCAATGCAAAGGTGGTTCCTTTTGTGACATCATCGACCAAC  
ATCAAGTTCCATCTTTGTTTTTCGATAAGCTTGATGGTATAAACTAGGAGAGCACATCAAATATTTAGAGTGAATGACT  
GATTGAGCCAAATCCTAGCTAGAAATTAATCTGGAAGAAGCTTGAAGCTCTCAACCATAGGTTTTGGTACGAAATTTGTG  
CTTGTGAGAACCAATGATAGGCTATTGCCTTGAATAGTGTCTTGTGGTTTCCAATATTGGAAGTTAAAATCATATG  
ACTTAGCTGTTGGATACTAATTAAGCTTAAGCAATGCCAAGCTAAGAAGTGGTACTTACACAATATTCTATTGGTCATA  
GGTATAGTTGAATCAAGTATCAAGCGTGAATGCATATTGAAGCTCTTGAGATGGTTTATACCTTTGGCATGGAGGATAA  
GTTTTAGCTGCTCTAGTTCTAAGTCTTAAAGATGAGCAAGGAGTCATTTGAGAGGGCAAACCGAAAGCCAGT  
CACCGCTGGCATTGTATGAACCTTCCCTTGCACATTATGTACCTTTATGAACTCTTTATCATCATCTGAGTCTGACCA  
TTGATATATTTATTTCTCAACAGAAAGAAGCGGCTACAAAGCAGCTAGCTGTGTTATCATCAGTTATGCAGTGTATGGAG  
ACTACAAGTTAGATCCTGCGAAAAGAACTACCAGGATGGCAGATCAAAGAGCAAATGTTAGCTTGGAGAAAGACACTCT  
TCAGCTCGACAAAGAGATGGAAGAGAAAGCAAGATCTCTAGTTAATGGAGGAAGCCGCACTTCCAAGAGAATGTATA  
ACCAACAGATAAAACGTCCAAGGTTGTCACCCATGGAATGCCACCAGTAACTTCTTATCGTATTCTCTATCTACCGT  
GATAGAAGCTTCTAGTCAAAGAGACGATGACCAAGATGAAATATCAGCTCTTGTGAGTAGTTACCTCGGCCCGTCAAC  
ATCTTTCTCATCGCTCAAGAAGATCCCCGGAATATATGTTCCACTTCCACATGGTGGGTTAGGAAGAAGTGTATATG  
CATATGAACATCTGGCCCAAATTCATACTCTCCAGGTACGGACATAGACTTCAATCGACAGTACTCTCCGTCTTTGGTT  
CACGGACAGAGACATCCACTACAGTACTCTCTCCAATTCATGGACAACAACAGTTACCATATGGTATACAAAGGTTTA  
CAGACATTACCATCTGAAGAAAGATATTTGGGTTTATCCAATCAAAGGTCTCTCGCAGTAACTCATCATTAGACCCCA  
AATAGGAGGAATGTAATTTGTAACAAAGCTTTTTGTTTTGCTTAAAGTTAGTCATTTATTTAACTCCCAACAGTCTCAA  
AATTTAATTTAATGTTTGGGGCTTAAAGAATGCAATTTTTTCTCTGTAATTGACATTTAAGATGCTAATGTTATTGC  
TTCAGAGTTTTAGTCAACCTCAGATACATCGATATCAATAGACTCTGGCTCTTGGTCTATCTGGATTCTCT  
TCATCTTCTGTCTCTGTTCTTCTGTTCTCGTTGCACTGCTCGAGCAATTGCGGATCCAACCTTGTGCTTACAGTTTC  
CCATGACACAAGCTTTTCCATGAATGTATTTATGTCCGCTTCTTATCTTTCTTGGGAAGATGAATTC

>FRI\_Zdr-6

GGATCCCAAATCTAGTGCCGCGAGTCCTTTGGGACACAGTTTCGCACTTATCATTGATTGGCAAGCAGTAACTCGC



AAAATCCGACCACCGTGAACATACTCCGGCGCTGAACGCTAGACGCAAAATCCATATTACAGCTGCAGAAAGACGGAG  
AGAACAAGAGACTGACCGATCATAAGAGAAGAGAGCTTCAAGGCTTCAGCTGATGAAGAATCAATGGCGGCGAGAGTGAG  
TGAGAATCGAGTAGTTACTGAGAGGAAGATGAAACGTATCTCCTGAGAAAAACGTAAGAGAGTCCGTTTCAACAGTAT  
TTTTCTCGGCGGTCTTCAGATTTCCGTCCAACCTCTCTCTTTCTCTTTCCAGTTTTTTTTGCCCAATCACTCGTGGTAG  
GATTTTTTTATAAGAAAGTTACGAAAATGCCCTCTCGTGCTTAGAGAGATTCAATTCGTGCACATATAATATGCCGTGAA  
TATACCACCAACTCTTACTCGTACTCGCATGTGGTGCCTGCAATATACACGTGGTTTCAATCAACGGCTACGTTTTAC  
TGATAGGTGGCTCGTTTAGTTTTGCACTGCCCTTGGGTGCGCGTGACCAAGTCATTTTCAAATGTGTTTTAATATTTGT  
GAACTATTATAAAAAAGCGAGCGACGTTGTTCTTTGATGAGGGAACGACCGTACGCTTGGCGACCTTCTCTGATTG  
CGTAGAGTCGTTTTCTTATTGGGCTTACCTAGTACCGTCAGCCACAATGTTTTCATTTCTTTCCACCTAAAACTAAA  
AGTACTACAAGTCACAACCTAAACCAAGTACACAAGGATTTTATCATGGGATTATCGAGTTTGAAGACTAAAAAGAGCA  
CACCATACCCCATAGTGAGGTAGAGTAAGACAGTAACTTTTGGGTTTCAATACCAGCAAGAACCGTTATTTGTG  
ATTAGACATGTTATAAACCACTGCTTTAGTGACTATTTAAAAAATATATTACATGTCGTAATCATGCAACCTAACTATG  
TTTTCATTAATCAAATACAAAGAATAAAGAGAAAAAGTGCCTAGATTCAATTTTGGCATAGACTCAAAGAGTGTATAT  
ATATCTGACTTTTTATTAATTTAAACACAAATACATATTTTATAAGCAAACTATAAAAGCCCTAAAGATATAACGA  
TTACCTCAAAGGAAAAAGTCGTTTTCTCTAATTAAGATAGGTTACTTCTAATTAATATAATTTATGTGAACTTC  
ACAATATACAGTTCAATAAAATTTGGTAATTTGACCGATTAAGGAGAGTGGAATTTGGGCTTCTGCAATCTTTTTCT  
TCGCCGCAATCTCATGTCCAATTATCCACCGACGGTGGCGGCGCAACCCACAACGACGGCGAATCCACTGCTGCAGCGAC  
ATCAATCTGAACAGCGACGAAGAGAATTACCGAAGATTGTCGAAACAGAGTCTACAAGTATGGACATTACGATCGGTCAA  
TCTAAGCAGCCTCAATTTTTGAAATCCATAGACGAATTAGCTGCGTTTTAGTTGCAAGTGAACATTCAAATGCCAATT  
CGATGATCTTCAGAAGCACATCGAGTCAATCGAAAACGCAATTGATCCAACTCGAGAGTAACGGCGTTGTCCTCGCCG  
CGCGGAACAATAATTTCCATCAGCCGATGTTATCGCTCCGCGGAACAATGTATCTGTAGAAACCACCGTCACTGTGAGC  
CAACCGTCTCAGGAGATTGTACCGGAGACGTCGAATAAACCGGAGGGGGGACGTATGTGTGAGTTGATGTGTAGCAAAGG  
TCTGCGTAAATACATATACGCGAATATCTCTGAACAAGCTAAGTTAATGGAAGAGATTCCCTCAGCTTTGAAATGGCCA  
AGGAGCCAGCGAAGTTTGTATTGGATTGTATTGGCAAGTTTACTTACAAGGGCGTAGAGCATTACTAAAGAGTCGCCT  
ATGAGCTCTGCGAGACAAGTTTCGCTTCTATACTGGAGTCTTTTCTTAATGCCTGATCGTGGTAAAGGGAAGGTGAA  
GATTGAGAGTTGGATTAAGATGAGGCGGAGACGGCTGCTGTTGCTTGGAGGAAAAGGTTGATGACTGAAGGAGGATTAG  
CTGCGGCTGAGAAAATGGATGCAAGGGGTTTGTCTTTACTAGTTGCTTGTGTTTGGTGTCTTCAAACCTTAGGAGTACA  
GATTTGCTGGATTTGATAAGGATGAGTGGTTCGAATGAGATTGCCGGTCTTTGAAAGCGGTCACAGTTTCTGTCCCTAT  
GGTCTCAGGTACCATATTTCTGTTCTCACTCGGTGAATTTCAATGCAAAGGTGGTTCCTTTTGTGACATCATCGACCAAC  
ATCAAGTTCCATCTTTGTTTTTCGATAAGCTTGATGGTATAAACTAGGAGAGCACATCAAATATTTAGAGTGAATGACT  
GATTGAGCCAAATCCTAGCTAGAAATTAATCTGGAAAAGACTTGGAACTCTCAACCATAGGTTTTGGTACGAAATGTTG  
CTTGTCAGAACCAATGATAGGCTATTGCCTGAAATAGTGTCTTGTGGTTTCAAATATTGGAAGTTAAAATCATATG  
ACTTAGCTGTTGGATACTAATTAAGCTTAAGCAATGCCAACTCTAAGAAGTGGTACTTACACAATATTCTATTGGTCATA  
GGTATAGTTGAATCAAGTATCAAGCGTGAATGCATATTGAAGCTCTTGAGATGGTTTATACCTTTGGCATGGAGGATAA  
GTTTTAGCTGCTCTAGTTCTAACTTCACTTAAAGATGAGCAAGGAGTCATTTGAGAGGGCAAACCGAAAGCCAGT  
CACCGCTGGCATTGATGAACCTTCCCTTGCACATTATGTACCTTTATGAACTTTTATCATCATCTGAGTCTGACCA  
TTGATATATTTATTTCTCAACAGAAAAGAGCGGCTACAAAGCAGCTAGCTGTGTTATCATCAGTTATGCAAGTATGGAG  
ACTACAAGTTAGATCCTGCGAAAAGAACTACCAGGATGGCAGATCAAAGAGCAAATGTTAGCTTGGAGAAAGACACTCT  
TCAGCTCGACAAAAGAGATGGAAGAGAAAAGCAAGATCTCTAGTTAATGGAGGAAGCCGCACTTCCAAGAGAATGTATA  
ACCAACAGATAAAAACGTCCAAGGTTGTCACCCATGGAATGCCACCAGTAACTTCTTATCGTATTCTCTATCTACCGT  
GATAGAAGCTTCTAGTCAAAGAGACGATGACCAAGATGAAATATCAGCTCTTGTGAGTAGTTACCTCGGCCCGTCAAC  
ATCTTTTCTCATCGCTCAAGAAGATCCCCGGAATATATGTTCCACTTCCACATGGTGGGTTAGGAAGAAGTGTATATG  
CATATGAACATCTGGCCCAAATTCATACTCTCCAGGTACCGGACATAGACTTCAATCGACAGTACTCTCCGTCTTTGGTT  
CACGGACAGAGACATCCACTACAGTACTCTCTCCAATTCATGGACAACAACAGTTACCATATGGTATACAAAGGTTTA  
CAGACATTCACCATCTGAAGAAAGATATTTGGGTTTATCCAATCAAAGGTCTCTCGCAGTAACCTATCATTAGACCCCA  
AATAGGAGGAATGTAATTTGTAACAAAGCTTTTTGTTTTGCTTAAAGTTAGTCATTTATTTAACTCCCAACAGTCTCAA  
AATTTAATTTAATGTTTGGGGCTTAAAGAATGCAATTTTTTGTCTCTGTAATTGACATTTAAGATGCTAATGTTATTGC  
TTCAGAGTTTTAGTCAACCTCAGATACATCGATATCTAAATAGACCTCTGGCTCTTGGTCATCTGGATTCTCT  
TCATCTTCTGTCTCTGTTCTTCTGTTCTCGTTGCACTGCTCGAGCAATTGCGGATTCACCTTGTGCTTACAGTTTC  
CCATGACACAAGCTTTTCCATGAATGTATTTATGTCCGCTTCTTATCTTTCTTGGGAAGATGAATTC

>FRI\_Lip-0

GGATCCCAAATCTAGTGCCGCGGAGTCTTTGGGACACAGTTTCGCACTTATCATTGATTGGCAAGCAGTAACTCGC

AAAATCCGACCACCGTGAAACATACTCCGGCGCTGAACGCTAGACGCAAATCCATATTACAGCTGCAGAAAGACGGAG  
AGAACAAGAGACTGACCGATCATAAGAGAAGAGAGCTTCAAGGCTTCAGCTGATGAAGAATCAATGGCGGCGAGAGAGAG  
TGAGAATCGAGTAGTTACTGAGAGGAAGATGAAACGTATCTCCTGAGAAAAACGTAAGAGAGTCCGTTTCAACAGTAT  
TTTTCTCGGCGGTCTTCAGATTTTCCGTCCAACCTCTCTCTTTCTCTTTTTCAGTTTTTTTTGCCCAATCACTCGTGGTAGG  
ATTTTTATAAGAAAGTTACGAAAATGCCCTCTCGTGCTTAGAGAGATTCAATTCGTGCACATATAATATGCCGTGAATA  
TACCACCAACTCTTACTCGTACTCGCATGTGGTGCCTGCAATATACACGTGATTGCAATCAACGGCTACGTTTTACTG  
ATAGGTGGCTCGTTAGTTTTGCACTGCCTTTGGGTGCGCGTGACCAAGTCATTTTCCAATGTGTTTTAATATTTGTGA  
ACTATTATAAATAAAAAAGCGAGCGACGTTGTTCTTTGATGAGGGAACGACCGTACGCTTGGCGACCTTCTCTGATTGCG  
TAGAGTCGTTTTCTTATTGGGCTTACCTAGTACCGCTGCCACAATGTTTTCATTTCTTTCCACCTAAAACTAAAAAG  
TACTACAAGTCACAACCTAAACCAAGTACACAAGGATTTTATCATGGGATTATCGTGTGTTGAAGACTAAAAAGAGCACA  
CCATCACCCCATTAGTGAGGTAGAGTAAGACAGTAACTTTGGGTTTCAATTACCGAGCAAGAACCGTTATTTGTGAT  
TAGACATGTTATAAACCACTGCTTTAGTGACTATTTAAAAAATATATTACATGTCGTAATCATGCAACCTAACTATGTT  
TTCATTAATCAAATACAAAGAATAAAGAGAAAAGTGCCTAGATTCAATTTTGGCATAGACTCAAAAGAGTGTATATAT  
ATCTGACTTTTTATTAATTTAAAAACAAATACATATTTTATAAGCAAACCTATAAAAGCCCTAAACATATAATGATT  
ACCTCAAAGGAAAAAGTCGTTTTCTCCTAATTAAGATAGGTTACTTCTAATTAATAGTATATAATTTATGTGAACCT  
CACAATATACAGTTCAATAAAATTTGGTAATTTGACCGATTAAGGAGAGTGAAATTAGGGCTTCTGCAATCTTTTTTC  
TTCGCCGCAATCTCATGTCCAATTATCCACCGACGGTGGCGGCGCAACCCACAACGACGGCAAATCCACTGCTGCAGCGA  
CATCAATCTGAACAGCGACGAAGAGAATTACCGAAGATTGTGAAACAGAGTCTACAAGTATGGACATTACGATCGGTCA  
ATCTAAGCCGCTCAATTTTTGAAATCCATAGACGAATTAGCTGCGTTTTTCAAGTTGCAAGTGGAAACATTCAAACGCCAAT  
TCGATGATCTTCAGAAGCACATCGAGTCAATCGAAAACGCAATTGATTCCAAACTCGAGAGTAACGGCGTTGCTCTCGCC  
GCGCGgAACATAATTTCCATCAGCCGATGTTATCGCCTCCGCGGAACAATGTATCTGTAGAAACCACCGTCACTGTGAG  
CCAACCGTCTCAGGAGATTGTACCGGAGACGTGCAATAAACCGGAGGGGGGACGTATGTGTGAGTTGATGTGTAGCAAAG  
GTCTGCGTAAATACATATACGCGAATATCTCTGAACAAGCTAAGTTAATGGAAGAGATTCTTCAGCTTTGAAATTGGCC  
AAGGAGCCAGCGAAGTTTGTATTGGATTGTATTGGCAAGTTTTACTTACAAGGGCGTAGAGCATTACTAAAGAGTCGCC  
TATGAGCTCTGCGAGACAAGTTTCGCTTCTATACTGGAGTCTTTCTTCTAATGCCTGATCGTGGTAAAGGGAAGGTGA  
AGATTGAGAGTTGGATTAAGATGAGGCGGAGACGGCTGCTGTTGCTTGGAGGAAAAGTTGATGACTGAAGGAGGATTA  
GCTGCGGCTGAGAAAATGGATGCAAGGGGTTTCTTTACTAGTTGCTTGTGTTTGGTGTTCCTTCAAACCTTAGGAGTAC  
AGATTGCTGGATTTGATAAGGATGAGTGGTTCGAATGAGATTGCCGGTCTTTGAAGCGGTCACAGTTTCTTGTCCCTA  
TGGTCTCAGGTACCATATTCTGTTCTACTCGGTGAATTTCAATGCAAAGGTGGTTCTTTTGTGACATCATCGACCAA  
CATCAAGTTCATCTTTGTTTTTCGATAAGCTTGATGGTATAAAGTAAAGGAGAGCAGTCAAAATTTAGAGTGCAATGAC  
TGATTGAGCCAAATCCTAGCTAGAAATTAATCTGGAAAGAACTTGGAACTCTCAACCATAGTTTTGGTACGAAATTTGT  
GCTTGTGAGAACCAATGATAGGCTATTGCCTTGAATAGTGTCTTGTGGTTTCCAATATTGGAAGTTAAATCATAT  
GACTTAGCTGTTGGATACTAATTAAGCTTAAGCAATGCCAAGTCTAAGAAGTGGTACTTACACAATATTTCTATTGGTCAT  
AGGTATAGTTGAATCAAGTATCAAGCGTGGAAATGCATATTGAAGCTCTTGAAGTGGTTTATACCTTTGGCATGGAGGATA  
AGTTTTAGCTGCTCTAGTTCTAATTTCAATTTAAAGATGAGCAAGGAGTCAATTTGAGAGGGCAAACGGAAAGCCAG  
TCACCGCTGGCATTGTATGAACCTTCCCTTGCACATTATGTACCTTTATGAACTCTTTATCATCATCTGAGTCTGACC  
ATTGATATATTTATTTCTCAACAGAAAAGCGGCTACAAAGCAGCTAGCTGTGTTATCATCAGTTATGCAGTGTATGGA  
GACTCACAAGTTAGATCTGCGAAAAGAACTACCAGGATGGCAGATCAAAGAGCAAATTTGTTAGCTTGGAGAAAAGACTC  
TTCAGCTCGACAAAGAGATGGAAGAGAAAGCAAGATCTCTCAGTTAATGGAGGAAGCTGCACTTGCCAAGAGAATGTAT  
AACCAACAGATAAAACGTCCAAGGTTGTCACCCATGGAAATGCCACCAGTAACTTCTTCATCGTATTCTCCTATCTACCG  
TGATAGAAGCTTTCCTAGTCAAAGAGACGATGACCAAGATGAAATATCAGCTCTTGTGAGTAGTTACCTCGGCCCGTCAA  
CATTTTTCTCATCGCTCAAGAAGATCCCGGAATATATGGTCCACTTCCACATGGTGGGTTAGGAAGAAGTGTATAT  
GCATATGAACATCTGGCCCCAATTCATACTCTCCAGGTCACGGACATAGACTTCATCGACAGTACTTCCGCTTTGGT  
TCACGGACAGAGACATCCACTACAGTACTCTCCTCAATTCATGGACAACAACAGTTACCATATGGTATACAAAAGGGTTT  
ACAGACATTCACCATCTGAAGAAAAGATATTTGGGTTTATCCAATCAAAGGTCTCCTCGCAGTAACTCATCATTAGACCC  
AAATAGGAGGAATGTAATTTGTAACAAAGCTTTTTGTTTTGCTTAAGTTAGTCATTTATTTAACTCCCAACAGTCTCA  
AAATTTAATTTAATGTTTGGGGCTTAAAGAATGCAAATTTTTTGTCTCTGTAATTGACATTTAAGATGCTAATGTTATTG  
CTTCAGAGTTTTAGTCAACCTCAGATACATCGATATCACTATCTAAATAGACCTCTGGCTCTTGGTTCATCTGGATTCTC  
TTCATCTTGTCTCTGTTCTTCTTCTGTTCTGCTGACTGCTCGAGCAATTGCGGATTCCAACCTTGTGCTTACAGTTT  
CCCATGACACAAGCTTTTCCATGAATGTATTTATGTCCGCTTCTTATCTTTCTTGGAGGAAGATGAAT

>FRI\_C24

GGATCCCAAATCTAGTGCCGCGAGTCCTTTGGGACACAGTTTCGCACTTATCATTGATTGGCAAGCAGTAACTCGC

AAAATCCGACCACCGTGAAACATACTCCGGCGCTGAACGCTAGACGCAAATCCATATTACTGCTGCAGAAAGACGGAG  
AGAACAAGAGACTGACCGATCATAAGAGAAGAGAGCTTCAAGGCTTCAGCTGATGAAGAATCAATGGCGGCGAGAGAGAG  
TGAGAATCGAGTAGTTACTGAGAGGAAGATGAAACGTATCTCCTGAGAAAAACGTAAGAGAGTCCGTTTCAACAGTAT  
TTTTCTCGGCGGTCTTCAGATTTTCCGTCCAACCTCTCTCTTTCTCTTTTCTTTTCCCAATCACTCGTGGTAGG  
ATTTTTATAAGAAAGTTACGAAAATGCCCTCTCGTGCTTAGAGAGATTCAATTCGTGCACATATAATATGCCGTGAATA  
TACCACCAACTCTTACTCGTACTCGCATGTGGTGCCTGCAATATACACGTGGTTTCAATCAACGGCTACGTTTTACTG  
ATAGGTGGCTCGTTTAGTTTTGCACTGCCTTTGGGTGCGCGTGACCAAGTCATTTTCCAATGTGTTTTAATATTTGTGA  
ACTATTATAAATAAAAAAGCGAGCGACGTTGTTCTGTTGATGAGGGAGCGACCGTACGTTGGCGACCTTCTCTGATTGCG  
TAGAGTCGTTTTCTTATTGGGCTTACCTAGTACCGTCAGCCACAATGTTTTCAATTTCTTTCCACCTAAAACTAAAAAG  
TACTACAAGTCACAACCTAAACCAAGTACACAAGGATTTTATCATGGGATTATCGTGTGTTGAAGACTAAAAAGAGCACA  
CCATCACCCCATTAGTGAGGTAGAGTAAGACAGTAACTTTGGGTTTCAATTACCGAGCAAGAACCGTTATTTGTGAT  
TAGACATGTTATAAACCACTGCTTTAGTGACTATTTAAAAAATATATTACATGTCGTAATCATGCAACCTAACTATGTT  
TTCATTAATCAAATACAAAGAATAAAGAGAAAAGTGCCTAGATTCAATTTTGGCATAGACTCAAAAGAGTGTATATAT  
ATCTGACTTTTTATTAATTTATAAACACAAATACATATTTTATAAGCAAACCTATAAAAGCCCTAAACATATAACGATT  
ACCTCAAAGGAAAAAGTCGTTTTCTCCTAATTAAGATAGGTTACTTCTAATTAATATATAATTTATGTGAACCTCAC  
AATATACAGTTCAATAAAATTTGGTAATTTGACCGATTTAAGGAGAGTGGAATTAGGGCTTCTGCAATCTTTTTCTTC  
GCCGCAATCTCATGTCCAATTATCCACCGACGGTGGCGGCGCAACCCACAACGACGGCGAATCCACTGCTGCAGCGACAT  
CAATCTGAACAGCGCGGAAGAGAATTACCGAAGATTGTCGAAACAGAGTCTACAAGTATGGACATTACGATCGGTCAATC  
TAAGCAGCCTCAATTTTTGAAATCCATAGACGAATTAGCTGCGTTTTTCAAGTTCAGTTCAGTGGAAACATTCAAACGCCAATTCG  
ATGATCTTCAGAAGCACATCGAGTCAATCGAAAACGCAATTGATTCCAACTCGAGAGTAACGGCGTtGTCCTCGCCGCG  
CGgAACAAATAATTTCCATCAGCCGATGTTATCGCCTCCGCGGAACAATGTATCTGTAGAAACCACCGTCACTGTGAGCCA  
ACCGTCTCAGGAGATTGTACCGGAGACGTCGAATAAACCGGAGGGGGAACGTATGTGTGAGTTGATGTGTAGCAAAGGTC  
TGCGTAAATACATATACGCGAATATCTCTGATCAAGCTAAGTTAATGGAAGAGATTCTTCAGCTTTGAAATTTGGCCAAG  
GAGCCAGCGAAGTTGTATTGGATTGTATTGGCAAGTTTTACTTACAAGGGCGTAGAGCATTACTAAAGAGTCGCCTAT  
GAGCTCTGCGAGACAAGTTTCGCTTCTTATACTGGAGTCTTTTCTTCAATGCCTGATCGTGGTAAAGGGAAGGTGAAGA  
TTGAGAGTTGGATTAAGATGAGGCGGAGACGGCTGCTGTTGCTTGGAGGAAAAGGTTGATGACTGAAGGAGGATTAGCT  
GCGGCTGAGAAAAATGGATGCAAGGGGTTTGTCTTTACTAGTTGCTTGTGTTTGGTGTCTTCAAACCTTAGGAGTACAGA  
TTTGCTGGATTTGATAAGGATGAGTGGTTCGAATGAGATTGCCGGTCTTTGAAGCGGTCACAGTTTCTTGTCCCTATGG  
TCTCAGGTACCATATTCTGTTCTCACTCGGTGAATTTCAATGCAAAGGTGGTTCCTTTTGTGACATCATCGACCAACAT  
CAAGTTCCATCTTTGTTTTCGATAAGCTTGATGGTATAAACTAGGAGAGCACATCAAATATTTAGAGTGAATGACTGA  
TTGAGCCAAATCCTAGCTAGAAATTAATCTGGAAGAAGCTTGAAGCTCAACCATAGGTTTTGGTACGAAATTTGTTGCT  
TGTCAGAACCAATGATAGGCTATTGCCTTGAATAGTGTCTTGTGTTTTCCAATATTGGAAGTTAAAATCATATGAC  
TTAGCTGTTGGATACTAATTAAGCTTAAGCAATGCCAAGCTAAGAAGTGGTACTTACACAATATTCTATTGGTCATAGG  
TATAGTTGAATCAAGTATCAAGCGTGAATGCATATTGAAGCTCTTGAATGGTTTATACCTTTGGCATGGAGGATAAGT  
TTTCAGCTGCTCTAGTTCTAACTTCACTTAAAGATGAGCAAGGAGTCATTTGAGAGGGCAAAACGGAAAGCCCAGTCA  
CCGCTGGCATTGATGAACCTTCCCTTGCACATTATGTACCTTATGAACTCTTTATCATCATCTGAGTCTGACCATT  
GATATATTTATTTCTCAACAGAAAGAAGCGGCTACAAAGCAGCTAGCTGTGTTATCATCAGTTATGCAGTGTATGGAGAC  
TCACAAGTTAGATCCTGCGAAAGAAGTACCAGGATGGCAGATCAAAGAGCAAATGTTAGCTTGAGAAAGACACTCTTC  
AGCTCGACAAAAGAGATGGAAGAGAAAGCAAGATCTCTCAGTTAATGGAGGAAGCCGCACTTGCCAAGAGAATGTATAAC  
CAACAGATAAAACGTCCAAGGTTGTACCCATGGAATGCCACCAGTAACTTCTTATCGTATTCTCTATCTACCGTGA  
TAGAAGCTTTCCTAGTCAAAGAGACGATGACCAAGATGAAATATCAGCTCTTGTGAGTAGTTACCTCGGCCCGTCAACAT  
CTTTTCTCATCGCTCAAGAAGATCCCGGAATATATGGTTCCACTTCCACATGGTGGGTTAGGAAGAAGTGTATATGCA  
TATGAACATCTGGCCCAAATTCATATTCTCCAGGTACGGACATAGACTTATCGACAGTACTCTCCGTCTTTGGTTCA  
CGGACAGAGACATCCACTACAGTACTCTCCTCAATTCATGGACAACAACAGTTACCATATGGTATACAAAGGGTTTACA  
GACATTCACCATCTGAAGAAAGATATTTGGGTTTATCCAATCAAAGGTCTCCTCGCAGTAACTCATATTAGACCCAAA  
TAGGAGGAATGTAATTTGTAACAAAGCTTTTTGTTTTGCTTAAAGTTAGTCAATTTAATTAACCTCCCAACAGTCTCAAAA  
TTTAATTTAATGTTTGGGGCTTAAAGAATGCAATTTTTTGTCTCTGTAATTGACATTTAAGATGCTAATGTTATTGCTT  
CAGAGGTTTTAGTCAACCTCAGATACATCGATACACTATCTAAATAGACCTTGGCTCTTGGTCTATCTGGATTCTCTTC  
ATCTTCTGTCTCTGTTCTTCTTCTGTTGCACTGCTCGAGCAATTGCGGATTCACCTTGTGCTTACAGTTTCCC  
ATGACACAAGCTTTTCCATGAATGATTTATGTCCGCCTTCTTATCTTTCTTGGGAAGA

>FRI\_Nok-3

GGATCCCAAATCTAGTGCCGCGAGTCCTTTGGGACAGAGTTTCGCACTTATCATTGATTTCGGCAAGCAGTAACTCGC



AAAATCCGACCACCGTGAACATACTCTGGCGCTGAACGCTAGACGCAAATCCATATTACTGCTGCAGAAAGACGGAG  
AGAACAAGAGACTGACCGATCATAAGAGAAGAGAGCTTCAAGGCTTCAGCTGATGAAGAATCAATGGCGGCGAGAGTGAG  
TGAGAATCGAGTAGTTACTGAGAGGAAGATGAAACGTATCTCCTGAGAAAAACGTAAGAGAGTCCGTTTCAACAGTAT  
TTTTCTCGGCGGTCTTCAGATTTTCCGTCCAACCTCTCTCTTCTCTTTCAGTTTTTTTTTGCCCAATCACTCGTGGTAG  
GATTTTTTTATAAGAAAAGTTACGAAAATGCCCTCTCGTGCTTAGAGAGATTCAATTCGTGCACATATAATATGCCGTGAA  
TATACCACCAACTCTTACTCGTACTCGCATGTGGTGCCTGCAATATACACGTGGTTCGAATCAACGGCTACGTTTTAC  
TGATAGGTGGCTCGTTTAGTTTTGCACTGCCCTTGGGTGCGCGTGACCAAGTCATTTTCCAATGTGTTTTAATATTTGT  
GAACTATTATAAAAAAGCGAGCGACGTTGTTGCTTGTGATGAGGGAGCGACCGTACGTTGGCGACCTTCTCTGATTG  
CGTAGAGTCGTTTTCTTATTGGGCTTACCTAGTACCGCCAGCCACAATGTTTTCAATTTCTTCCACCTAAAACTAAA  
AGTACTACAAGTCACAACCTAAACCAAGTACACAAGGATTTTATCATGGGATTATCGTGTGTTGAAGACTAAAAAGAGCA  
CACCATCACCCCATAGTGAGGTAGAGTAAGACAGTAACTTTTGGGTTTCAATTTACCGAGCAAGAACCGTTATTTGTG  
ATTAGACATGTTATAAACCACTGCTTTAGTGACTATTTAAAAAATATATTACATGTCGTAATCATGCAACCTAACTATG  
TTTTCATTAATCAAATACAAAGAATAAAGAGAAAAAGTGCCTAGATTCAATTACTGGCATAGACTCAAAGAGTGTATAT  
ATATCTGACTTTTTATTAATTTATAAACACAAATACATATTTTATAAGCAAACCTATAAAAGCCCTAAACATATAATGA  
TTACCTCAAAGGAAAAAGTCGTTTTCTCTAATTAAGATAGGTTACTTCTAATTAATATAATTTATGTGAACTTC  
ACAATATACAGTTCAATAAAATTTGGTAATTTGACCGATTTAAGGAGAGTGGAATTAGGGCTTCTGCAATCTTTTTCT  
TCGCCGCAATCTCATGTCCAATTATCCACCGACGGTGGCGGCGCAACCCACAACGACGGCGAATCCACTGCTGCAGCGAC  
ATCAATCTGAACAGCGACGAAGAGAATTACCGAAGATTGTCGAAACAGAGTCTACAAGTATGGACATTACGATCGGTCAA  
TCTAAGCAGcCTCAATTTTTGAAATCCATAGAGGAATTAGCTGCGTTTTAGTTGCAGTGGAAACATTCAAACGCCAATT  
CGATGATCTTCAGAAGCACATCGAGTCAATCGAAAACGCAATTGATCCAAACTCGAGAGTAACGGCGTTGTCCTCGCCG  
CGCGGAACAATAATTTCCATCAGCCGATGTTATCGCTCCGCGGAACAATGTATCTGTAGAAACCACCGTCACTGTGAGC  
CAACCGTCTCAGGAGATTGTACCGGAGACGTCGAATAAACCGGAGGGGGAACGTATGTGTGAGTTGATGTGTAGCAAAGG  
TCTGCGTAAATACATATACGCGAATATCTCTGATCAAGCTAAGTTAATGGAAGAGATTCCTTCAGCTTTGAAATTGGCCA  
AGGAGCCAGCGAAGTTTGTATTGGATTGATTGGCAAGTTTTACTTACAAGGGCGTAGAGCATTACTAAAGAGTCGCCT  
ATGAGCTCTGCGAGACAAGTTTCGCTTCTATACTGGAGTCTTTTCTTAATGCCTGATCGTGGTAAAGGGAAGGTGAA  
GATTGAGAGTTGGATTAAGATGAGGCGGAGACGGCTGCTGTTGCTTGGAGGAAAAGGTTGATGACTGAAGGAGGATTAG  
CTGCGGCTGAGAAAATGGATGCAAGGGGTTTGCTTTACTAGTTGCTTGTGTTTGGTGTCTTCAAACCTTAGGAGTACA  
GATTTGCTGGATTTGATAAGGATGAGTGGTTCGAATGAGATTGCCGGTCTTTGAAAGCGGTCACAGTTTCTGTCCCTAT  
GGTCTCAGGTACCATATTTCTGTTCTCACTCGGTGAATTTCAATGCAAAGGTGGTTCCTTTTGTGACATCATCGACCAAC  
ATCAAGTTCCATCTTTGTTTTTCGATAAGCTTGATGGTATAAACTAGGAGAGCACATCAAATATTTAGAGTGAATGACT  
GATTGAGCCAAATCCTAGCTAGAAATTAATCTGGAAGAAGCTTGAAGCTCTCAACCATAGGTTTTGGTACGAAATGTTG  
CTTGTCAGAACCAATGATAGGCTATTGCCTGAAATAGTGTCTTGTGGTTTCCAATATTGGAAGTTAAAATCATATG  
ACTTAGCTGTTGGATACTAATTAAGCTTAAGCAATGCCAAGCTAAGAAGTGGTACTTACACAATATTCTATTGGTCATA  
GGTATAGTTGAATCAAGTATCAAGCGTGAATGCATATTGAAGCTCTTGAATGGTTTATACCTTTGGCATGGAGGATAA  
GTTTTAGCTGCTCTAGTTCTAACTTCACTTAAAGATGAGCAAGGAGTCATTTGAGAGGGCAAACCGAAAGCCAGT  
CACCGCTGGCATTGTATGAACCTTCCCTTGCACATTATGTACCTTTATGAACTTTTATCATCATCTGAGTCTGACCA  
TTGATATATTTATTTCTCAACAGAAAGAAGCGGCTACAAAGCAGCTAGCTGTGTTATCATCAGTTATGCAAGTGTATGGAG  
ACTACAAGTTAGATCCTGCGAAAAGAACTACCAGGATGGCAGATCAAAGAGCAAATGTTAGCTTGGAGAAAGACACTCT  
TCAGCTCGACAAAGAGATGGAAGAGAAAGCAAGATCTCTAGTTAATGGAGGAAGCCGCACTTGCCAAGAGAATGTATA  
ACCAACAGATAAAACGTCCAAGGTTGTCACCCATGGAATGCCACCAGTAACTTCTTATCGTATTCTCTATCTACCGT  
GATAGAAGCTTTCCTAGTCAAAGAGACGATGACCAAGATGAAATATCAGCTCTTGTGAGTAGTTACCTCGGCCCGTCAAC  
ATCTTTTCTCATCGCTCAAGAAGATCCCCGGAATATATGTTCCACTTCCACATGGTGGGTTAGGAAGAAGTGTATATG  
CATATGAACATCTGGCCCAAATTCATACTCTCCAGGTACGGACATAGACTTCAATCGACAGTACTCTCCGTCTTTGGTT  
CACGGACAGAGACATCCACTACAGTACTCTCTCCAATTCATGGACAACAACAGTTACCATATGGTATACAAAGGTTTA  
CAGACATTACCATCTGAAGAAAGATATTTGGGTTTATCCAATCAAAGGTCTCTCGCAGTAACTCATATTAGACCCCA  
AATAGGAGGATGTAATTTGTAAACAAAGCTTTTTGTTTTGCTTAAGTTAGTCAATTTAATTACTCCAACAGTCTCAA  
AATTTAATTTAATGTTTGGGGCTTAAAGAATGCAATTTTTTGTCTCTGTAATTGACATTTAAGATGCTAATGTTATTGC  
TTCAGAGTTTTAGTCAACCTCAGATACATCGATATCAATAGACCTCTGGCTCTTGGTCTATCTGGATTCTCT  
TCATCTTCTGTCTCTGTTCTTCTGTTCTCGTTGCACTGCTCGAGCAATTGCGGATTCACCTTGTGCTTACAGTTTC  
CCATGACACAAGCTTTTCCATGAATGTATTTATGTCCGCTTCTTATCTTTCTTGGGAAGATGAATTC

>FRI\_Edi-0

GGATCCCAAATCTAGTGCCGCGGAGTCTTTGGGACAGAGTTTCGCACTTATCATTGATTGGCAAGCAGTAACTCGC

AAAATCCGACCACCGTGAACATACTCTGGCGCTGAACGCTAGACGCAAATCCATATTACTGCTGCAGAAAGACGGAG  
AGAACAAGAGACTGACCGATCATAAGAGAAGAGAGCTTCAAGGCTTCAGCTGATGAAGAATCAATGGCGGCGAGAGTGAG  
TGAGAATCGAGTAGTTACTGAGAGGAAGATGAAACGTATCTCCTGAGAAAAACGTAAGAGAGTCCGTTTCAACAGTAT  
TTTTCTCGGCGGTCTTCAGATTTCCGTCCAACCTCTCTCTTCTCTTTCAGTTTTTTTTGCCCAATCACTCGTGGTAG  
GATTTTTTTATAAGAAAGTTACGAAAATGCCCTCTCGTGCTTAGAGAGATTCAATTCGTGCACATATAATATGCCGTGAA  
TATACCACCAACTCTTACTCGTACTCGCATGTGGTGGTGCATATACACGTGGTTCGAATCAACGGCTACGTTTTAC  
TGATAGGTGGCTCGTTTGTAGTTTGCCTGCTTTGGGTGCGCGTGACCAAGTCATTTTCCAATGTGTTTTAATATTTGT  
GAACTATTATAAAAAAGCGAGCGACGTTGTTGTTGATGAGGGAGCGACCGTACGTTGGCGACCTTCTCTGATTG  
CGTAGAGTCGTTTTCTTATTGGGCTTACCTAGTACCGTCAGCCACAATGTTTTCATTTCTTCCACCTAAAACTAAA  
AGTACTACAAGTCACAACCTAAACCAAGTACACAAGGATTTTATCATGGGATTATCGTGTGTTGAAGACTAAAAAGAGCA  
CACCATACCCCCATTAGTGCAGGTAGAGTAAGACAGTAACTTTTGGGTTTCAATTACCGAGCAAGAACCGTTATTTGTG  
ATTAGACATGTTATAAACCACTGCTTTAGTGACTATTTAAAAACAATATATTACATGTCGTAATCATGCAACCTAACTATG  
TTTTCATTAATCAAATACAAAGAATAAAGAGAAAAAGTGCCTAGATTCAATTATTTGGCATAGACTCAAAGAGTGTATAT  
ATATCTGACTTTTTATTAATTTATAAACACAAATACATATTTTATAAGCAAACCTATAAAAGCCCTAACATATAACGA  
TTACCTCAAAGGAAAAAGTCGTTTTCTCTAATTAAGATAGGTTACTTCTAATTAATATAATTTATGTGAACTTC  
ACAATATACAGTTCAATAAAATTTGGTAATTTGACCGATTTAAGGAGAGTGGAATTAGGGCTTCTGCAATCTTTTTCT  
TCGCCGCAATCTCATGTCCAATTATCCACCGACGGTGGCGGCGCAACCCACAACGACGGCGAATCCACTGCTGCAGCGAC  
ATCAATCTGAACAGCGACGAAGAGAATTACCGAAGATTGTCGAAACAGAGTCTACAAGTATGGACATTACGATCGGTCAA  
TCTAAGCAGCCTCAATTTTTGAAATCCATAGACGAATTAGCTGCGTTTTAGTTGCAAGTGAACATTCAAACGCCAATT  
CGATGATCTTCAGAAGCACATCGAGTCAATCGAAAACGCAATTGATCCAACTCGAGAGTAACGGCGTTGCTCCTCGCCG  
CGCGGAACAATAATTTCCATCAGCCGATGTTATCGCTCCGCGGACAATGTATCTGTAGAAACCACCGTCACTGTGAGC  
CAACCGTCTCAGGAGATTGTACCGGAGACGTCGAATAAACCGGAGGGGGAACGTATATGTGAGTTGATGTGTAGCAAAGG  
TCTGCGTAAATACATATACGCGAATATCTCTGATCAAGCTAAGTTAATGGAAGAGATTCCTTCAGCTTTGAAATGGCCA  
AGGAGCCAGCGAAGTTTGTATTGGATTGATTGGCAAGTTTACTTACAAGGGCGTAGAGCATTACTAAAGAGTCGCT  
ATGAGCTCTGCGAGACAAGTTTCTTATACTGGAGTCTTTTCTTAATGCCTGATCGTGGTAAAGGGAAGGTGAA  
GATTGAGAGTTGGATTAAGATGAGGCGGAGACGGCTGCTGTTGCTTGGAGGAAAAGGTTGATGACTGAAGGAGGATTAG  
CTGCGGCTGAGAAAATGGATGCAAGGGGTTTGTCTTTACTAGTTGCTTGTGTTTGGTGTCTTCAAACCTTAGGAGTACA  
GATTTGCTGGATTTGATAAGGATGAGTGGTTCGAATGAGATTGCCGGTCTTTGAAAGCGGTCACAGTTTCTGTCCCTAT  
GGTCTCAGGTACCATATTTCTGTTCTCACTCGGTGAATTCATTGCAAAGGTGGTTCCTTTTGTGACATCATCGACCAAC  
ATCAAGTTCCATCTTTGTTTTTCGATAAGCTTGATGGTATAAACTAGGAGAGCACATCAAATATTTAGAGTGAATGACT  
GATTGAGCCAAATCCTAGCTAGAAATTAATCTGGAAGAAGTGGAACTCTCAACCATAGGTTTTGGTACGAAATGTTG  
CTTGTCAGAACCAATGATAGGCTATTGCCTGAAATAGTGTCTTGTGGTTTCCAATATTGGAAGTTAAAATCATATG  
ACTTAGCTGTTGGATACTAATTAAGCTTAAGCAATGCCAACTCTAAGAAGTGGTACTTACACAATATTCTATTGGTCATA  
GGTATAGTTGAATCAAGTATCAAGCGTGAATGCATATTGAAGCTCTTGAATGGTTTATACCTTTGGCATGGAGGATAA  
GTTTTAGCTGCTCTAGTTCTAACTTCACTTAAAGATGAGCAAGGAGTCATTTGAGAGGGCAAACCGAAAGCCAGT  
CACCGCTGGCATTGTATGAACCTTCCCTTGCACATTATGTACCTTTATGAACTTTTATCATCATCTGAGTCTGACCA  
TTGATATATTTATTTCTCAACAGAAAGAAGCGGCTACAAAGCAGCTAGCTGTGTTATCATCAGTTATGCAGTGTATGGAG  
ACTACAAGTTAGATCCTGCGAAAAGAACTACCAGGATGGCAGATCAAAGAGCAAATGTTAGCTTGGAGAAAGACACTCT  
TCAGCTCGACAAAGAGATGGAAGAGAAAGCAAGATCTCTAGTTAATGGAGGAAGCCGCACTTCCAAGAGAATGTATA  
ACCAACAGATAAAACGTCCAAGGTTATCACCCATGGAATGCCACCAGTAACTTCTTCATCGTATTCTCCTATCTACCGT  
GATAGAAGCTTTCCTAGTCAAAGAGACGATGACCAAGATGAAATATCAGCTCTTGTGAGTAGTTACCTCGGCCCGTCAAC  
ATCTTTCTCATCGCTCAAGAAGATCCCCGGAATATATGTTCCACTTCCACATGGTGGGTTAGGAAGAAGTGTATATG  
CATATGAACATCTGGCCCCAAATTCATATTCTCCAGGTACCGGACATAGACTTTCATCGACAGTACTCTCCGTCTTTGGTT  
CACGGACAGAGACATCCACTACAGTACTCTCCTCAATTCATGGACAACAACAGTTACCATATGGTATACAAAGGTTTA  
CAGACATTACCATCTGAAGAAAGATATTTGGGTTTATCCAATCAAAGGTCTCCTCGCAGTAACTCATATTAGACCCCA  
AATAGGAGGATGTAATTTGTAAACAAAGCTTTTTGTTTTGCTTAAGTTAGTCAATTTAATTACTCCAACAGTCTCAA  
AATTTAATTTAATGTTTGGGGCTTAAGAATGCAATTTTTTGTCTCTGTAATTGACATTTAAGATGCTAATGTTATTGC  
TTCAGAGTTTTAGTCAACCTCAGATACATCGATATCAATAGACCTCTGGCTCTTGGTCTATCTGGATTCTCT  
TCATCTTCTGTCTCTGTTCTTCTGTTCTCGTTGCACTGCTCGAGCAATTGCGGATCCAACCTTGTGCTTACAGTTTC  
CCATGACACAAGCTTTTCCATGAATGTATTTATGTCCGCTTCTTATCTTTCTTGGGAAGATGAATTC

>FRI\_St-0

GGATCCCAAATCTAGTGCCGCGAGTCCTTTGGGACACAGTTTCGCACTTATCATTGATTGGCAAGCAGTAACTCGC

AAAATCCGACCACCGTGAAACATACTCCGGCGCTGAACGCTAGACGCAAAATCCATATTACAGCTGCAGAAAGACGGAG  
AGAACAAGAGACTGACCGATCATAAGAGAAGAGAGCTTCAAGGCTTCAGCTGATGAAGAATCAATGGCGGCGAGAGAGAG  
TGAGAATCGAGTAGTTACTGAGAGGAAGATGAAACGTATCTCCTGAGAAAAACGTAAGAGAGTCCGTTTCAACAGTAT  
TTTTCTCGGCGGTCTTCAGATTTTCCGTCCTCTCTCTTTCTCTTTTCTTTTCCCAATCACTCGTGGTAGG  
ATTTTTATAAGAAAGTTACGAAAATGCCCTCTCGTGCTTAGAGAGATTCAATTCGTGCACATATAATATGCCGTGAATA  
TACCACCACTCTCTTACTCGTACTCGCATGTGGTGCGTGCAATATACACGTGATTGAATCAACGGCTACGTTTTACTG  
ATAGGTGGCTCGTTTGTAGTTTGCCTGCTTTGGGTGCGCGTGACCAAGTCATTTTCCAAATGTGTTTTAATATTTGTGA  
ACTATTATAAAAAAGCGAGCGACGTTGTTCTTTGATGAGGGAACGACCGTACGCTTGGCGACCTTCTCTGATTGCG  
TAGAGTCGTTTTCTTATTGGGCTTACCTAGTACCGCCAGCCACAATGTTTTCAATTTCTTTCCACCTAAAATAAAAG  
TACTACAAGTCACAACCTAAACCAAGTACAGGTAGAGTAAGACAGTAACTTTGGGTTTCAATTACCGAGCAAGAACCG  
TTATTTGTGATTAGACATGTTATAAACCACTGCTTTAGTGACTATTTAAAAAATATATTACATGTCGTAATCATGCAAC  
CTAATATGTTTTCATTAATCAAATACAAAGAATAAAGAGAAAAAGTGCCTAGATTCAATTTTGGCATAGACTCAAAAG  
AGTGTATATATATCTGACTTTTTATTAATTTAAAAACAAATACATATTTTCATAAGCAAACTATAAAAGCCCTAAAC  
ATATAACGATTACCTCAAAGGAAAAAGTCGTTTTCTCCTAATTTAAAGATAGGTTACTTCTAATTAATATATAATTTAT  
GTGAACCTCACAATATACAGTTCAATAAAATTTGGTAATTTGACCGATTTAAGGAGAGTGGAATTAGGGCTTCTGCAAT  
CTTTTTCTTCGCCCAATCTCATGTCCAATTATCCACCGACGGTGGCGGCGCAACCCACAACGACGGCGAATCCACTGC  
TGCAGCGACATCAATCTGAACAGCGACGAAGAGAATTACGAAGATTGTGCAACAGAGTCTACAAGTATGGACATTACG  
ATCGGTCAATCTAAGCAGcCTCAATTTTTGAAATCCATAGACGAATTAGCTGCGTTTTCAGTTGCAGTGGAACATTCAA  
ACGCCAATTCGATGATCTTCAGAAGCACATCGAGTCAATCGAAAACGCAATTGATTCCAACTCGAGAGTAACGGCGTTG  
TCCTCGCCGCGCGGAACAATAATTTCTATCAGCCGATGTTATCGCCTCCGCGGAACAATGTATCTGTAGAAACACCGTC  
ACTGTGAGCCAACCGTCTCAGGAGATTGTACCGGAGACGTGCAATAAACCGGAGGGGGAACGTATGTGTGAGTTGATGTG  
TAGCAAAGGTCTGCGTAAATACATATACGCGAATATCTCTGATCAAGCTAAGTTAATGGAAGAGATTCTTCAGCTTTGA  
AATTGGCCAAGGAGCCAGCGAAGTTTGTATTGGATTGTATTGGCAAGTTTTACTTACAAGGGCGTAGAGCATTACTAAA  
GAGTCGCCTATGAGCTCTGCGAGACAAGTTTCGCTTCTTATACTGGAGTCTTTTTCTTCTAATGCCTGATCGTGGTAAAGG  
GAAGGTGAAGATTGAGAGTTGGATTAAGATGAGGCGGAGACGGCTGCTGTTGCTTGGAGGAAAAGGTTGATGACTGAAG  
GAGGATTAGCTGCGGCTGAGAAAATGGATGCAAGGGGTTTGTCTTTACTAGTTGCTTGTGTTTGGTGTTCCTTCAAACCTT  
AGGAGTACAGATTTGCTGGATTTGATAAGGATGAGTGGTTCGAATGAGATTGCCGGTCTTTGAAGCGGTACAGTTTCT  
TGTCCTATGGTCTCAGGTACCATATTTCTGtCTCACTCGTGAAATTTATTGCAAAGGTGGTTCCTTTGTTGACATCA  
TCGACCAACATCAAGTTCCATCTTTGTTTTCGATAAGCTTGATGGTATAAACTAGGAGAGCACATCAAATATTTAGAGT  
GCAATGACTGATTGAGCCAAATCCTAGCTAGAAATTAATCTGGAAGAAGTGGAACTCTCAACCATAGGTTTTGGTACG  
AAATTGTTGCTTGCAGAACCAATGATAGGCTATTGCCTTGAATAGTGTCTTGTGGTTTTCAATATTGGAAGTTAA  
AATCATATGACTTAGCTGTTGGATACTAATTAAGCTTAAGCAATGCCAACTCTAAGAAGTGGTACTTACACAATATTCTA  
TTGGTCATAGGTATAGTTGAATCAAGTATCAAGCGTGAATGCATATTGAAGCTCTTGAATGGTTTATACCTTTGGCAT  
GGAGGATAAGTTTTAGCTGCTCTAGTTCTAACTTCAATCTTAAAGATGAGCAAGGAGTCAATTTGAGAGGGCAAAACGGA  
AAGCCCAGTCACCGCTGGCATTGTATGAACCTTCCCTTGACATTATGTACCTTTATGAACCTTTATCATCATCTGA  
GTCTGACCATTGATATATTTATTTCTCAACAGAAAGAAGCGGCTACAAAGCAGCTAGCTGTGTTATCATCAGTTATGCAG  
TGTATGGAGACTCACAAGTTAGATCCTGCGAAAGAAGTACCAGGATGGCAGATCAAAGAGCAAATGTTAGCTTGGAGAA  
AGACTCTTACGCTCGACAAAAGAGATGGAAGAGAAAGCAAGATCTCTCAGTTTAAATGGAGGAAGCCGCACTTGCCAAGA  
GAATGTATAACCAACAGATAAAACGTCCAAGGTTGTCACCCATGGAATGCCACCAGTAACTTCTTATCATGATTCTCCT  
ATCTACCGTGATAGAAGCTTCTAGTCAAAGAGACGATGACCAAGATGAAATATCAGCTCTTGTGAGTAGTTACCTCGG  
CCCGTCAACATCTTTCTCATCGCTCAAGAAGATCCCCGGAATATATGGTTCCACTTCCACATGGTGGGTTAGGAAGAA  
GTGTATATGCATATGAACATCTGGCCCCAAATTCATATTTCCAGGTCACGGACATAGACTTATCGACAGTACTCTCCG  
TCTTTGGTTCACGGACAGAGACATCCACTACAGTACTCTCCTCAATTCATGGACAACAACAGTTACCATATGGTATACA  
AAGGGTTTACAGACATTCACCATCTGAAGAAAGATATTTGGGTTTATCCAATCAAAGGTCTCCTCGCAGTAACTCATCAT  
TAGACCCCAAATAGGAGGaaATGTAATTTGTAACAAAGCTTTTTGTTTTGCTTAAAGTTAGTCAATTTAACTCCCAA  
CAGTCTCAAAATTTAATTAATGTTTGGGGCTTAAAGATGCAAAATTTTTGCTCCTGTAATTGACATTTAAGATGCTAA  
TGTTATTGCTTCAGAGTTTTAGTCAACCTCAGATACATCGATATCACTATCTAAATAGACCTCTGGCTCTTGGTCTATCT  
GGATTCTTCTCATCTTCTGTCTCTGTTCTTCTGTTCTCGTTGCACTGCTCGAGCAATTGCGGATTCCAACCTTGTGCT  
TACAGTTTCCATGACACAAGCTTTTCCATGAATGTATTTATGTCCGCTTCTTATCTTTCTTGGAGGAAGATGAATTC

>FRI\_Pu-2-23

GGATCCCAAATCTAGTGCCCGGAGTCCTTTGGGACAGAGTTTCGCACTTATCATTGATTCCGCAAGCAGTAACTCGC  
AAAATCCGACCACCGTGAAACATACTCTGGCGCTGAACGCTAGACGCAAAATCCATATTACTGCTGCAGAAAGACGGAG

AGAACAAGAGACTGACCGATCATAAGAGAAGAGAGCTTCAAGGCTTCAGCTGATGAAGAATCAATGGCGGCGAGAGAGAG  
TGAGAATCGAGTAGTTACTGAGAGGAAGATGAAACGTATCTCCTGAGAAAAACGTAAGAGAGTCCGTTTCAACAGTAT  
TTTTCTCGGCGGTCTTCAGATTTCCGTCCAACCTCTCTCTTCTCTTTCAGTTTTTTTTTGCCCAATCACTCGTGGTAG  
GATTTTTTTATAAGAAAAGTTACGAAAATGCCCTCTCGTGCTTAGAGAGATTCAATTCGTGCACATATAATATGCCGTGAA  
TATACCACCAACTCTTACTCGTACTCGCATGTGGTGGTGCATATACACGTGGTTCGAATCAACGGCTACGTTTTAC  
TGATAGGTGGCTCGTTTAGTTTTGCACTGCCCTTGGGTGCGCGTGACCAAGTCATTTTCCAATGTGTTTTAATATTTGT  
GAACTATTATTAATAAAAAAGCGAGCGACGTTGTTGTTGATGAGGGAGCGACCGTACGCTTGGCGACCTTCTCTGATTG  
CGTAGAGTCGTTTTCTTATTGGGCTTACCTAGTACCGTCAGCCACAATGTTTTCATTTCTTCCACCTAAAACTAAA  
AGTACTCACAAGTCACAACCTAAACCAAGTACACAAGGATTTTATCATGGGATTATCGTGTTGAAGACTAAAAAGAGCA  
CACCATACCCCCATTAGTGCAGGTAGAGTAAGACAGTAACTTTTGGGTTTCATATTACCGAGCAAGAACCGTTATTTGTG  
ATTAGACATGTTATAAACCACTGCTTTAGTACTATTTAAAAACAATATATTACATGTCGTAATCATGCAACCTAACTATG  
TTTTATTAGTCAAATACAAAGAATAAAGAGAAAAAGTGCAGTATTCAATTTTGGCATAGACTCAAAGAGTGTATAT  
ATATCTGACTTTTTATTAATTTAAACACAAATACATATTTTATAAGCAAACTATAAAAGCCCTAAACATATAATGA  
TTACCTCAAAGGAAAAAGTCGTTTTCTCTAATTAAGATAGTTACTTCTAATTAATAGTATATAATTTATGTGAAC  
TTCACAATATACAGTTCAATAAAATTTGGTAATTTGACCGATTTAAGGAGAGTGGAAATTAGGGCTTCTGCAATCTTTTT  
TCTTCGCGCAATCTCATGTCCAATTATCCACCGACGGTGGCGGCGCAACCCACAACGACGGCAAATCCACTGCTGCAGC  
GACATCAATCTGAACAGCGACGAAGAGAATTACCGAAGATTGTCGAAACAGAGTCTACAAGTATGGACATTACGATCGGT  
CAATCTAAGCAGCCTCAATTTTTGAAATCCATAGACGAATTAGCTGCGTTTTAGTTGCAGTGGAAACATTCAAACGCCA  
ATTCGATGATCTTCAGAAGCACATCGAGTCAATCGAAAACGCAATTGATTCCAACTCGAGAGTAACGGCGTTGCTCTCG  
CCGCGCGGAACAATAATTTCCATCAGCCGATGTTATCGCCTCCGAGAACAATGTATCTGTAGAAACCACCGTCACTGTG  
AGCCAACCGTCTCAGGAGATTGTACCGGAGACGTGCAATAAACCGGAGGGGGCACGTATGTGTGAGTTGATGTGTAGCAA  
AGGTCTGCGTAAATACATATACGCGAATATCTCTGATCAAGCTAAGTTAATGGAAGAGATTCTTCAGCTTTGAAATTGG  
CCAAGGAGCCAGCGAAGTTTGTATTGGATTGTATTGGCAAGTTTTACTTACAAGGGCGTAGAGCATTACTAAAGAGTCG  
CCTATGAGCTCTGCGAGACAAGTTTCGCTTCTTATACTGGAGTCTTTTTCTTCTAATGCCTGATCGTGGTAAAGGGAAGT  
GAAGATTGAGAGTTGGATTAAGATGAGGCGGAGACGGCTGCTGTTGCTGGAGGAAAAGTTGATGACTGAAGGAGGAT  
TAGCTGCGGCTGAGAAAATGGATGCAAGGGGTTGCTTTACTAGTTGCTTGTGTTTGGTGTTCCTTCAAACCTTAGGAGT  
ACAGATTTGCTGGATTTGATAAGGATGAGTGGTTCGAATGAGATTGCCGGTGTGTTGAAGCGGTACAGTTTCTTGTCCC  
TATGGTCTCAGGTACCATATTCTGTTCTCACTCGGTGAATTTCAATGCAAAGGTGGTTCCTTTGTTGACATCATCGACC  
AACATCAAGTTCATCTTTGTTTTCGATAAGCTTGATGGTATAAACTAGGAGAGCACATCAAATATTTAGAGTGAATG  
ACTGATTGAGCCAAATCCTAGCTAGAAATTAATCTGGAAAGAACTTGGAACTCTCAACCATAGGTTTTGGTACGAAATTG  
TTGCTTGTGAGAACCAATGATAGGCTATTGCCTTGAAATAGTGTTCCTTGTGGTTTTCCAATATTGGAAGTTAAATCAT  
ATGACTTAGCTGTTGGATACTAATTAAGCTTAAGCAATGCCAACTCTAAGAAGTGGTACTTACACAATATTCTATTGGTC  
ATAGGTATAGTTGAATCAAGTATCAAGCGTGGAAATGCATATTGAAGCTCTTGAGATGGTTTATACCTTTGGCATGGAGGA  
TAAGTTTTAGCTGCTCTAGTTCTAACTTCAATCTTAAAGATGAGCAAGGAATCATTTGAGAGGGCAAACGGAAAAGCCC  
AGTCACCGCTGGCATTGTATGAACCTTCCCTTGCACATTATGTACCTTTATGAACTCTTTATCATCATCTGAGTCTGA  
CCATTGATATATTTATTTCTCAACAGAAAAGCGGCTACAAAGCAGCTAGCTGTGTTATCATCAGTTATGCAGTGTATG  
GAGACTCACAAGTTAGATCCTGCGAAAAGAACTACCAGGATGGCAGATCAAAGAGCAAATTGTTAGCTTGGAGAAAAGACAC  
TCTTCAGCTCGACAAAGAGATGGAAGAGAAAAGCAAGATCTCTCAGTTAATGGAGGAAGCCGCACTTGCCAAGAGAATGT  
ATAACCAACAGATAAAACGTCCAAGGTTGTCACCCATGGAAATGCCACAGTAGCTTCTTCATCGTATTTCTCTATCTAC  
CGTGATAGAAGCTTCTAGTCAAAGAGACGATGACCAAGATGAAATATCAGCTCTTGTGAGTAGTTACCTCGGCCCGTC  
AACATCTTTCTCATCGCTCAAGAAGATCCCGGAATATATGGTCCACTTCCACATGGTGGGTTAGGAAGAAGTGTAT  
ATGCATATGAACATCTGGCCCCAAATTCATACTCTCCAGGTCACGGACATAGACTTCATCGACAGTACTCTCCGTCTTTG  
GTTACGGACAGAGACATCCACTACAGTACTCTCTCCAATTCATGGACAACAACAGTTACCATATTGTATACAAAGGGT  
TTACAGACATTCACCATCTGAAGAAAAGATATTTGGGTTTATCCAATCAAAGGTCTCTCGCAGTAACTCATCATTAGACC  
CCAAATAGGAGGAATGTAAATTTGTAACAAAGCTTTTTGTTTTGCTTAAAGTTAGTCATTTATTAACCTCCAACAGTCT  
CAAATTTAATTTAATGTTTGGGGCTTAAAGATGCAAATTTTTTGTCTCTGTAATTGACATTTAAGATGCTAATGTTAT  
TGCTTCAGAGGTTTTAGTCAACCTCAGATACATCGATATCACTATCTAAATAGACCTCTGGCTCTTGGTCATCTGGATTC  
TCTTCATCTTCTGTCTCTGTTCTTCTTCTGTTCTCGTTGCACTGCTCGAGCAATTGCGGATTCACCTTGTGCTTACAGT  
TTCCCATGACACAAGCTTTCCATGAATGATTTATGTCCGCTTCTTATCTTTCTGAGGAAGATGAATTC

>FRI\_Sha

GGATCCCAAAATCTAGTGCCGCCGAGTCCTTTGGGACAGAGTTTCGCACTTATCATTGATTTCGGCAAGCAGTAACTCGCAAAA  
TCCGCACCACCGTGAAACATACTCTGGCGCTGAACGCTAGACGCAAAATCCATATTACTGCTGCAGAAAGACGGAGAGAACA  
GAGACTGACCGATCATAAGAGAAGAGAGCTTCAAGGCTTCAGCTGATGAAGAATCAATGGCGGCGAGAGTGAGTGAGAATC  
GAGTAGTACTGAGAGGAAGATGAAACGTATCTCTGAGAAAAAACGTAAGAGAGTTCGGTTTCAACAGTATTTTTCTCGGCG  
GTCTTCAGATTTCCGTCCTCTCTCTTCTCTTTCAGTTTTTTTTGCCCAATCACTCGTGGTAGGATTTTTTATAAGAAAG  
TTACGAAAATGCCCTCTCGTGCTTAGAGAGATTCAATTCGTGCACATATAATATGCCGTGAATATACCACCAACTCTTACTCG  
TACTCGCATGTGGTGCGTGCATATACACGTGGTTCGAATCAACGGCTACGTTTTACTGATAGGTGGCTCGTTAGTTTTGCAC  
TGCCTTTGGGTGCGCGTGACCAAGTCATTTTCAAATGTGTTTTAATATTTGTGAACTATTATTAATAAAAAAGCGAGCGACGTT  
GTTCTTTGATGAGGGAACGACCGTACGCTTGGCGACCTTCTCTGATTGCGTAGAGTCGTTTTCTTATTGGGCTTACCTAGTACC  
GTCAGCCCAATGTTTTCAATTTCTTCCACCTAAAATAAAAGTACTACAAGTCACAACCTAAACCAAGTACACAAGGATTT  
TATCATGGGATTATCGTGTTTGAAGACTAAAAAGAGCACACCATCACCCCATAGTGCAGGTAGAGTAAGACAGTAACTTTT  
GGGTTTCAATTACCGAGCAAGAACCGTTATTTGTGATTAGACATGTTATAAACCACTGCTTTAGTGACTATTTAAAAACAATAT  
TACATGTCGTAATCATGCAACCTAACTATGTTTTTCAATCAAAATCAAAAGAATAAAGAGAAAAGTGCAGTATTCAATTTT  
GGCATAGACTCAAAAAGAGTGTATATATCTGACTTTTTAAATTTAAACACAAATACATTTTTTATAAGCAAAAATAA  
AAGCCCTAAAGATATAACGATTACCTCAAAGGAAAAAGTGTCTTCTCTAATTAAGATAGGTTACTTCTAATTAATATATA  
ATTTATGTGAACCTCACAATATACAGTTCAATAAAATTTGGTAATTTGACCGATTTAAGGAGAGTGGAATTTGGGCTTCTGCA  
ATCTTTTTCTTCGCCGAATCTCATGTCCAATTATCCACCGACGGTGGCGGCGCAACCCACAACGACGGCGAATCCACTGCTG  
CAGCGACATCAATCTGAACAGCGACGAAGAGAATTACCGAAGATTGTGAAACAGAGTCTACAAGTATGGACATTACGATCG  
GTCAATCTAAGCAGCCTCAAATTTGAAATCCATAGACGAATTAGCTGCGTTTTAGTTGCAGTGGAAACATTCAAACGCCAAT  
TCGATGATCTTCAGAAGCACATCGAGTCAATCGAAAACGCAATTGATTCAAACCTCGAGAGTAACGGCGTTGCTCTCGCCGCG  
CGGAACAATAATTTCCATCAGCCGATGTTATCGCTCCGCGGAACAATGTATCTGTAGAAACCACCGTCACTGTGAGCCAACCG  
TCTCAGGAGATTGTACCGGAGACGTGCAATAAACCGGAGGGGGGACGTATGTGTGAGTTGATGTGTAGCAAAGGTCTGCGT  
AAATACATATACGCGAATATCTCTGATCAAGCTAAGTTAATGGAAGAGATTCCTTCAGCTTTGAAATTGGCCAAGGAGCC  
AGCGAAGTTTGATTGGATTGTATTGGCAAGTTTTACTTACAAGGGCGTAGAGCATTACTAAAGAGTGCCTATGAGCT  
CTCGGAGACAAGTTTCGCTTCTTATACTGGAGTCTTTTCTTCTAATGCCTGATCGTGGTAAAGGGAAGGTGAAGATTGAG  
AGTTGGATTAAGATGAGGCGGAGACGGCTGCTGTTGCTTGGAGGAAAAGGTTGATGACTGAAGGAGGATTAGCTGCGGC  
TGAGAAAATGGATGCAAGGGGTTGCTTTACTAGTTGCTTGTGTTGGTTCCTTCAAACCTTAGGAGTACAGATTTGC  
TGGATTTGATAAGGATGAGTGGTTCGAATGAGATTGCCGGTCTTTGAAGCGGTCACAGTTTCTGTCCCTATGGTCTCA  
GGTACCATATTCTGTTCTCACTCGGTGAATTTTATTGCAAAGGTGGTTCCTTTTGTGACATCATCGACCAACATCAAGT  
TCCATCTTTGTTTTCGATAAGCTTGATGGTATAAACTAGGAGAGCACATCAAATATTTAGAGTGCATGACTGATTGAG  
CCAAATCCTAGCTAGAAATTAATCTGGAAAGAAGTGGAACTCTCAACCATAGGTTTTGGTACGAAATGTTGCTTGTCA  
GAACCAATGATAGGCTATTGCCTTGAATAGTGTCTTGTGGTTTTCAAATATTGGAAGTTAAATCATATGACTTAGC  
TGTTGGATACTAATTAAGCTTAAGCAATGCCAAGTCTAAGAAGTGGTACTTACACAATATTCTATTGGTCATAGGTATAG  
TTGAATCAAGTATCAAGCGTGGAAATGCATATTGAAGCTCTTGAAGTGGTTTATACCTTTGGCATGGAGGATAAGTTTTCA  
GCTGCTCTAGTTCTAACTTATTCTTAAAGATGAGCAAGGAGTCAATTTGAGAGGGCAAACCGAAAGCCAGTCAACCGCT  
GGCATTTGTATGAACCCTTCCCTTGACATTATGTACCTTTATGAACTCTTTATCATCATCTGAGTCTGACCATTGATAT  
ATTTATTTCTCAACAGAAAGAAGCGGCTACAAAGCAGCTAGCTGTGTTATCATCAGTTATGCAGTGTATGGAGACTCACA  
AGTTAGATCCTGCGAAAGAAGTACCAGGATGGCAGATCAAAGAGCAAATGTTAGCTTGGAGAAAGACTCTTCAGCTC  
GACAAAGAGATGGAAGAGAAAGCAAGATCTCTCAGTTAATGGAGGAAGCCGCACTTGCCAAGAGAATGTATAACCAACA  
GATAAACGTTCCAAGGTTGTCACCCATGGAATGCCACCAGTAACTTCTTCATCGTATTCTCCTATCTACCGTGATAGAA  
GCTTTCTAGTCAAAGAGACGATGACCAAGATGAAATATCAGCTCTTGTGAGTAGTTACCTCGGCCCGTCAACATCTTTT  
CCTCATCGCTCAAGAAGATCCCCGGAATATATGTTTCCACTTCCACATGGTGGGTTAGGAAGAAGTGTATATGCATATGA  
ACATCTGGCCCCAAATTCATACTCTCCAGGTCACGGACATAGACTTTCATCGACAGTACTCTCCGCTTTGGTTACCGGAC  
AGAGACATCCACTACAGTACTCTCCTCAATTCATGGACAACAACAGTTACCATATGGTATACAAAGGGTTTACAGACAT  
TCACCATCTGAAGAAAGATATTTGGGTTTATCCAATCAAAGGTCTCCTCGCAGTAACTCATATTAGACCCCAAATAGGA  
GGAATGTAATTTGTAACAAAGCTTTTTGTTTTGCTTAAAGTTAGTCATTTATTTAACTCCCAACAGTCTCAAATTTAA  
TTAATGTTTGGGGCTTAAAGAATGCAAATTTTTGCTCCTGTAATTGACATTTAAGATGCTAATGTTATTGCTTCAGAG  
GTTTTAGTCAACCTCAGATACATCGATATCACTATCTAAATAGACCTCTGGCTCTTGGTCACTGGATTCTTTCATCTT  
CTGTCTCTGTTCTTCTGTTCTCGTTGCACTGCTCGAGCAATTGCGGATTCCAACCTTGTGCTTACAGTTTCCATGAC  
ACAAGCTTTTCCATGAATGTATTTATGTCCGCTTCTTATCTTCTTGGGAAGATGAATTC

>FRI\_Van-0

GGATCCCAAAATCTAGTGCCGCCGAGTCCTTTGGGACACAGTTTCGCACTTATCATTGATTTCGGCAAGCAGTAACTCGC

AAAATCCGACCACCGTGAAACATACTCCGGCGCTGAACGCTAGACGCAAAATCCATATTACAGCTGCAGAAAGACGGAG  
AGAACAAGAGACTGACCGATCATAAGAGAAGAGAGCTTCAAGGCTTCAGCTGATGAAGAATCAATGGCGGCGAGAGAGAG  
TGAGAATCGAGTAGTTACTGAGAGGAAGATGAAACGTATCTCCTGAGAAAAACGTAAGAGAGTCCGTTTCAACAGTAT  
TTTTCTCGGCGGTCTTCAGATTTCCGTCCAACCTCTCTCTTTCTCTTTTCAGTTTTTTTTGCCCAATCACTCGTGGTAGG  
ATTTTTATAAGAAAGTTACGAAAATGCCCTCTCGTGCTTAGAGAGATTCAATTCGTGCACATATAATATGCCGTGAATA  
TACCACCAACTCTCTTACTCGTACTCGCATGTGGTGCGTGCAATATACACGTGGTTTCAATCAACGGCTACGTTTTACTG  
ATAGGTGGCTCGTTTAGTTTTGCACTGCCTTTGGGTGCGCGTGACCAAGTCATTTTCCAATGTGTTTTAATATTTGTGA  
ACTATTATAAATAAAAAAGCGAGCGACGTTGTTCTTTGATGAGGGAACGACCGTACGCTTGGCGACCTTCTCTGATTGCG  
TAGAGTCGTTTTCTTATTGGGCTTACCTAGTACCGTCAGCCACAATGTTTTCAATTTCTTTCCACCTAAAACTAAAAAG  
TACTACAAGTCACAACCTAAACCAAGTACACAAGGATTTTATCATGGGATTATCGTGTTTGAAGACTAAAAAGAGCACA  
CCATCACCCCATTAGTGAGGTAGAGTAAGACAGTAACTTTGGGTTTCAATTACCGAGCAAGAACCGTTATTTGTGAT  
TAGACATGTTATAAACCCTGCTTTAGTGACTATTTAAAAAATATATTACATGTCGTAATCATGCAACCTAACTATGTT  
TTCATTAATCAAATACAAAGAATAAAGAGAAAAGTGCCTAGATTCAATTTTGGCATAGACTCAAAAGAGTGTATATAT  
ATCTGACTTTTTATTAATTTATAAACACAAATACATATTTTATAAGCAAAACTATAAAAGCCCTAAACATATAATGATT  
ACCTCAAAGGAAAAAGTCGTTTTCTCCTAATTAAGATAGGTTACTTCTAATTAATATATAATTTATGTGAACCTCAC  
AATATACAGTTCAATAAAATTTGGTAATTTGACCGATTTAAGGAGAGTGGAATTAGGGCTTCTGCAATCTTTTTCTTC  
GCCGCAATCTCATGTCCAATTATCCACCGACGGTGCGCGCAACCCACAACGACGGCGAATCCACTGCTGCAGCGACAT  
CAATCTGAACAGCGACGAAGAGAATTACCGAAGATTGTCGAAACAGAGTCTACAAGTATGGACATTACGATCGGTCAATC  
TAAGCAGCCTCAATTTTTGAAATCCATAGACGAATTAGCTGCGTTTTAGTTGCAAGTGGAAACATTCAAACGCCAATTCG  
ATGATATTCAGAAGCACATCGAGTCAATCGAAAACGCAATTGATTCCAAACTCGAGAGTAACGGCGTTGCTCCTCGCCGCG  
CGGAACAATAATTTCCATCAGCCGATGTTATCGCTCCGCGGAACAATGTATCTGTAGAAACCACCGTCACTGTGAGCCA  
ACCGTCTCAGGAGATTGTACCGGAGACGTGGAATAAACCGGAGGGGGGACGTATGTGTGAGTTGATGTGTAGCAAAGGTC  
TGCGTAAATACATACGCGAATATCTCTGATCAAGCTAAGTTAATGGAAGAGATTCTTCAGCTTTGAAATTTGGCCAAG  
GAGCCAGCGAAGTTGTATTGGATTGTATTGGCAAGTTTACTTACAAGGGCGTAGAGCATTACTAAAGAGTCGCCTAT  
GAGCTCTGCGAGACAAGTTTCGCTTCTTATACTGGAGTCTTTTCTTAATGCCTGATCGTGGTAAAGGGAAGGTGAAGA  
TTGAGAGTTGGATTAAGATGAGGCGGAGACGGCTGCTGTTGCTTGGAGGAAAAGGTTGATGACTGAAGGAGGATTAGCT  
GCGGCTGAGAAAATGGATGCAAGGGGTTTCTTTACTAGTTGCTTGTGTTGGTGTTCCTTCAAACCTTAGGAGTACAGA  
TTTGCTGGATTTGATAAGGATGAGTGGTTTCAATGAGATTGCCGGTCTTTGAAGCGGTCACAGTTTCTGTCCCTATGG  
TCTCAGGTACCATATTCTGTCTCACTCGGTGAATTTTATTGCAAAGGTGGTTCCTTTTGTGACATCATCGACCAACAT  
CAAGTTCCATCTTTGTTTTCGATAAGCTTGTATGGTATAAACTAGGAGAGCACATCAAATATTTAGAGTGAATGACTGA  
TTGAGCCAAATCCTAGCTAGAAATTAATCTGGAAGAAGTGGAACTCTCAACCATAGGTTTTGGTACGAAATTTGTTGCT  
TGTCAGAACCAATGATAGGCTATTGCCTTGAATAGTGTCTTGTGGTTTTCCAATATTGGAAGTTAAAATCATATGAC  
TTAGCTGTTGGATACTAATTAAGCTTAAGCAATGCCAACTCTAAGAAGTGGTACTTACACAATATTCTATTGGTCATAGG  
TATAGTTGAATCAAGTATCAAGCGTGAATGCATATTGAAGCTCTTGAGATGGTTTATACCTTTGGCATGGAGGATAAGT  
TTTCAGCTGCTCTAGTTCTAACTTCACTTAAAGATGAGCAAGGAGTCATTTGAGAGGGCAAAACGGAAAGCCCAGTCA  
CCGCTGGCATTGATGAACCTTCCCTTGCACATTATGTACCTTATGAACTCTTTATCATCATCTGAGTCTGACCATT  
GATATATTTATTTCTCAACAGAAAGAAGCGGCTACAAAGCAGCTAGCTGTGTTATCATCAGTTATGCAGTGTATGGAGAC  
TCACAAGTTAGATCCTGCGAAAGAAGTACCAGGATGGCAGATCAAAGAGCAAATGTTAGCTTGGAGAAAGACACTCTTC  
AGCTCGACAAAAGAGATGGAAGAGAAAGCAAGATCTCTCAGTTAATGGAGGAAGCCGCACTTGCCAAGAGAATGTATAAC  
CAACAGATAAAACGTCCAAGGTTGCACCCATGGAATGCCACCAGTAACTTCTTCATCATATTCTCTATCTACCGTGA  
TAGAAGCTTTCCTAGTCAAAGAGACGATGACCAAGATGAAATATCAGCTCTTGTGAGTAGTTACCTCGGCCCGTCAACAT  
CTTTCTCATCGCTCAAGAAGATCCCCGGAATATATGGTTCCACTTCCACATGGTGGGTTAGGAAGAAGTGTATATGCA  
TATGAACATCTGGCCCAAATTCATACTCTCCAGGTCACGGACATAGACTTATCGACAGTACTCTCCGTCTTTGGTTCA  
CGGACAGAGACATCCACTACAGTACTCTCCTCAATTCATGGACAACAACAGTTACCATATGGTATACAAAGGGTTTACA  
GACATTCACCATCTGAAGAAAGATATTTGGGTTTATCCAATCAAAGGTCTCCTCGCAGTAACTCATATTAGACCCAAA  
TAGGAGGAATGTAATTTGTAACAAAGCTTTTTGTTTTGCTTAAAGTTAGTCAATTTAATTAACCTCCCAACAGTCTCAAAA  
TTAATTTAATGTTTGGGGCTTAAAGAAATGCAATTTTTTCTCTGTAATTGACATTTAAGATGCTAATGTTATTGCTT  
CAGAGGTTTTAGTCAACCTCAGATACATCGATCACTATCTAAATAGACCTGGCTCTTGGTCTGTTGATTCTCTTC  
ATCTTCTGTCTCTGTTCTTCTGTTCTCGTTGCACTGCTCGAGCAATTGCGGATCCAACCTTGTGCTTACAGTTTCCC  
ATGACACAAGCTTTTCCATGAATGATTTATGTCCGCCTTCTTATCTTTCTTGGGAAGATGAATTC
