# Supplementary material for: Functional Analysis of FRIGIDA Using Naturally Occurring Variation in Arabidopsis thaliana
Source: bioRxiv or medRxiv preprint supplement (doi:10.1101/677468), 2019-06-30
Supplement: Supplementary file [file media-5.pdf]

**Supplementary Material 4.** ClustalW alignment of *FRI* alleles cloned and sequenced in this work.

CLUSTAL O(1.2.4) multiple sequence alignment

|             |                                                              |     |
|-------------|--------------------------------------------------------------|-----|
| FRI_An-1    | GGATCCCAAAATCTAGTGCCGCCGAGTCCTTTGGGACACAGTTTCGCACTTATCATTCGA | 60  |
| FRI_Pro-0   | GGATCCCAAAATCTAGTGCCGCCGAGTCCTTTGGGACACAGTTTCGCACTTATCATTCGA | 60  |
| FRI_Bå1-2   | GGATCCCAAAATCTAGTGCCGCCGAGTCCTTTGGGACACAGTTTCGCACTTATCATTCGA | 60  |
| FRI_St-0    | GGATCCCAAAATCTAGTGCCGCCGAGTCCTTTGGGACACAGTTTCGCACTTATCATTCGA | 60  |
| FRI_Bg-2    | GGATCCCAAAATCTAGTGCCGCCGAGTCCTTTGGGACACAGTTTCGCACTTATCATTCGA | 60  |
| FRI_C24     | GGATCCCAAAATCTAGTGCCGCCGAGTCCTTTGGGACACAGTTTCGCACTTATCATTCGA | 60  |
| FRI_Van-0   | GGATCCCAAAATCTAGTGCCGCCGAGTCCTTTGGGACACAGTTTCGCACTTATCATTCGA | 60  |
| FRI_Ull-2-3 | GGATCCCAAAATCTAGTGCCGCCGAGTCCTTTGGGACACAGTTTCGCACTTATCATTCGA | 60  |
| FRI_Lip-0   | GGATCCCAAAATCTAGTGCCGCCGAGTCCTTTGGGACACAGTTTCGCACTTATCATTCGA | 60  |
| FRI_NFA-8   | GGATCCCAAAATCTAGTGCCGCCGAGTCCTTTGGGACACAGTTTCGCACTTATCATTCGA | 60  |
| FRI_Edi-0   | GGATCCCAAAATCTAGTGCCGCCGAGTCCTTTGGGACACAGTTTCGCACTTATCATTCGA | 60  |
| FRI_Ren-1   | GGATCCCAAAATCTAGTGCCGCCGAGTCCTTTGGGACACAGTTTCGCACTTATCATTCGA | 60  |
| FRI_Nok-3   | GGATCCCAAAATCTAGTGCCGCCGAGTCCTTTGGGACACAGTTTCGCACTTATCATTCGA | 60  |
| FRI_Sha     | GGATCCCAAAATCTAGTGCCGCCGAGTCCTTTGGGACACAGTTTCGCACTTATCATTCGA | 60  |
| FRI_Wa-1    | GGATCCCAAAATCTAGTGCCGCCGAGTCCTTTGGGACACAGTTTCGCACTTATCATTCGA | 60  |
| FRI_Spr-1-6 | GGATCCCAAAATCTAGTGCCGCCGAGTCCTTTGGGACACAGTTTCGCACTTATCATTCGA | 60  |
| FRI_Bil-7   | GGATCCCAAAATCTAGTGCCGCCGAGTCCTTTGGGACACAGTTTCGCACTTATCATTCGA | 60  |
| FRI_Alc-0   | GGATCCCAAAATCTAGTGCCGCCGAGTCCTTTGGGACACAGTTTCGCACTTATCATTCGA | 60  |
| FRI_Pu-2-23 | GGATCCCAAAATCTAGTGCCGCCGAGTCCTTTGGGACACAGTTTCGCACTTATCATTCGA | 60  |
| FRI_NFA-10  | GGATCCCAAAATCTAGTGCCGCCGAGTCCTTTGGGACACAGTTTCGCACTTATCATTCGA | 60  |
| FRI_Cvi-0   | GGATCCCAAAATCTAGTGCCGCCGAGTCCTTTGGGACACAGTTTCGCACTTATCATTCGA | 60  |
| FRI_Zdr-6   | GGATCCCAAAATCTAGTGCCGCCGAGTCCTTTGGGACACAGTTTCGCACTTATCATTCGA | 60  |
|             | *****                                                        |     |
| FRI_An-1    | TTCGGCAAGCAGTAAGTTCGCAAAATCCGCACCACCGTGAACATACTCTGGCGCTGAACG | 120 |
| FRI_Pro-0   | TTCGGCAAGCAGTAAGTTCGCAAAATCCGCACCACCGTGAACATACTCTGGCGCTGAACG | 120 |
| FRI_Bå1-2   | TTCGGCAAGCAGTAAGTTCGCAAAATCCGCACCACCGTGAACATACTCTGGCGCTGAACG | 120 |
| FRI_St-0    | TTCGGCAAGCAGTAAGTTCGCAAAATCCGCACCACCGTGAACATACTCTGGCGCTGAACG | 120 |
| FRI_Bg-2    | TTCGGCAAGCAGTAAGTTCGCAAAATCCGCACCACCGTGAACATACTCTGGCGCTGAACG | 120 |
| FRI_C24     | TTCGGCAAGCAGTAAGTTCGCAAAATCCGCACCACCGTGAACATACTCTGGCGCTGAACG | 120 |
| FRI_Van-0   | TTCGGCAAGCAGTAAGTTCGCAAAATCCGCACCACCGTGAACATACTCTGGCGCTGAACG | 120 |
| FRI_Ull-2-3 | TTCGGCAAGCAGTAAGTTCGCAAAATCCGCACCACCGTGAACATACTCTGGCGCTGAACG | 120 |
| FRI_Lip-0   | TTCGGCAAGCAGTAAGTTCGCAAAATCCGCACCACCGTGAACATACTCTGGCGCTGAACG | 120 |
| FRI_NFA-8   | TTCGGCAAGCAGTAAGTTCGCAAAATCCGCACCACCGTGAACATACTCTGGCGCTGAACG | 120 |
| FRI_Edi-0   | TTCGGCAAGCAGTAAGTTCGCAAAATCCGCACCACCGTGAACATACTCTGGCGCTGAACG | 120 |
| FRI_Ren-1   | TTCGGCAAGCAGTAAGTTCGCAAAATCCGCACCACCGTGAACATACTCTGGCGCTGAACG | 120 |
| FRI_Nok-3   | TTCGGCAAGCAGTAAGTTCGCAAAATCCGCACCACCGTGAACATACTCTGGCGCTGAACG | 120 |
| FRI_Sha     | TTCGGCAAGCAGTAAGTTCGCAAAATCCGCACCACCGTGAACATACTCTGGCGCTGAACG | 120 |
| FRI_Wa-1    | TTCGGCAAGCAGTAAGTTCGCAAAATCCGCACCACCGTGAACATACTCTGGCGCTGAACG | 120 |
| FRI_Spr-1-6 | TTCGGCAAGCAGTAAGTTCGCAAAATCCGCACCACCGTGAACATACTCTGGCGCTGAACG | 120 |
| FRI_Bil-7   | TTCGGCAAGCAGTAAGTTCGCAAAATCCGCACCACCGTGAACATACTCTGGCGCTGAACG | 120 |
| FRI_Alc-0   | TTCGGCAAGCAGTAAGTTCGCAAAATCCGCACCACCGTGAACATACTCTGGCGCTGAACG | 120 |
| FRI_Pu-2-23 | TTCGGCAAGCAGTAAGTTCGCAAAATCCGCACCACCGTGAACATACTCTGGCGCTGAACG | 120 |
| FRI_NFA-10  | TTCGGCAAGCAGTAAGTTCGCAAAATCCGCACCACCGTGAACATACTCTGGCGCTGAACG | 120 |
| FRI_Cvi-0   | TTCGGCAAGCAGTAAGTTCGCAAAATCCGCACCACCGTGAACATACTCTGGCGCTGAACG | 120 |
| FRI_Zdr-6   | TTCGGCAAGCAGTAAGTTCGCAAAATCCGCACCACCGTGAACATACTCTGGCGCTGAACG | 120 |
|             | *****                                                        |     |
| FRI_An-1    | CTAGACGCAAAATCCATATTACTGCTGCAGAAAGACGGAGAGAACAAGAGACTGACCGAT | 180 |
| FRI_Pro-0   | CTAGACGCAAAATCCATATTACAGCTGCAGAAAGACGGAGAGAACAAGAGACTGACCGAT | 180 |
| FRI_Bå1-2   | CTAGACGCAAAATCCATATTACTGCTGCAGAAAGACGGAGAGAACAAGAGACTGACCGAT | 180 |
| FRI_St-0    | CTAGACGCAAAATCCATATTACTGCTGCAGAAAGACGGAGAGAACAAGAGACTGACCGAT | 180 |
| FRI_Bg-2    | CTAGACGCAAAATCCATATTACAGCTGCAGAAAGACGGAGAGAACAAGAGACTGACCGAT | 180 |
| FRI_C24     | CTAGACGCAAAATCCATATTACTGCTGCAGAAAGACGGAGAGAACAAGAGACTGACCGAT | 180 |
| FRI_Van-0   | CTAGACGCAAAATCCATATTACAGCTGCAGAAAGACGGAGAGAACAAGAGACTGACCGAT | 180 |
| FRI_Ull-2-3 | CTAGACGCAAAATCCATATTACTGCTGCAGAAAGACGGAGAGAACAAGAGACTGACCGAT | 180 |
| FRI_Lip-0   | CTAGACGCAAAATCCATATTACTGCTGCAGAAAGACGGAGAGAACAAGAGACTGACCGAT | 180 |
| FRI_NFA-8   | CTAGACGCAAAATCCATATTACTGCTGCAGAAAGACGGAGAGAACAAGAGACTGACCGAT | 180 |
| FRI_Edi-0   | CTAGACGCAAAATCCATATTACTGCTGCAGAAAGACGGAGAGAACAAGAGACTGACCGAT | 180 |
| FRI_Ren-1   | CTAGACGCAAAATCCATATTACTGCTGCAGAAAGACGGAGAGAACAAGAGACTGACCGAT | 180 |
| FRI_Nok-3   | CTAGACGCAAAATCCATATTACTGCTGCAGAAAGACGGAGAGAACAAGAGACTGACCGAT | 180 |
| FRI_Sha     | CTAGACGCAAAATCCATATTACTGCTGCAGAAAGACGGAGAGAACAAGAGACTGACCGAT | 180 |
| FRI_Wa-1    | CTAGACGCAAAATCCATATTACAGCTGCAGAAAGACGGAGAGAACAAGAGACTGACCGAT | 180 |
| FRI_Spr-1-6 | CTAGACGCAAAATCCATATTACTGCTGCAGAAAGACGGAGAGAACAAGAGACTGACCGAT | 180 |
| FRI_Bil-7   | CTAGACGCAAAATCCATATTACTGCTGCAGAAAGACGGAGAGAACAAGAGACTGACCGAT | 180 |
| FRI_Alc-0   | CTAGACGCAAAATCCATATTACTGCTGCAGAAAGACGGAGAGAACAAGAGACTGACCGAT | 180 |

FRI\_Pu-2-23 CTAGACGCAAAATCCATATTACTGCTGCAGAAAGACGGAGAGAACAAGAGACTGACCGAT 180  
FRI\_NFA-10 CTAGACGCAAAATCCATATTACAGCTGCAGAAAGACGGAGAGAACAAGAGACTGACCGAT 180  
FRI\_Cvi-0 CTAGACGCAAAATCCATATTACTGCTGCAGAAAGACGGAGAGAACAAGAGACTGACCGAT 180  
FRI\_Zdr-6 CTAGACGCAAAATCCATATTACTGCTGCAGAAAGACGGAGAGAACAAGAGACTGACCGAT 180  
\*\*\*\*\*

FRI\_An-1 CATAAGAGAAGAGAGCTTCAAGGCTTCAGCTGATGAAGAATCAATGGCGGCGAGAGTGAG 240  
FRI\_Pro-0 CATAAGAGAAGAGAGCTTCAAGGCTTCAGCTGATGAAGAATCAATGGCGGCGAGAGAGAG 240  
FRI\_Bâ1-2 CATAAGAGAAGAGAGCTTCAAGGCTTCAGCTGATGAAGAATCAATGGCGGCGAGAGTGAG 240  
FRI\_St-0 CATAAGAGAAGAGAGCTTCAAGGCTTCAGCTGATGAAGAATCAATGGCGGCGAGAGAGAG 240  
FRI\_Bg-2 CATAAGAGAAGAGAGCTTCAAGGCTTCAGCTGATGAAGAATCAATGGCGGCGAGAGAGAG 240  
FRI\_C24 CATAAGAGAAGAGAGCTTCAAGGCTTCAGCTGATGAAGAATCAATGGCGGCGAGAGAGAG 240  
FRI\_Van-0 CATAAGAGAAGAGAGCTTCAAGGCTTCAGCTGATGAAGAATCAATGGCGGCGAGAGAGAG 240  
FRI\_U11-2-3 CATAAGAGAAGAGAGCTTCAAGGCTTCAGCTGATGAAGAATCAATGGCGGCGAGAGAGAG 240  
FRI\_Lip-0 CATAAGAGAAGAGAGCTTCAAGGCTTCAGCTGATGAAGAATCAATGGCGGCGAGAGAGAG 240  
FRI\_NFA-8 CATAAGAGAAGAGAGCTTCAAGGCTTCAGCTGATGAAGAATCAATGGCGGCGAGAGTGAG 240  
FRI\_Edi-0 CATAAGAGAAGAGAGCTTCAAGGCTTCAGCTGATGAAGAATCAATGGCGGCGAGAGTGAG 240  
FRI\_Ren-1 CATAAGAGAAGAGAGCTTCAAGGCTTCAGCTGATGAAGAATCAATGGCGGCGAGAGTGAG 240  
FRI\_Nok-3 CATAAGAGAAGAGAGCTTCAAGGCTTCAGCTGATGAAGAATCAATGGCGGCGAGAGTGAG 240  
FRI\_Sha CATAAGAGAAGAGAGCTTCAAGGCTTCAGCTGATGAAGAATCAATGGCGGCGAGAGTGAG 240  
FRI\_Wa-1 CATAAGAGAAGAGAGCTTCAAGGCTTCAGCTGATGAAGAATCAATGGCGGCGAGAGTGAG 240  
FRI\_Spr-1-6 CATAAGAGAAGAGAGCTTCAAGGCTTCAGCTGATGAAGAATCAATGGCGGCGAGAGTGAG 240  
FRI\_Bil-7 CATAAGAGAAGAGAGCTTCAAGGCTTCAGCTGATGAAGAATCAATGGCGGCGAGAGAGAG 240  
FRI\_Alc-0 CATAAGAGAAGAGAGCTTCAAGGCTTCAGCTGATGAAGAATCAATGGCGGCGAGAGAGAG 240  
FRI\_Pu-2-23 CATAAGAGAAGAGAGCTTCAAGGCTTCAGCTGATGAAGAATCAATGGCGGCGAGAGAGAG 240  
FRI\_NFA-10 CATAAGAGAAGAGAGCTTCAAGGCTTCAGCTGATGAAGAATCAATGGCGGCGAGAGAGAG 240  
FRI\_Cvi-0 CATAAGAGAAGAGAGCTTCAAGGCTTCAGCTGATGAAGAATCAATGGCGGCGAGAGAGAG 240  
FRI\_Zdr-6 CATAAGAGAAGAGAGCTTCAAGGCTTCAGCTGATGAAGAATCAATGGCGGCGAGAGAGAG 240  
\*\*\*\*\*

FRI\_An-1 TGAGAAATCGAGTAGTTACTGAGAGGAAGATGAAACGTATCTCCTGAGAAAAACGTAAGA 300  
FRI\_Pro-0 TGAGAAATCGAGTAGTTACTGAGAGGAAGATGAAACGTATCTCCTGAGAAAAACGTAAGA 300  
FRI\_Bâ1-2 TGAGAAATCGAGTAGTTACTGAGAGGAAGATGAAACGTATCTCCTGAGAAAAACGTAAGA 300  
FRI\_St-0 TGAGAAATCGAGTAGTTACTGAGAGGAAGATGAAACGTATCTCCTGAGAAAAACGTAAGA 300  
FRI\_Bg-2 TGAGAAATCGAGTAGTTACTGAGAGGAAGATGAAACGTATCTCCTGAGAAAAACGTAAGA 300  
FRI\_C24 TGAGAAATCGAGTAGTTACTGAGAGGAAGATGAAACGTATCTCCTGAGAAAAACGTAAGA 300  
FRI\_Van-0 TGAGAAATCGAGTAGTTACTGAGAGGAAGATGAAACGTATCTCCTGAGAAAAACGTAAGA 300  
FRI\_U11-2-3 TGAGAAATCGAGTAGTTACTGAGAGGAAGATGAAACGTATCTCCTGAGAAAAACGTAAGA 300  
FRI\_Lip-0 TGAGAAATCGAGTAGTTACTGAGAGGAAGATGAAACGTATCTCCTGAGAAAAACGTAAGA 300  
FRI\_NFA-8 TGAGAAATCGAGTAGTTACTGAGAGGAAGATGAAACGTATCTCCTGAGAAAAACGTAAGA 300  
FRI\_Edi-0 TGAGAAATCGAGTAGTTACTGAGAGGAAGATGAAACGTATCTCCTGAGAAAAACGTAAGA 300  
FRI\_Ren-1 TGAGAAATCGAGTAGTTACTGAGAGGAAGATGAAACGTATCTCCTGAGAAAAACGTAAGA 300  
FRI\_Nok-3 TGAGAAATCGAGTAGTTACTGAGAGGAAGATGAAACGTATCTCCTGAGAAAAACGTAAGA 300  
FRI\_Sha TGAGAAATCGAGTAGTTACTGAGAGGAAGATGAAACGTATCTCCTGAGAAAAACGTAAGA 300  
FRI\_Wa-1 TGAGAAATCGAGTAGTTACTGAGAGGAAGATGAAACGTATCTCCTGAGAAAAACGTAAGA 300  
FRI\_Spr-1-6 TGAGAAATCGAGTAGTTACTGAGAGGAAGATGAAACGTATCTCCTGAGAAAAACGTAAGA 300  
FRI\_Bil-7 TGAGAAATCGAGTAGTTACTGAGAGGAAGATGAAACGTATCTCCTGAGAAAAACGTAAGA 300  
FRI\_Alc-0 TGAGAAATCGAGTAGTTACTGAGAGGAAGATGAAACGTATCTCCTGAGAAAAACGTAAGA 300  
FRI\_Pu-2-23 TGAGAAATCGAGTAGTTACTGAGAGGAAGATGAAACGTATCTCCTGAGAAAAACGTAAGA 300  
FRI\_NFA-10 TGAGAAATCGAGTAGTTACTGAGAGGAAGATGAAACGTATCTCCTGAGAAAAACGTAAGA 300  
FRI\_Cvi-0 TGAGAAATCGAGTAGTTACTGAGAGGAAGATGAAACGTATCTCCTGAGAAAAACGTAAGA 300  
FRI\_Zdr-6 TGAGAAATCGAGTAGTTACTGAGAGGAAGATGAAACGTATCTCCTGAGAAAAACGTAAGA 300  
\*\*\*\*\*

FRI\_An-1 GAGTTCGGTTTCAACAGTATTTTTCTCGGCGGTCTTCAGATTTTCCGTCCAACCTCTCTCT 360  
FRI\_Pro-0 GAGTTCGGTTTCAACAGTATTTTTCTCGGCGGTCTTCAGATTTTCCGTCCAACCTCTCTCT 360  
FRI\_Bâ1-2 GAGTTCGGTTTCAACAGTATTTTTCTCGGCGGTCTTCAGATTTTCCGTCCAACCTCTCTCT 360  
FRI\_St-0 GAGTTCGGTTTCAACAGTATTTTTCTCGGCGGTCTTCAGATTTTCCGTCCAACCTCTCTCT 360  
FRI\_Bg-2 GAGTTCGGTTTCAACAGTATTTTTCTCGGCGGTCTTCAGATTTTCCGTCCAACCTCTCTCT 360  
FRI\_C24 GAGTTCGGTTTCAACAGTATTTTTCTCGGCGGTCTTCAGATTTTCCGTCCAACCTCTCTCT 360  
FRI\_Van-0 GAGTTCGGTTTCAACAGTATTTTTCTCGGCGGTCTTCAGATTTTCCGTCCAACCTCTCTCT 360  
FRI\_U11-2-3 GAGTTCGGTTTCAACAGTATTTTTCTCGGCGGTCTTCAGATTTTCCGTCCAACCTCTCTCT 360  
FRI\_Lip-0 GAGTTCGGTTTCAACAGTATTTTTCTCGGCGGTCTTCAGATTTTCCGTCCAACCTCTCTCT 360  
FRI\_NFA-8 GAGTTCGGTTTCAACAGTATTTTTCTCGGCGGTCTTCAGATTTTCCGTCCAACCTCTCTCT 360  
FRI\_Edi-0 GAGTTCGGTTTCAACAGTATTTTTCTCGGCGGTCTTCAGATTTTCCGTCCAACCTCTCTCT 360  
FRI\_Ren-1 GAGTTCGGTTTCAACAGTATTTTTCTCGGCGGTCTTCAGATTTTCCGTCCAACCTCTCTCT 360  
FRI\_Nok-3 GAGTTCGGTTTCAACAGTATTTTTCTCGGCGGTCTTCAGATTTTCCGTCCAACCTCTCTCT 360  
FRI\_Sha GAGTTCGGTTTCAACAGTATTTTTCTCGGCGGTCTTCAGATTTTCCGTCCAACCTCTCTCT 360  
FRI\_Wa-1 GAGTTCGGTTTCAACAGTATTTTTCTCGGCGGTCTTCAGATTTTCCGTCCAACCTCTCTCT 360  
FRI\_Spr-1-6 GAGTTCGGTTTCAACAGTATTTTTCTCGGCGGTCTTCAGATTTTCCGTCCAACCTCTCTCT 360  
FRI\_Bil-7 GAGTTCGGTTTCAACAGTATTTTTCTCGGCGGTCTTCAGATTTTCCGTCCAACCTCTCTCT 360

FRI\_Alc-0 GAGTTCGGTTTCAACAGTATTTTCTCGGGCGTCTTCAGATTTTCCGTCCAACCTCTCTCT 360  
FRI\_Pu-2-23 GAGTTCGGTTTCAACAGTATTTTCTCGGGCGTCTTCAGATTTTCCGTCCAACCTCTCTCT 360  
FRI\_NFA-10 GAGTTCGGTTTCAACAGTATTTTCTCGGGCGTCTTCAGATTTTCCGTCCAACCTCTCTCT 360  
FRI\_Cvi-0 GAGTTCGGTTTCAACAGTATTTTCTCGGGCGTCTTCAGATTTTCCGTCCAACCTCTCTCT 360  
FRI\_Zdr-6 GAGTTCGGTTTCAACAGTATTTTCTCGGGCGTCTTCAGATTTTCCGTCCAACCTCTCTCT 360  
\*\*\*\*\*

FRI\_An-1 TTCCTCTTTCAGTTTTTTTTGCCCCAATCACTCGTGGTAGGATTTTTTTATAAGAAAGTT 420  
FRI\_Pro-0 TTCCTCTTTCAGTTTTTTTTGCCCCAATCACTCGTGGTAGGATTT-TTTATAAGAAAGTT 419  
FRI\_Bâ1-2 TTCCTCTTTCAGTTTTTTTTGCCCCAATCACTCGTGGTAGGATTTTTTTATAAGAAAGTT 420  
FRI\_St-0 TTCCTCTTTCAGTTTTTTTTGCCC-CAATCACTCGTGGTAGG-ATTTTTTATAAGAAAGTT 418  
FRI\_Bg-2 TTCCTCTTTCAGTTTTTTTTGCCC-CAATCACTCGTGGTAGG-ATTTTTTATAAGAAAGTT 418  
FRI\_C24 TTCCTCTTTCAGTTTTTTTTGCCC-CAATCACTCGTGGTAGG-ATTTTTTATAAGAAAGTT 418  
FRI\_Van-0 TTCCTCTTTCAGTTTTTTTTGCCC-CAATCACTCGTGGTAGG-ATTTTTTATAAGAAAGTT 418  
FRI\_U11-2-3 TTCCTCTTTCAGTTTTTTTTGCG-CCAATCACTCGTGGTAGG-ATTTTTTATAAGAAAGTT 418  
FRI\_Lip-0 TTCCTCTTTCAGTTTTTTTTGCG-CCAATCACTCGTGGTAGG-ATTTTTTATAAGAAAGTT 418  
FRI\_NFA-8 TTCCTCTTTCAGTTTTTTTTGCCCCAATCACTCGTGGTAGGATTTTTTTATAAGAAAGTT 420  
FRI\_Edi-0 TTCCTCTTTCAGTTTTTTTTGCCCCAATCACTCGTGGTAGGATTTTTTTATAAGAAAGTT 420  
FRI\_Ren-1 TTCCTCTTTCAGTTTTTTTTGCCCCAATCACTCGTGGTAGGATTTTTTTATAAGAAAGTT 420  
FRI\_Nok-3 TTCCTCTTTCAGTTTTTTTTGCCCCAATCACTCGTGGTAGGATTTTTTTATAAGAAAGTT 420  
FRI\_Sha TTCCTCTTTCAGTTTTTTTTGCCCCAATCACTCGTGGTAGGATTTTTTTATAAGAAAGTT 420  
FRI\_Wa-1 TTCCTCTTTCAGTTTTTTTTGCCCCAATCACTCGTGGTAGGATTTTTTTATAAGAAAGTT 420  
FRI\_Spr-1-6 TTCCTCTTTCAGTTTTTTTTGCCCCAATCACTCGTGGTAGGATTTTTTTATAAGAAAGTT 420  
FRI\_Bil-7 TTCCTCTTTCAGTTTTTTTTGCCCCAATCACTCGTGGTAGGATTTTTTTATAAGAAAGTT 420  
FRI\_Alc-0 TTCCTCTTTCAGTTTTTTTTGCCCCAATCACTCGTGGTAGGATTTTTTTATAAGAAAGTT 420  
FRI\_Pu-2-23 TTCCTCTTTCAGTTTTTTTTGCCCCAATCACTCGTGGTAGGATTTTTTTATAAGAAAGTT 420  
FRI\_NFA-10 TTCCTCTTTCAGTTTTTTTTGCCCCAATCACTCGTGGTAGGATTT-TTTATAAGAAAGTT 419  
FRI\_Cvi-0 TTCCTCTTTCAGTTTTTTTTGCCCCAATCACTCGTGGTAGGATTTTTTTATAAGAAAGTT 420  
FRI\_Zdr-6 TTCCTCTTTCAGTTTTTTTTGCCCCAATCACTCGTGGTAGGATTTTTTTATAAGAAAGTT 420  
\*\*\*\*\*

FRI\_An-1 ACGAAAATGCCCTCTCGTGCTTAGAGAGATTCAATTCGTGCACATATAATATGCCGTGAA 480  
FRI\_Pro-0 ACGAAAATGCCCTCTCGTGCTTAGAGAGATTCAATTCGTGCACATATAATATGCCGTGAA 479  
FRI\_Bâ1-2 ACGAAAATGCCCTCTCGTGCTTAGAGAGATTCAATTCGTGCACATATAATATGCCGTGAA 480  
FRI\_St-0 ACGAAAATGCCCTCTCGTGCTTAGAGAGATTCAATTCGTGCACATATAATATGCCGTGAA 478  
FRI\_Bg-2 ACGAAAATGCCCTCTCGTGCTTAGAGAGATTCAATTCGTGCACATATAATATGCCGTGAA 478  
FRI\_C24 ACGAAAATGCCCTCTCGTGCTTAGAGAGATTCAATTCGTGCACATATAATATGCCGTGAA 478  
FRI\_Van-0 ACGAAAATGCCCTCTCGTGCTTAGAGAGATTCAATTCGTGCACATATAATATGCCGTGAA 478  
FRI\_U11-2-3 ACGAAAATGCCCTCTCGTGCTTAGAGAGATTCAATTCGTGCACATATAATATGCCGTGAA 478  
FRI\_Lip-0 ACGAAAATGCCCTCTCGTGCTTAGAGAGATTCAATTCGTGCACATATAATATGCCGTGAA 478  
FRI\_NFA-8 ACGAAAATGCCCTCTCGTGCTTAGAGAGATTCAATTCGTGCACATATAATATGCCGTGAA 480  
FRI\_Edi-0 ACGAAAATGCCCTCTCGTGCTTAGAGAGATTCAATTCGTGCACATATAATATGCCGTGAA 480  
FRI\_Ren-1 ACGAAAATGCCCTCTCGTGCTTAGAGAGATTCAATTCGTGCACATATAATATGCCGTGAA 480  
FRI\_Nok-3 ACGAAAATGCCCTCTCGTGCTTAGAGAGATTCAATTCGTGCACATATAATATGCCGTGAA 480  
FRI\_Sha ACGAAAATGCCCTCTCGTGCTTAGAGAGATTCAATTCGTGCACATATAATATGCCGTGAA 480  
FRI\_Wa-1 ACGAAAATGCCCTCTCGTGCTTAGAGAGATTCAATTCGTGCACATATAATATGCCGTGAA 480  
FRI\_Spr-1-6 ACGAAAATGCCCTCTCGTGCTTAGAGAGATTCAATTCGTGCACATATAATATGCCGTGAA 480  
FRI\_Bil-7 ACGAAAATGCCCTCTCGTGCTTAGAGAGATTCAATTCGTGACATATAATATGCCGTGAA 480  
FRI\_Alc-0 ACGAAAATGCCCTCTCGTGCTTAGAGAGATTCAATTCGTGCACATATAATATGCCGTGAA 480  
FRI\_Pu-2-23 ACGAAAATGCCCTCTCGTGCTTAGAGAGATTCAATTCGTGCACATATAATATGCCGTGAA 480  
FRI\_NFA-10 ACGAAAATGCCCTCTCGTGCTTAGAGAGATTCAATTCGTGCACATATAATATGCCGTGAA 479  
FRI\_Cvi-0 ACGAAAATGCCCTCTCGTGCTTAGAGAGATTCAATTCGTGCACATATAATATGCCGTGAA 480  
FRI\_Zdr-6 ACGAAAATGCCCTCTCGTGCTTAGAGAGATTCAATTCGTGCACATATAATATGCCGTGAA 480  
\*\*\*\*\*

FRI\_An-1 TATACCACCAACTCTCTTACTCGTACTCGCATGTGGTGCGTGCAATATACACGTGGTTCC 540  
FRI\_Pro-0 TATACCACCAACTCTCTTACTCGTACTCGCATGTGGTGCGTGCAATATACACGTGGTTCC 539  
FRI\_Bâ1-2 TATACCACCAACTCTCTTACTCGTACTCGCATGTGGTGCGTGCAATATACACGTGGTTCC 540  
FRI\_St-0 TATACCACCAACTCTCTTACTCGTACTCGCATGTGGTGCGTGCAATATACACGTGGTTCC 538  
FRI\_Bg-2 TATACCACCAACTCTCTTACTCGTACTCGCATGTGGTGCGTGCAATATATACGTGGTTCC 538  
FRI\_C24 TATACCACCAACTCTCTTACTCGTACTCGCATGTGGTGCGTGCAATATACACGTGGTTCC 538  
FRI\_Van-0 TATACCACCAACTCTCTTACTCGTACTCGCATGTGGTGCGTGCAATATACACGTGGTTCC 538  
FRI\_U11-2-3 TATACCACCAACTCTCTTACTCGTACTCGCATGTGGTGCGTGCAATATACACGTGGTTCC 538  
FRI\_Lip-0 TATACCACCAACTCTCTTACTCGTACTCGCATGTGGTGCGTGCAATATACACGTGGTTCC 538  
FRI\_NFA-8 TATACCACCAACTCTCTTACTCGTACTCGCATGTGGTGCGTGCAATATACACGTGGTTCC 540  
FRI\_Edi-0 TATACCACCAACTCTCTTACTCGTACTCGCATGTGGTGCGTGCAATATACACGTGGTTCC 540  
FRI\_Ren-1 TATACCACCAACTCTCTTACTCGTACTCGCATGTGGTGCGTGCAATATACACGTGGTTCC 540  
FRI\_Nok-3 TATACCACCAACTCTCTTACTCGTACTCGCATGTGGTGCGTGCAATATACACGTGGTTCC 540  
FRI\_Sha TATACCACCAACTCTCTTACTCGTACTCGCATGTGGTGCGTGCAATATACACGTGGTTCC 540  
FRI\_Wa-1 TATACCACCAACTCTCTTACTCGTACTCGCATGTGGTGCGTGCAATATACACGTGGTTCC 540  
FRI\_Spr-1-6 TATACCACCAACTCTCTTACTCGTACTCGCATGTGGTGCGTGCAATATACACGTGGTTCC 540

FRI\_Bil-7 TATACCACCAACTCTCTTACTCGTACTCGCATGTGGTGCCTGCAATATACACGTGGTTCG 540  
FRI\_Alc-0 TATACCACCAACTCTCTTACTCGTACTCGCATGTGGTGCCTGCAATATACACGTGGTTCG 540  
FRI\_Pu-2-23 TATACCACCAACTCTCTTACTCGTACTCGCATGTGGTGCCTGCAATATACACGTGGTTCG 540  
FRI\_NFA-10 TATACCACCAACTCTCTTACTCGTACTCGCATGTGGTGCCTGCAATATACACGTGGTTCG 539  
FRI\_Cvi-0 TATACCACCAACTCTCTTACTCGTACTCGCATGTGGTGCCTGCAATATACACGTGGTTCG 540  
FRI\_Zdr-6 TATACCACCAACTCTCTTACTCGTACTCGCATGTGGTGCCTGCAATATACACGTGGTTCG 540  
\*\*\*\*\*

FRI\_An-1 AATCAACGGCTACGTTTTACTGATAGGTGGCTCGTTTAGTTTTGCACTGCCTTTGGGTGC 600  
FRI\_Pro-0 AATCAACGGCTACGTTTTACTGATAGGTGGCTCGTTTAGTTTTGCACTGCCTTTGGGTGC 599  
FRI\_Bâ1-2 AATCAACGGCTACGTTTTACTGATAGGTGGCTCGTTTAGTTTTGCACTGCCTTTGGGTGC 600  
FRI\_St-0 AATCAACGGCTACGTTTTACTGATAGGTGGCTCGTTTAGTTTTGCACTGCCTTTGGGTGC 598  
FRI\_Bg-2 AATCAACGGCTACGTTTTACTGATAGGTGGCTCGTTTAGTTTTGCACTGCCTTTGGGTGC 598  
FRI\_C24 AATCAACGGCTACGTTTTACTGATAGGTGGCTCGTTTAGTTTTGCACTGCCTTTGGGTGC 598  
FRI\_Van-0 AATCAACGGCTACGTTTTACTGATAGGTGGCTCGTTTAGTTTTGCACTGCCTTTGGGTGC 598  
FRI\_U11-2-3 AATCAACGGCTACGTTTTACTGATAGGTGGCTCGTTTAGTTTTGCACTGCCTTTGGGTGC 598  
FRI\_Lip-0 AATCAACGGCTACGTTTTACTGATAGGTGGCTCGTTTAGTTTTGCACTGCCTTTGGGTGC 598  
FRI\_NFA-8 AATCAACGGCTACGTTTTACTGATAGGTGGCTCGTTTAGTTTTGCACTGCCTTTGGGTGC 600  
FRI\_Edi-0 AATCAACGGCTACGTTTTACTGATAGGTGGCTCGTTTAGTTTTGCACTGCCTTTGGGTGC 600  
FRI\_Ren-1 AATCAACGGCTACGTTTTACTGATAGGTGGCTCGTTTAGTTTTGCACTGCCTTTGGGTGC 600  
FRI\_Nok-3 AATCAACGGCTACGTTTTACTGATAGGTGGCTCGTTTAGTTTTGCACTGCCTTTGGGTGC 600  
FRI\_Sha AATCAACGGCTACGTTTTACTGATAGGTGGCTCGTTTAGTTTTGCACTGCCTTTGGGTGC 600  
FRI\_Wa-1 AATCAACGGCTACGTTTTACTGATAGGTGGCTCGTTTAGTTTTGCACTGCCTTTGGGTGC 600  
FRI\_Spr-1-6 AATCAACGGCTACGTTTTACTGATAGGTGGCTCGTTTAGTTTTGCACTGCCTTTGGGTGC 600  
FRI\_Bil-7 AATCAACGGCTACGTTTTACTGATAGGTGGCTCGTTTAGTTTTGCACTGCCTTTGGGTGC 600  
FRI\_Alc-0 AATCAACGGCTACGTTTTACTGATAGGTGGCTCGTTTAGTTTTGCACTGCCTTTGGGTGC 600  
FRI\_Pu-2-23 AATCAACGGCTACGTTTTACTGATAGGTGGCTCGTTTAGTTTTGCACTGCCTTTGGGTGC 600  
FRI\_NFA-10 AATCAACGGCTACGTTTTACTGATAGGTGGCTCGTTTAGTTTTGCACTGCCTTTGGGTGC 599  
FRI\_Cvi-0 AATCAACGGCTACGTTTTACTGATAGGTGGCTCGTTTAGTTTTGCACTGCCTTTGGGTGC 600  
FRI\_Zdr-6 AATCAACGGCTACGTTTTACTGATAGGTGGCTCGTTTAGTTTTGCACTGCCTTTGGGTGC 600  
\*\*\*\*\*

FRI\_An-1 GCGTGACCAAGTCATTTTCCAAATGTGTTTTAATATTTGTGAACATATTATTAATAAAAAA 660  
FRI\_Pro-0 GCGTGACCAAGTCATTTTCCAAATGTGTTTTAATATTTGTGAACATATTATTAATAAAAAA 659  
FRI\_Bâ1-2 GCGTGACCAAGTCATTTTCCAAATGTGTTTTAATATTTGTGAACATATTATTAATAAAAAA 660  
FRI\_St-0 GCGTGACCAAGTCATTTTCCAAATGTGTTTTAATATTTGTGAACATATTATTAATAAAAAA 658  
FRI\_Bg-2 GCGTGACCAAGTCATTTTCCAAATGTGTTTTAATATTTGTGAACATATTATTAATAAAAAA 658  
FRI\_C24 GCGTGACCAAGTCATTTTCCAAATGTGTTTTAATATTTGTGAACATATTATTAATAAAAAA 658  
FRI\_Van-0 GCGTGACCAAGTCATTTTCCAAATGTGTTTTAATATTTGTGAACATATTATTAATAAAAAA 658  
FRI\_U11-2-3 GCGTGACCAAGTCATTTTCCAAATGTGTTTTAATATTTGTGAACATATTATTAATAAAAAA 658  
FRI\_Lip-0 GCGTGACCAAGTCATTTTCCAAATGTGTTTTAATATTTGTGAACATATTATTAATAAAAAA 658  
FRI\_NFA-8 GCGTGACCAAGTCATTTTCCAAATGTGTTTTAATATTTGTGAACATATTATTAATAAAAAA 660  
FRI\_Edi-0 GCGTGACCAAGTCATTTTCCAAATGTGTTTTAATATTTGTGAACATATTATTAATAAAAAA 660  
FRI\_Ren-1 GCGTGACCAAGTCATTTTCCAAATGTGTTTTAATATTTGTGAACATATTATTAATAAAAAA 660  
FRI\_Nok-3 GCGTGACCAAGTCATTTTCCAAATGTGTTTTAATATTTGTGAACATATTATTAATAAAAAA 660  
FRI\_Sha GCGTGACCAAGTCATTTTCCAAATGTGTTTTAATATTTGTGAACATATTATTAATAAAAAA 660  
FRI\_Wa-1 GCGTGACCAAGTCATTTTCCAAATGTGTTTTAATATTTGTGAACATATTATTAATAAAAAA 660  
FRI\_Spr-1-6 GCGTGACCAAGTCATTTTCCAAATGTGTTTTAATATTTGTGAACATATTATTAATAAAAAA 660  
FRI\_Bil-7 GCGTGACCAAGTCATTTTCCAAATGTGTTTTAATATTTGTGAACATATTATTAATAAAAAA 660  
FRI\_Alc-0 GCGTGACCAAGTCATTTTCCAAATGTGTTTTAATATTTGTGAACATATTATTAATAAAAAA 660  
FRI\_Pu-2-23 GCGTGACCAAGTCATTTTCCAAATGTGTTTTAATATTTGTGAACATATTATTAATAAAAAA 660  
FRI\_NFA-10 GCGTGACCAAGTCATTTTCCAAATGTGTTTTAATATTTGTGAACATATTATTAATAAAAAA 659  
FRI\_Cvi-0 GCGTGACCAAGTCATTTTCCAAATGGGTTTTAATATTTGTGAACATATTATTAATAAAAAA 660  
FRI\_Zdr-6 GCGTGACCAAGTCATTTTCCAAATGTGTTTTAATATTTGTGAACATATTATTAATAAAAAA 660  
\*\*\*\*\*

FRI\_An-1 GCGAGCGACGTTGTTCTTTGATGAGGGAACGACCGTACGCTTGGCGACCTTCTCTGATTG 720  
FRI\_Pro-0 GCGAGCGACGTTGTTCTTTGATGAGGGAACGACCGTACGCTTGGCGACCTTCTCTGATTG 719  
FRI\_Bâ1-2 GCGAGCGACGTTGTTCTTTGATGAGGGAACGACCGTACGCTTGGCGACCTTCTCTGATTG 720  
FRI\_St-0 GCGAGCGACGTTGTTCTTTGATGAGGGAACGACCGTACGCTTGGCGACCTTCTCTGATTG 718  
FRI\_Bg-2 GCGAGCGACGTTGTTCTTTGATGAGGGAACGACCGTACGCTTGGCGACCTTCTCTGATTG 718  
FRI\_C24 GCGAGCGACGTTGTTCTTTGATGAGGGAACGACCGTACGCTTGGCGACCTTCTCTGATTG 718  
FRI\_Van-0 GCGAGCGACGTTGTTCTTTGATGAGGGAACGACCGTACGCTTGGCGACCTTCTCTGATTG 718  
FRI\_U11-2-3 GCGAGCGACGTTGTTCTTTGATGAGGGAACGACCGTACGCTTGGCGACCTTCTCTGATTG 718  
FRI\_Lip-0 GCGAGCGACGTTGTTCTTTGATGAGGGAACGACCGTACGCTTGGCGACCTTCTCTGATTG 718  
FRI\_NFA-8 GCGAGCGACGTTGTTCTTTGATGAGGGAACGACCGTACGCTTGGCGACCTTCTCTGATTG 720  
FRI\_Edi-0 GCGAGCGACGTTGTTCTTTGATGAGGGAACGACCGTACGCTTGGCGACCTTCTCTGATTG 720  
FRI\_Ren-1 GCGAGCGACGTTGTTCTTTGATGAGGGAACGACCGTACGCTTGGCGACCTTCTCTGATTG 720  
FRI\_Nok-3 GCGAGCGACGTTGTTCTTTGATGAGGGAACGACCGTACGCTTGGCGACCTTCTCTGATTG 720  
FRI\_Sha GCGAGCGACGTTGTTCTTTGATGAGGGAACGACCGTACGCTTGGCGACCTTCTCTGATTG 720  
FRI\_Wa-1 GCGAGCGACGTTGTTCTTTGATGAGGGAACGACCGTACGCTTGGCGACCTTCTCTGATTG 720

FRI\_Spr-1-6 GCGAGCGACGTTGTTCTTTGATGAGGGAACGACCGTACGCTTGGCGACCTTCTCTGATTG 720  
FRI\_Bil-7 GCGAGCGACGTTGTTCTTTGATGAGGGAACGACCGTACGCTTGGCGACCTTCTCTGATTG 720  
FRI\_Alc-0 GCGAGCGACGTTGTTCTTTGATGAGGGAACGACCGTACGCTTGGCGACCTTCTCTGATTG 720  
FRI\_Pu-2-23 GCGAGCGACGTTGTTCTTTGATGAGGGAACGACCGTACGCTTGGCGACCTTCTCTGATTG 720  
FRI\_NFA-10 GCGAGCGACGTTGTTCTTTGATGAGGGAACGACCGTACGCTTGGCGACCTTCTCTGATTG 719  
FRI\_Cvi-0 GCGAGCGACGTTGTTCTTTGATGAGGGAACGACCGTACGCTTGGCGACCTTCTCTGATTG 720  
FRI\_Zdr-6 GCGAGCGACGTTGTTCTTTGATGAGGGAACGACCGTACGCTTGGCGACCTTCTCTGATTG 720  
\*\*\*\*\*

FRI\_An-1 CGTAGAGTCGTTTTTCCTTATTGGGCTTACCTAGTACCGTCAGCCCAACAATGTTTTCAATTT 780  
FRI\_Pro-0 CGTAGAGTCGTTTTTCCTTATTGGGCTTACCTAGTACCGTCAGCCCAACAATGTTTTCAATTT 779  
FRI\_Bâ1-2 CGTAGAGTCGTTTTTCCTTATTGGGCTTACCTAGTACCGTCAGCCCAACAATGTTTTCAATTT 780  
FRI\_St-0 CGTAGAGTCGTTTTTCCTTATTGGGCTTACCTAGTACCGTCAGCCCAACAATGTTTTCAATTT 778  
FRI\_Bg-2 CGTAGAGTCGTTTTTCCTTATTGGGCTTACCTAGTACCGTCAGCCCAACAATGTTTTCAATTT 778  
FRI\_C24 CGTAGAGTCGTTTTTCCTTATTGGGCTTACCTAGTACCGTCAGCCCAACAATGTTTTCAATTT 778  
FRI\_Van-0 CGTAGAGTCGTTTTTCCTTATTGGGCTTACCTAGTACCGTCAGCCCAACAATGTTTTCAATTT 778  
FRI\_U11-2-3 CGTAGAGTCGTTTTTCCTTATTGGGCTTACCTAGTACCGTCAGCCCAACAATGTTTTCAATTT 778  
FRI\_Lip-0 CGTAGAGTCGTTTTTCCTTATTGGGCTTACCTAGTACCGTCAGCCCAACAATGTTTTCAATTT 778  
FRI\_NFA-8 CGTAGAGTCGTTTTTCCTTATTGGGCTTACCTAGTACCGTCAGCCCAACAATGTTTTCAATTT 780  
FRI\_Edi-0 CGTAGAGTCGTTTTTCCTTATTGGGCTTACCTAGTACCGTCAGCCCAACAATGTTTTCAATTT 780  
FRI\_Ren-1 CGTAGAGTCGTTTTTCCTTATTGGGCTTACCTAGTACCGTCAGCCCAACAATGTTTTCAATTT 780  
FRI\_Nok-3 CGTAGAGTCGTTTTTCCTTATTGGGCTTACCTAGTACCGTCAGCCCAACAATGTTTTCAATTT 780  
FRI\_Sha CGTAGAGTCGTTTTTCCTTATTGGGCTTACCTAGTACCGTCAGCCCAACAATGTTTTCAATTT 780  
FRI\_Wa-1 CGTAGAGTCGTTTTTCCTTATTGGGCTTACCTAGTACCGTCAGCCCAACAATGTTTTCAATTT 780  
FRI\_Spr-1-6 CGTAGAGTCGTTTTTCCTTATTGGGCTTACCTAGTACCGTCAGCCCAACAATGTTTTCAATTT 780  
FRI\_Bil-7 CGTAGAGTCGTTTTTCCTTATTGGGCTTACCTAGTACCGTCAGCCCAACAATGTTTTCAATTT 780  
FRI\_Alc-0 CGTAGAGTCGTTTTTCCTTATTGGGCTTACCTAGTACCGTCAGCCCAACAATGTTTTCAATTT 780  
FRI\_Pu-2-23 CGTAGAGTCGTTTTTCCTTATTGGGCTTACCTAGTACCGTCAGCCCAACAATGTTTTCAATTT 780  
FRI\_NFA-10 CGTAGAGTCGTTTTTCCTTATTGGGCTTACCTAGTACCGTCAGCCCAACAATGTTTTCAATTT 779  
FRI\_Cvi-0 CGTAGAGTCGTTTTTCCTTATTGGGCTTACCTAGTACCGTCAGCCCAACAATGTTTTCAATTT 780  
FRI\_Zdr-6 CGTAGAGTCGTTTTTCCTTATTGGGCTTACCTAGTACCGTCAGCCCAACAATGTTTTCAATTT 780  
\*\*\*\*\*

FRI\_An-1 CTTTCCCACCTAAAAGTAAAGTACTCACAAGTCAACAATTAACCAAGTACACAAGGAT 840  
FRI\_Pro-0 CTTTCCCACCTAAAAGTAAAGTACTCACAAGTCAACAATTAACCAAGTACACAAGGAT 839  
FRI\_Bâ1-2 CTTTCCCACCTAAAAGTAAAGTACTCACAAGTCAACAATTAACCAAGTACACAAGGAT 840  
FRI\_St-0 CTTTCCCACCTAAAAGTAAAGTACTCACAAGTCAACAATTAACCAAGTACACAAGGAT 829  
FRI\_Bg-2 CTTTCCCACCTAAAAGTAAAGTACTCACAAGTCAACAATTAACCAAGTACACAAGGAT 838  
FRI\_C24 CTTTCCCACCTAAAAGTAAAGTACTCACAAGTCAACAATTAACCAAGTACACAAGGAT 838  
FRI\_Van-0 CTTTCCCACCTAAAAGTAAAGTACTCACAAGTCAACAATTAACCAAGTACACAAGGAT 838  
FRI\_U11-2-3 CTTTCCCACCTAAAAGTAAAGTACTCACAAGTCAACAATTAACCAAGTACACAAGGAT 838  
FRI\_Lip-0 CTTTCCCACCTAAAAGTAAAGTACTCACAAGTCAACAATTAACCAAGTACACAAGGAT 838  
FRI\_NFA-8 CTTTCCCACCTAAAAGTAAAGTACTCACAAGTCAACAATTAACCAAGTACACAAGGAT 840  
FRI\_Edi-0 CTTTCCCACCTAAAAGTAAAGTACTCACAAGTCAACAATTAACCAAGTACACAAGGAT 840  
FRI\_Ren-1 CTTTCCCACCTAAAAGTAAAGTACTCACAAGTCAACAATTAACCAAGTACACAAGGAT 840  
FRI\_Nok-3 CTTTCCCACCTAAAAGTAAAGTACTCACAAGTCAACAATTAACCAAGTACACAAGGAT 840  
FRI\_Sha CTTTCCCACCTAAAAGTAAAGTACTCACAAGTCAACAATTAACCAAGTACACAAGGAT 840  
FRI\_Wa-1 CTTTCCCACCTAAAAGTAAAGTACTCACAAGTCAACAATTAACCAAGTACACAAGGAT 840  
FRI\_Spr-1-6 CTTTCCCACCTAAAAGTAAAGTACTCACAAGTCAACAATTAACCAAGTACACAAGGAT 840  
FRI\_Bil-7 CTTTCCCACCTAAAAGTAAAGTACTCACAAGTCAACAATTAACCAAGTACACAAGGAT 840  
FRI\_Alc-0 CTTTCCCACCTAAAAGTAAAGTACTCACAAGTCAACAATTAACCAAGTACACAAGGAT 840  
FRI\_Pu-2-23 CTTTCCCACCTAAAAGTAAAGTACTCACAAGTCAACAATTAACCAAGTACACAAGGAT 840  
FRI\_NFA-10 CTTTCCCACCTAAAAGTAAAGTACTCACAAGTCAACAATTAACCAAGTACACAAGGAT 839  
FRI\_Cvi-0 CTTTCCCACCTAAAAGTAAAGTACTCACAAGTCAACAATTAACCAAGTACACAAGGAT 840  
FRI\_Zdr-6 CTTTCCCACCTAAAAGTAAAGTACTCACAAGTCAACAATTAACCAAGTACACAAGGAT 840  
\*\*\*\*\*

FRI\_An-1 TTTATCATGGGATTATCGTGTTTGAAGACTAAAAGAGCACACCATCACCCCATTAGTG 900  
FRI\_Pro-0 TTTATCATGGGATTATCGTGTTTGAAGACTAAAAGAGCACACCATCACCCCATTAGTG 899  
FRI\_Bâ1-2 TTTATCATGGGATTATCGTGTTTGAAGACTAAAAGAGCACACCATCACCCCATTAGTG 900  
FRI\_St-0 ----- 829  
FRI\_Bg-2 TTTATCATGGGATTATCGTGTTTGAAGACTAAAAGAGCACACCATCACCCCATTAGTG 898  
FRI\_C24 TTTATCATGGGATTATCGTGTTTGAAGACTAAAAGAGCACACCATCACCCCATTAGTG 898  
FRI\_Van-0 TTTATCATGGGATTATCGTGTTTGAAGACTAAAAGAGCACACCATCACCCCATTAGTG 898  
FRI\_U11-2-3 TTTATCATGGGATTATCGTGTTTGAAGACTAAAAGAGCACACCATCACCCCATTAGTG 898  
FRI\_Lip-0 TTTATCATGGGATTATCGTGTTTGAAGACTAAAAGAGCACACCATCACCCCATTAGTG 898  
FRI\_NFA-8 TTTATCATGGGATTATCGTGTTTGAAGACTAAAAGAGCACACCATCACCCCATTAGTG 900  
FRI\_Edi-0 TTTATCATGGGATTATCGTGTTTGAAGACTAAAAGAGCACACCATCACCCCATTAGTG 900  
FRI\_Ren-1 TTTATCATGGGATTATCGTGTTTGAAGACTAAAAGAGCACACCATCACCCCATTAGTG 900  
FRI\_Nok-3 TTTATCATGGGATTATCGTGTTTGAAGACTAAAAGAGCACACCATCACCCCATTAGTG 900  
FRI\_Sha TTTATCATGGGATTATCGTGTTTGAAGACTAAAAGAGCACACCATCACCCCATTAGTG 900

FRI\_Wa-1 TTTATCATGGGATTATCGAGTTTGAAGACTAAAAAGAGCACACCATCACCCCATTAGTG 900  
FRI\_Spr-1-6 TTTATCATGGGATTATCGAGTTTGAAGACTAAAAAGAGCACACCATCACCCCATTAGTG 900  
FRI\_Bil-7 TTTATCATGGGATTATCGTGTTTGAAGACTAAAAAGAGCACACCATCACCCCATTAGTG 900  
FRI\_Alc-0 TTTATCATGGGATTATCGTGTTTGAAGACTAAAAAGAGCACACCATCACCCCATTAGTG 900  
FRI\_Pu-2-23 TTTATCATGGGATTATCGTGTTTGAAGACTAAAAAGAGCACACCATCACCCCATTAGTG 900  
FRI\_NFA-10 TTTATCATGGGATTATCGTGTTTGAAGACTAAAAAGAGCACACCATCACCCCATTAGTG 899  
FRI\_Cvi-0 TTTATCATGGGATTATCGTGTTTGAAGACTAAAAAGAGCACACCATCACCCCATTAGTG 900  
FRI\_Zdr-6 TTTATCATGGGATTATCGTGTTTGAAGACTAAAAAGAGCACACCATCACCCCATTAGTG 900

FRI\_An-1 CAGGTAGAGTAAGACAGTAACCTTTTGGGTTTCATATTACCGAGCAAGAACCCTTATTTGTG 960  
FRI\_Pro-0 CAGGTAGAGTAAGACAGTAACCTTTTGGGTTTCATATTACCGAGCAAGAACCCTTATTTGTG 959  
FRI\_Bål-2 CAGGTAGAGTAAGACAGTAACCTTTTGGGTTTCATATTACCGAGCAAGAACCCTTATTTGTG 960  
FRI\_St-0 CAGGTAGAGTAAGACAGTAACCTTTTGGGTTTCATATTACCGAGCAAGAACCCTTATTTGTG 889  
FRI\_Bg-2 CAGGTAGAGTAAGACAGTAACCTTTTGGGTTTCATATTACCGAGCAAGAACCCTTATTTGTG 958  
FRI\_C24 CAGGTAGAGTAAGACAGTAACCTTTTGGGTTTCATATTACCGAGCAAGAACCCTTATTTGTG 958  
FRI\_Van-0 CAGGTAGAGTAAGACAGTAACCTTTTGGGTTTCATATTACCGAGCAAGAACCCTTATTTGTG 958  
FRI\_U11-2-3 CAGGTAGAGTAAGACAGTAACCTTTTGGGTTTCATATTACCGAGCAAGAACCCTTATTTGTG 958  
FRI\_Lip-0 CAGGTAGAGTAAGACAGTAACCTTTTGGGTTTCATATTACCGAGCAAGAACCCTTATTTGTG 958  
FRI\_NFA-8 CAGGTAGAGTAAGACAGTAACCTTTTGGGTTTCATATTACCGAGCAAGAACCCTTATTTGTG 960  
FRI\_Edi-0 CAGGTAGAGTAAGACAGTAACCTTTTGGGTTTCATATTACCGAGCAAGAACCCTTATTTGTG 960  
FRI\_Ren-1 CAGGTAGAGTAAGACAGTAACCTTTTGGGTTTCATATTACCGAGCAAGAACCCTTATTTGTG 960  
FRI\_Nok-3 CAGGTAGAGTAAGACAGTAACCTTTTGGGTTTCATATTACCGAGCAAGAACCCTTATTTGTG 960  
FRI\_Sha CAGGTAGAGTAAGACAGTAACCTTTTGGGTTTCATATTACCGAGCAAGAACCCTTATTTGTG 960  
FRI\_Wa-1 CAGGTAGAGTAAGACAGTAACCTTTTGGGTTTCATATTACCGAGCAAGAACCCTTATTTGTG 960  
FRI\_Spr-1-6 CAGGTAGAGTAAGACAGTAACCTTTTGGGTTTCATATTACCGAGCAAGAACCCTTATTTGTG 960  
FRI\_Bil-7 CAGGTAGAGTAAGACAGTAACCTTTTGGGTTTCATATTACCGAGCAAGAACCCTTATTTGTG 960  
FRI\_Alc-0 CAGGTAGAGTAAGACAGTAACCTTTTGGGTTTCATATTACCGAGCAAGAACCCTTATTTGTG 960  
FRI\_Pu-2-23 CAGGTAGAGTAAGACAGTAACCTTTTGGGTTTCATATTACCGAGCAAGAACCCTTATTTGTG 960  
FRI\_NFA-10 CAGGTAGAGTAAGACAGTAACCTTTTGGGTTTCATATTACCGAGCAAGAACCCTTATTTGTG 959  
FRI\_Cvi-0 CAGGTAGAGTAAGACAGTAACCTTTTGGGTTTCATATTACCGAGCAAGAACCCTTATTTGTG 960  
FRI\_Zdr-6 CAGGTAGAGTAAGACAGTAACCTTTTGGGTTTCATATTACCGAGCAAGAACCCTTATTTGTG 960  
\*\*\*\*\*

FRI\_An-1 ATTAGACATGTTATAAACCCTGCTTTAGTGACTATTTAAAACAATATATTACATGTCGT 1020  
FRI\_Pro-0 ATTAGACATGTTATAAACCCTGCTTTAGTGACTATTTAAAACAATATATTACATGTCGT 1019  
FRI\_Bål-2 ATTAGACATGTTATAAACCCTGCTTTAGTGACTATTTAAAACAATATATTACATGTCGT 1020  
FRI\_St-0 ATTAGACATGTTATAAACCCTGCTTTAGTGACTATTTAAAACAATATATTACATGTCGT 949  
FRI\_Bg-2 ATTAGACATGTTATAAACCCTGCTTTAGTGACTATTTAAAACAATATATTACATGTCGT 1018  
FRI\_C24 ATTAGACATGTTATAAACCCTGCTTTAGTGACTATTTAAAACAATATATTACATGTCGT 1018  
FRI\_Van-0 ATTAGACATGTTATAAACCCTGCTTTAGTGACTATTTAAAACAATATATTACATGTCGT 1018  
FRI\_U11-2-3 ATTAGACATGTTATAAACCCTGCTTTAGTGACTATTTAAAACAATATATTACATGTCGT 1018  
FRI\_Lip-0 ATTAGACATGTTATAAACCCTGCTTTAGTGACTATTTAAAACAATATATTACATGTCGT 1018  
FRI\_NFA-8 ATTAGACATGTTATAAACCCTGCTTTAGTGACTATTTAAAACAATATATTACATGTCGT 1020  
FRI\_Edi-0 ATTAGACATGTTATAAACCCTGCTTTAGTGACTATTTAAAACAATATATTACATGTCGT 1020  
FRI\_Ren-1 ATTAGACATGTTATAAACCCTGCTTTAGTGACTATTTAAAACAATATATTACATGTCGT 1020  
FRI\_Nok-3 ATTAGACATGTTATAAACCCTGCTTTAGTGACTATTTAAAACAATATATTACATGTCGT 1020  
FRI\_Sha ATTAGACATGTTATAAACCCTGCTTTAGTGACTATTTAAAACAATATATTACATGTCGT 1020  
FRI\_Wa-1 ATTAGACATGTTATAAACCCTGCTTTAGTGACTATTTAAAACAATATATTACATGTCGT 1020  
FRI\_Spr-1-6 ATTAGACATGTTATAAACCCTGCTTTAGTGACTATTTAAAACAATATATTACATGTCGT 1020  
FRI\_Bil-7 ATTAGACATGTTATAAACCCTGCTTTAGTGACTATTTAAAACAATATATTACATGTCGT 1020  
FRI\_Alc-0 ATTAGACATGTTATAAACCCTGCTTTAGTGACTATTTAAAACAATATATTACATGTCGT 1020  
FRI\_Pu-2-23 ATTAGACATGTTATAAACCCTGCTTTAGTGACTATTTAAAACAATATATTACATGTCGT 1020  
FRI\_NFA-10 ATTAGACATGTTATAAACCCTGCTTTAGTGACTATTTAAAACAATATATTACATGTCGT 1019  
FRI\_Cvi-0 ATTAGACATGTTATAAACCCTGCTTTAGTGACTATTTAAAACAATATATTACATGTCGT 1020  
FRI\_Zdr-6 ATTAGACATGTTATAAACCCTGCTTTAGTGACTATTTAAAACAATATATTACATGTCGT 1020  
\*\*\*\*\*

FRI\_An-1 AATCATGCAACCTAECTATGTTTTTCATTAATCAAATACAAAGAATAAAGAGAAAAGTGCG 1080  
FRI\_Pro-0 AATCATGCAACCTAECTATGTTTTTCATTAATCAAATACAAAGAATAAAGAGAAAAGTGCG 1079  
FRI\_Bål-2 AATCATGCAACCTAECTATGTTTTTCATTAATCAAATACAAAGAATAAAGAGAAAAGTGCG 1080  
FRI\_St-0 AATCATGCAACCTAECTATGTTTTTCATTAATCAAATACAAAGAATAAAGAGAAAAGTGCG 1009  
FRI\_Bg-2 AATCATGCAACCTAECTATGTTTTTCATTAATCAAATACAAAGAATAAAGAGAAAAGTGCG 1078  
FRI\_C24 AATCATGCAACCTAECTATGTTTTTCATTAATCAAATACAAAGAATAAAGAGAAAAGTGCG 1078  
FRI\_Van-0 AATCATGCAACCTAECTATGTTTTTCATTAATCAAATACAAAGAATAAAGAGAAAAGTGCG 1078  
FRI\_U11-2-3 AATCATGCAACCTAECTATGTTTTTCATTAATCAAATACAAAGAATAAAGAGAAAAGTGCG 1078  
FRI\_Lip-0 AATCATGCAACCTAECTATGTTTTTCATTAATCAAATACAAAGAATAAAGAGAAAAGTGCG 1078  
FRI\_NFA-8 AATCATGCAACCTAECTATGTTTTTCATTAATCAAATACAAAGAATAAAGAGAAAAGTGCG 1080  
FRI\_Edi-0 AATCATGCAACCTAECTATGTTTTTCATTAATCAAATACAAAGAATAAAGAGAAAAGTGCG 1080  
FRI\_Ren-1 AATCATGCAACC----- 1032  
FRI\_Nok-3 AATCATGCAACCTAECTATGTTTTTCATTAATCAAATACAAAGAATAAAGAGAAAAGTGCG 1080

FRI\_Sha AATCATGCAACCTAACTATGTTTTTCATTAATCAAATACAAAGAATAAAGAGAAAAGTGCG 1080  
FRI\_Wa-1 AATCATGCAACCTAACTATGTTTTTCATTAATCAAATACAAAGAATAAAGAGAAAAGTGCG 1080  
FRI\_Spr-1-6 AATCATGCAACCTAACTATGTTTTTCATTAATCAAATACAAAGAATAAAGAGAAAAGTGCG 1080  
FRI\_Bil-7 AATCATGCAACCTAACTATGTTTTTCATTAATCAAATACAAAGAATAAAGAGAAAAGTGCG 1080  
FRI\_Alc-0 AATCATGCAACCTAACTATGTTTTTCATTAATCAAATACAAAGAATAAAGAGAAAAGTGCG 1080  
FRI\_Pu-2-23 AATCATGCAACCTAACTATGTTTTTCATTAATCAAATACAAAGAATAAAGAGAAAAGTGCG 1080  
FRI\_NFA-10 AATCATGCAACCTAACTATGTTTTTCATTAATCAAATACAAAGAATAAAGAGAAAAGTGCG 1079  
FRI\_Cvi-0 AATCATGCAACCTAACTATGTTTTTCATTAATCAAATACAAAGAATAAAGAGAAAAGTGCG 1080  
FRI\_Zdr-6 AATCATGCAACCTAACTATGTTTTTCATTAATCAAATACAAAGAATAAAGAGAAAAGTGCG 1080  
\*\*\*\*\*

FRI\_An-1 TAGATTCAATTATTTGGCATAGACTCAAAGAGTGTATATATATCTGACTTTTATTAAT 1140  
FRI\_Pro-0 TAGATTCAATTATTTGGCATAGACTCAAAGAGTGTATATATATCTGACTTTTATTAAT 1139  
FRI\_Bâ1-2 TAGATTCAATTATTTGGCATAGACTCAAAGAGTGTATATATATCTGACTTTTATTAAT 1140  
FRI\_St-0 TAGATTCAATTATTTGGCATAGACTCAAAGAGTGTATATATATCTGACTTTTATTAAT 1069  
FRI\_Bg-2 TAGATTCAATTATTTGGCATAGACTCAAAGAGTGTATATATATCTGACTTTTATTAAT 1138  
FRI\_C24 TAGATTCAATTATTTGGCATAGACTCAAAGAGTGTATATATATCTGACTTTTATTAAT 1138  
FRI\_Van-0 TAGATTCAATTATTTGGCATAGACTCAAAGAGTGTATATATATCTGACTTTTATTAAT 1138  
FRI\_U11-2-3 TAGATTCAATTATTTGGCATAGACTCAAAGAGTGTATATATATCTGACTTTTATTAAT 1138  
FRI\_Lip-0 TAGATTCAATTATTTGGCATAGACTCAAAGAGTGTATATATATCTGACTTTTATTAAT 1138  
FRI\_NFA-8 TAGATTCAATTATTTGGCATAGACTCAAAGAGTGTATATATATCTGACTTTTATTAAT 1140  
FRI\_Edi-0 TAGATTCAATTATTTGGCATAGACTCAAAGAGTGTATATATATCTGACTTTTATTAAT 1140  
FRI\_Ren-1 ----- 1032  
FRI\_Nok-3 TAGATTCAATTACTTTGGCATAGACTCAAAGAGTGTATATATATCTGACTTTTATTAAT 1140  
FRI\_Sha TAGATTCAATTATTTGGCATAGACTCAAAGAGTGTATATATATCTGACTTTTATTAAT 1140  
FRI\_Wa-1 TAGATTCAATTATTTGGCATAGACTCAAAGAGTGTATATATATCTGACTTTTATTAAT 1140  
FRI\_Spr-1-6 TAGATTCAATTATTTGGCATAGACTCAAAGAGTGTATATATATCTGACTTTTATTAAT 1140  
FRI\_Bil-7 TAGATTCAATTATTTGGCATAGACTCAAAGAGTGTATATATATCTGACTTTTATTAAT 1140  
FRI\_Alc-0 TAGATTCAATTATTTGGCATAGACTCAAAGAGTGTATATATATCTGACTTTTATTAAT 1140  
FRI\_Pu-2-23 TAGATTCAATTATTTGGCATAGACTCAAAGAGTGTATATATATCTGACTTTTATTAAT 1140  
FRI\_NFA-10 TAGATTCAATTATTTGGCATAGACTCAAAGAGTGTATATATATCTGACTTTTATTAAT 1139  
FRI\_Cvi-0 TAGATTCAATTATTTGGCATAGACTCAAAGAGTGTATATATATCTGACTTTTATTAAT 1140  
FRI\_Zdr-6 TAGATTCAATTATTTGGCATAGACTCAAAGAGTGTATATATATCTGACTTTTATTAAT 1140

FRI\_An-1 TATTAACACAAATACATATTTTCATAAGCAAAACTATAAAAAGCCCTAAACATATAACGA 1200  
FRI\_Pro-0 TATTAACACAAATACATATTTTCATAAGCAAAACTATAAAAAGCCCTAAACATATAATGA 1199  
FRI\_Bâ1-2 TATTAACACAAATACATATTTTCATAAGCAAAACTATAAAAAGCCCTAAACATATAATGA 1200  
FRI\_St-0 TATTAACACAAATACATATTTTCATAAGCAAAACTATAAAAAGCCCTAAACATATAACGA 1129  
FRI\_Bg-2 TATTAACACAAATACATATTTTCATAAGCAAAACTATAAAAAGCCCTAAACATATAACGA 1198  
FRI\_C24 TATTAACACAAATACATATTTTCATAAGCAAAACTATAAAAAGCCCTAAACATATAACGA 1198  
FRI\_Van-0 TATTAACACAAATACATATTTTCATAAGCAAAACTATAAAAAGCCCTAAACATATAATGA 1198  
FRI\_U11-2-3 TATTAACACAAATACATATTTTCATAAGCAAAACTATAAAAAGCCCTAAACATATAATGA 1198  
FRI\_Lip-0 TATTAACACAAATACATATTTTCATAAGCAAAACTATAAAAAGCCCTAAACATATAATGA 1198  
FRI\_NFA-8 TATTAACACAAATACATATTTTCATAAGCAAAACTATAAAAAGCCCTAAACATATAATGA 1200  
FRI\_Edi-0 TATTAACACAAATACATATTTTCATAAGCAAAACTATAAAAAGCCCTAAACATATAACGA 1200  
FRI\_Ren-1 ----- 1032  
FRI\_Nok-3 TATTAACACAAATACATATTTTCATAAGCAAAACTATAAAAAGCCCTAAACATATAATGA 1200  
FRI\_Sha TATTAACACAAATACATATTTTCATAAGCAAAACTATAAAAAGCCCTAAAGATATAACGA 1200  
FRI\_Wa-1 TATTAACACAAATACATATTTTCATAAGCAAAACTATAAAAAGCCCTAAAGATATAACGA 1200  
FRI\_Spr-1-6 TATTAACACAAATACATATTTTCATAAGCAAAACTATAAAAAGCCCTAAAGATATAACGA 1200  
FRI\_Bil-7 TATTAACACAAATACATATTTTCATAAGCAAAACTATAAAAAGCCCTAAACATATAATGA 1200  
FRI\_Alc-0 TATTAACACAAATACATATTTTCATAAGCAAAACTATAAAAAGCCCTAAACATATAACGA 1200  
FRI\_Pu-2-23 TATTAACACAAATACATATTTTCATAAGCAAAACTATAAAAAGCCCTAAACATATAATGA 1200  
FRI\_NFA-10 TATTAACACAAATACATATTTTCATAAGCAAAACTATAAAAAGCCCTAAACATATAATGA 1199  
FRI\_Cvi-0 TATTAACACAAATACATATTTTCATAAGCAAAACTATAAAAAGCCCTAAACATATAATGA 1200  
FRI\_Zdr-6 TATTAACACAAATACATATTTTCATAAGCAAAACTATAAAAAGCCCTAAACATATAATGA 1200

FRI\_An-1 TTACCTCAAAGGAAAAAGTCGTTTTCTCCTAATTTAAAAGATAGGTTACTTCTTAATTA-- 1258  
FRI\_Pro-0 TTACCTCAAAGGAAAAAGTCGTTTTCTCCTAATTTAAAAGATAGGTTACTTCTTAATTAAT 1259  
FRI\_Bâ1-2 TTACCTCAAAGGAAAAAGTCGTTTTCTCCTACTTTAAAAGATAGGTTACTTCTTAATTA-- 1258  
FRI\_St-0 TTACCTCAAAGGAAAAAGTCGTTTTCTCCTAATTTAAAAGATAGGTTACTTCTTAATTA-- 1187  
FRI\_Bg-2 TTACCTCAAAGGAAAAAGTCGTTTTCTCCTAATTTAAAAGATAGGTTACTTCTTAATTA-- 1256  
FRI\_C24 TTACCTCAAAGGAAAAAGTCGTTTTCTCCTAATTTAAAAGATAGGTTACTTCTTAATTA-- 1256  
FRI\_Van-0 TTACCTCAAAGGAAAAAGTCGTTTTCTCCTAATTTAAAAGATAGGTTACTTCTTAATTA-- 1256  
FRI\_U11-2-3 TTACCTCAAAGGAAAAAGTCGTTTTCTCCTAATTTAAAAGATAGGTTACTTCTTAATTAAT 1258  
FRI\_Lip-0 TTACCTCAAAGGAAAAAGTCGTTTTCTCCTAATTTAAAAGATAGGTTACTTCTTAATTAAT 1258  
FRI\_NFA-8 TTACCTCAAAGGAAAAAGTCGTTTTCTCCTAATTTAAAAGATAGGTTACTTCTTAATTA-- 1258  
FRI\_Edi-0 TTACCTCAAAGGAAAAAGTCGTTTTCTCCTAATTTAAAAGATAGGTTACTTCTTAATTA-- 1258  
FRI\_Ren-1 ----- 1032

|             |                                                            |      |
|-------------|------------------------------------------------------------|------|
| FRI_Nok-3   | TTACCTCAAAGGAAAAAGTCGTTTTCTCCTAATTAAGATAGGTTACTTCCTAATTA-- | 1258 |
| FRI_Sha     | TTACCTCAAAGGAAAAAGTCGTTTTCTCCTAATTAAGATAGGTTACTTCCTAATTA-- | 1258 |
| FRI_Wa-1    | TTACCTCAAAGGAAAAAGTCGTTTTCTCCTAATTAAGATAGGTTACTTCCTAATTA-- | 1258 |
| FRI_Spr-1-6 | TTACCTCAAAGGAAAAAGTCGTTTTCTCCTAATTAAGATAGGTTACTTCCTAATTA-- | 1258 |
| FRI_Bil-7   | TTACCTCAAAGGAAAAAGTCGTTTTCTCCTAATTAAGATAGGTTACTTCCTAATTA-- | 1258 |
| FRI_Alc-0   | TTACCTCAAAGGAAAAAGTCGTTTTCTCCTAATTAAGATAGGTTACTTCCTAATTA-- | 1258 |
| FRI_Pu-2-23 | TTACCTCAAAGGAAAAAGTCGTTTTCTCCTAATTAAGATAGGTTACTTCCTAATTAAT | 1260 |
| FRI_NFA-10  | TTACCTCAAAGGAAAAAGTCGTTTTCTCCTAATTAAGATAGGTTACTTCCTAATTAAT | 1259 |
| FRI_Cvi-0   | TTACCTCAAAGGAAAAAGTCGTTTTCTCCTAATTAAGATAGGTTACTTCCTAATTAAT | 1260 |
| FRI_Zdr-6   | TTACCTCAAAGGAAAAAGTCGTTTTCTCCTAATTAAGATAGGTTACTTCCTAATTAAT | 1260 |

|             |                                                               |      |
|-------------|---------------------------------------------------------------|------|
| FRI_An-1    | -ATATATAATTTATGTGAAC TTCACAATATACAGTCAATAAAAATTTGGTAATTTGACCG | 1317 |
| FRI_Pro-0   | AGTATATAATTTATGTGAAC TTCACAATATACAGTCAATAAAAATTTGGTAATTTGACCG | 1319 |
| FRI_Bal-2   | -ATATATAATTTATGTGAAC TTCACAATATACAGTCAATAAAAATTTGGTAATTTGACCG | 1317 |
| FRI_St-0    | -ATATATAATTTATGTGAAC TTCACAATATACAGTCAATAAAAATTTGGTAATTTGACCG | 1246 |
| FRI_Bg-2    | -ATATATAATTTATGTGAAC TTCACAATATACAGTCAATAAAAATTTGGTAATTTGACCG | 1315 |
| FRI_C24     | -ATATATAATTTATGTGAAC TTCACAATATACAGTCAATAAAAATTTGGTAATTTGACCG | 1315 |
| FRI_Van-0   | -ATATATAATTTATGTGAAC TTCACAATATACAGTCAATAAAAATTTGGTAATTTGACCG | 1315 |
| FRI_U11-2-3 | AGTATATAATTTATGTGAAC TTCACAATATACAGTCAATAAAAATTTGGTAATTTGACCG | 1318 |
| FRI_Lip-0   | AGTATATAATTTATGTGAAC TTCACAATATACAGTCAATAAAAATTTGGTAATTTGACCG | 1318 |
| FRI_NFA-8   | -ATATATAATTTATGTGAAC TTCACAATATACAGTCAATAAAAATTTGGTAATTTGACCG | 1317 |
| FRI_Edi-0   | -ATATATAATTTATGTGAAC TTCACAATATACAGTCAATAAAAATTTGGTAATTTGACCG | 1317 |
| FRI_Ren-1   | -----                                                         | 1032 |
| FRI_Nok-3   | -ATATATAATTTATGTGAAC TTCACAATATACAGTCAATAAAAATTTGGTAATTTGACCG | 1317 |
| FRI_Sha     | -ATATATAATTTATGTGAAC TTCACAATATACAGTCAATAAAAATTTGGTAATTTGACCG | 1317 |
| FRI_Wa-1    | -ATATATAATTTATGTGAAC TTCACAATATACAGTCAATAAAAATTTGGTAATTTGACCG | 1317 |
| FRI_Spr-1-6 | -ATATATAATTTATGTGAAC TTCACAATATACAGTCAATAAAAATTTGGTAATTTGACCG | 1317 |
| FRI_Bil-7   | -ATATATAATTTATGTGAAC TTCACAATATACAGTCAATAAAAATTTGGTAATTTGACCG | 1317 |
| FRI_Alc-0   | -ATATATAATTTATGTGAAC TTCACAATATACAGTCAATAAAAATTTGGTAATTTGACCG | 1317 |
| FRI_Pu-2-23 | AGTATATAATTTATGTGAAC TTCACAATATACAGTCAATAAAAATTTGGTAATTTGACCG | 1320 |
| FRI_NFA-10  | AGTATATAATTTATGTGAAC TTCACAATATACAGTCAATAAAAATTTGGTAATTTGACCG | 1319 |
| FRI_Cvi-0   | AGTATATAATTTATGTGAAC TTCACAATATACAGTCAATAAAAATTTGGTAATTTGACCG | 1320 |
| FRI_Zdr-6   | AGTATATAATTTATGTGAAC TTCACAATATACAGTCAATAAAAATTTGGTAATTTGACCG | 1320 |

|             |                                                             |      |
|-------------|-------------------------------------------------------------|------|
| FRI_An-1    | ATTTAAGGAGAGTGGAAATTAGGGCTTCTGCAATCTTTTTCTTCGCCGCAATCTCATGT | 1377 |
| FRI_Pro-0   | ATTTAAGGAGAGTGGAAATTAGGGCTTCTGCAATCTTTTTCTTCGCCGCAATCTCATGT | 1379 |
| FRI_Bal-2   | ATTTAAGGAGAGTGGAAATTAGGGCTTCTGCAATCTTTTTCTTCGCCGCAATCTCATGT | 1377 |
| FRI_St-0    | ATTTAAGGAGAGTGGAAATTAGGGCTTCTGCAATCTTTTTCTTCGCCGCAATCTCATGT | 1306 |
| FRI_Bg-2    | ATTTAAGGAGAGTGGAAATTAGGGCTTCTGCAATCTTTTTCTTCGCCGCAATCTCATGT | 1375 |
| FRI_C24     | ATTTAAGGAGAGTGGAAATTAGGGCTTCTGCAATCTTTTTCTTCGCCGCAATCTCATGT | 1375 |
| FRI_Van-0   | ATTTAAGGAGAGTGGAAATTAGGGCTTCTGCAATCTTTTTCTTCGCCGCAATCTCATGT | 1375 |
| FRI_U11-2-3 | ATTTAAGGAGAGTGGAAATTAGGGCTTCTGCAATCTTTTTCTTCGCCGCAATCTCATGT | 1378 |
| FRI_Lip-0   | ATTTAAGGAGAGTGGAAATTAGGGCTTCTGCAATCTTTTTCTTCGCCGCAATCTCATGT | 1378 |
| FRI_NFA-8   | ATTTAAGGAGAGTGGAAATTAGGGCTTCTGCAATCTTTTTCTTCGCCGCAATCTCATGT | 1377 |
| FRI_Edi-0   | ATTTAAGGAGAGTGGAAATTAGGGCTTCTGCAATCTTTTTCTTCGCCGCAATCTCATGT | 1377 |
| FRI_Ren-1   | -----                                                       | 1032 |
| FRI_Nok-3   | ATTTAAGGAGAGTGGAAATTAGGGCTTCTGCAATCTTTTTCTTCGCCGCAATCTCATGT | 1377 |
| FRI_Sha     | ATTTAAGGAGAGTGGAAATTAGGGCTTCTGCAATCTTTTTCTTCGCCGCAATCTCATGT | 1377 |
| FRI_Wa-1    | ATTTAAGGAGAGTGGAAATTAGGGCTTCTGCAATCTTTTTCTTCGCCGCAATCTCATGT | 1377 |
| FRI_Spr-1-6 | ATTTAAGGAGAGTGGAAATTAGGGCTTCTGCAATCTTTTTCTTCGCCGCAATCTCATGT | 1377 |
| FRI_Bil-7   | ATTTAAGGAGAGTGGAAATTAGGGCTTCTGCAATCTTTTTCTTCGCCGCAATCTCATGT | 1377 |
| FRI_Alc-0   | ATTTAAGGAGAGTGGAAATTAGGGCTTCTGCAATCTTTTTCTTCGCCGCAATCTCATGT | 1377 |
| FRI_Pu-2-23 | ATTTAAGGAGAGTGGAAATTAGGGCTTCTGCAATCTTTTTCTTCGCCGCAATCTCATGT | 1380 |
| FRI_NFA-10  | ATTTAAGGAGAGTGGAAATTAGGGCTTCTGCAATCTTTTTCTTCGCCGCAATCTCATGT | 1379 |
| FRI_Cvi-0   | ATTTAAGGAGAGTGGAAATTAGGGCTTCTGCAATCTTTTTCTTCGCCGCAATCTCATGT | 1380 |
| FRI_Zdr-6   | ATTTAAGGAGAGTGGAAATTAGGGCTTCTGCAATCTTTTTCTTCGCCGCAATCTCATGT | 1380 |

Start codon

|             |                                                          |      |
|-------------|----------------------------------------------------------|------|
| FRI_An-1    | CCAATTATCCACCGGCTGGCGGCAACCCACAACGACGGCGAATCCACTGCTGCAGC | 1437 |
| FRI_Pro-0   | CCAATTATCCACCGGCTGGCGGCAACCCACAACGACGGCGAATCCACTGCTGCAGC | 1439 |
| FRI_Bal-2   | CCAATTATCCACCGGCTGGCGGCAACCCACAACGACGGCGAATCCACTGCTGCAGC | 1437 |
| FRI_St-0    | CCAATTATCCACCGGCTGGCGGCAACCCACAACGACGGCGAATCCACTGCTGCAGC | 1366 |
| FRI_Bg-2    | CCAATTATCCACCGGCTGGCGGCAACCCACAACGACGGCGAATCCACTGCTGCAGC | 1435 |
| FRI_C24     | CCAATTATCCACCGGCTGGCGGCAACCCACAACGACGGCGAATCCACTGCTGCAGC | 1435 |
| FRI_Van-0   | CCAATTATCCACCGGCTGGCGGCAACCCACAACGACGGCGAATCCACTGCTGCAGC | 1435 |
| FRI_U11-2-3 | CCAATTATCCACCGGCTGGCGGCAACCCACAACGACGGCGAATCCACTGCTGCAGC | 1438 |
| FRI_Lip-0   | CCAATTATCCACCGGCTGGCGGCAACCCACAACGACGGCGAATCCACTGCTGCAGC | 1438 |
| FRI_NFA-8   | CCAATTATCCACCGGCTGGCGGCAACCCACAACGACGGCGAATCCACTGCTGCAGC | 1437 |



|             |                                                              |      |
|-------------|--------------------------------------------------------------|------|
| FRI_Edi-0   | CCAATTATCCACCGGCGGTGGCGGCGCAACCCACAACGACGGCGAATCCACTGCTGCAGC | 1437 |
| FRI_Ren-1   | -----TAACCCACAACGACGGCGAATCCACTGCTGCAGC                      | 1066 |
| FRI_Nok-3   | CCAATTATCCACCGGCGGTGGCGGCGCAACCCACAACGACGGCGAATCCACTGCTGCAGC | 1437 |
| FRI_Sha     | CCAATTATCCACCGGCGGTGGCGGCGCAACCCACAACGACGGCGAATCCACTGCTGCAGC | 1437 |
| FRI_Wa-1    | CCAATTATCCACCGGCGGTGGCGGCGCAACCCACAACGACGGCGAATCCACTGCTGCAGC | 1437 |
| FRI_Spr-1-6 | CCAATTATCCACCGGCGGTGGCGGCGCAACCCACAACGACGGCGAATCCACTGCTGCAGC | 1437 |
| FRI_Bil-7   | CCAATTATCCACCGGCGGTGGCGGCGCAACCCACAACGACGGCGAATCCACTGCTGCAGC | 1437 |
| FRI_Alc-0   | CCAATTATCCACCGGCGGTGGCGGCGCAACCCACAACGACGGCGAATCCACTGCTGCAGC | 1437 |
| FRI_Pu-2-23 | CCAATTATCCACCGGCGGTGGCGGCGCAACCCACAACGACGGCGAATCCACTGCTGCAGC | 1440 |
| FRI_NFA-10  | CCAATTATCCACCGGCGGTGGCGGCGCAACCCACAACGACGGCGAATCCACTGCTGCAGC | 1439 |
| FRI_Cvi-0   | CCAATTATCCACCGGCGGTGGCGGCGCAACCCACAACGACGGCGAATCCACTGCTGCAGC | 1440 |
| FRI_Zdr-6   | CCAATTATCCACCGGCGGTGGCGGCGCAACCCACAACGACGGCGAATCCACTGCTGCAGC | 1440 |

\*\* \*\*\*\*\*

|             |                                                                 |      |
|-------------|-----------------------------------------------------------------|------|
| FRI_An-1    | GACATCAATCTGAACAGCGACGAAGAGAATTACCGAAGATTGTCGAAACAGAGTCTACAA    | 1497 |
| FRI_Pro-0   | GACATCAATCTGAACAGCGACGAAGAGAATTACCGAAGATTGTCGAAACAGAGTCTACAA    | 1499 |
| FRI_Bål-2   | GACATCAATCTGAACAGCGACGAAGAGAATTACCGAAGATTGTCGAAACAGAGTCTACAA    | 1497 |
| FRI_St-0    | GACATCAATCTGAACAGCGACGAAGAGAATTACCGAAGATTGTCGAAACAGAGTCTACAA    | 1426 |
| FRI_Bg-2    | GACATCAATCTGAACAGCGACGAAGAGAATTACCGAAGATTGTCGAAACAGAGTCTACAA    | 1495 |
| FRI_C24     | GACATCAATCTGAACAGCGCGCAGGAAGAGAATTACCGAAGATTGTCGAAACAGAGTCTACAA | 1495 |
| FRI_Van-0   | GACATCAATCTGAACAGCGACGAAGAGAATTACCGAAGATTGTCGAAACAGAGTCTACAA    | 1495 |
| FRI_U11-2-3 | GACATCAATCTGAACAGCGACGAAGAGAATTACCGAAGATTGTCGAAACAGAGTCTACAA    | 1498 |
| FRI_Lip-0   | GACATCAATCTGAACAGCGACGAAGAGAATTACCGAAGATTGTCGAAACAGAGTCTACAA    | 1498 |
| FRI_NFA-8   | GACATCAATCTGAACAGCGACGAAGAGAATTACCGAAGATTGTCGAAACAGAGTCTACAA    | 1497 |
| FRI_Edi-0   | GACATCAATCTGAACAGCGACGAAGAGAATTACCGAAGATTGTCGAAACAGAGTCTACAA    | 1497 |
| FRI_Ren-1   | GACATCAATCTGAACAGCGACGAAGAGAATTACCGAAGATTGTCGAAACAGAGTCTACAA    | 1126 |
| FRI_Nok-3   | GACATCAATCTGAACAGCGACGAAGAGAATTACCGAAGATTGTCGAAACAGAGTCTACAA    | 1497 |
| FRI_Sha     | GACATCAATCTGAACAGCGACGAAGAGAATTACCGAAGATTGTCGAAACAGAGTCTACAA    | 1497 |
| FRI_Wa-1    | GACATCAATCTGAACAGCGACGAAGAGAATTACCGAAGATTGTCGAAACAGAGTCTACAA    | 1497 |
| FRI_Spr-1-6 | GACATCAATCTGAACAGCGACGAAGAGAATTACCGAAGATTGTCGAAACAGAGTCTACAA    | 1497 |
| FRI_Bil-7   | GACATCAATCTGAACAGCGACGAAGAGAATTACCGAAGATTGTCGAAACAGAGTCTACAA    | 1497 |
| FRI_Alc-0   | GACATCAATCTGAACAGCGACGAAGAGAATTACCGAAGATTGTCGAAACAGAGTCTACAA    | 1497 |
| FRI_Pu-2-23 | GACATCAATCTGAACAGCGACGAAGAGAATTACCGAAGATTGTCGAAACAGAGTCTACAA    | 1500 |
| FRI_NFA-10  | GACATCAATCTGAACAGCGACGAAGAGAATTACCGAAGATTGTCGAAACAGAGTCTACAA    | 1499 |
| FRI_Cvi-0   | GACATCAATCTGAACAGCGACGAAGAGAATTACCGAAGATTGTCGAAACAGAGTCTACAA    | 1500 |
| FRI_Zdr-6   | GACATCAATCTGAACAGCGACGAAGAGAATTACCGAAGATTGTCGAAACAGAGTCTACAA    | 1500 |

\*\*\*\*\*

|             |                                                              |      |
|-------------|--------------------------------------------------------------|------|
| FRI_An-1    | GTATGGACATTACGATCGGTCAATCTAAGCAGCCTCAATTTTTGAAATCCATAGACGAAT | 1557 |
| FRI_Pro-0   | GTATGGACATTACGATCGGTCAATCTAAGCAGCCTCAATTTTTGAAATCCATAGACGAAT | 1559 |
| FRI_Bål-2   | GTATGGACATTACGATCGGTCAATCTAAGCAGCCTCAATTTTTGAAATCCATAGACGAAT | 1557 |
| FRI_St-0    | GTATGGACATTACGATCGGTCAATCTAAGCAGCCTCAATTTTTGAAATCCATAGACGAAT | 1486 |
| FRI_Bg-2    | GTATGGACATTACGATCGGTCAATCTAAGCAGCCTCAATTTTTGAAATCCATAGACGAAT | 1555 |
| FRI_C24     | GTATGGACATTACGATCGGTCAATCTAAGCAGCCTCAATTTTTGAAATCCATAGACGAAT | 1555 |
| FRI_Van-0   | GTATGGACATTACGATCGGTCAATCTAAGCAGCCTCAATTTTTGAAATCCATAGACGAAT | 1555 |
| FRI_U11-2-3 | GTATGGACATTACGATCGGTCAATCTAAGCAGCCTCAATTTTTGAAATCCATAGACGAAT | 1558 |
| FRI_Lip-0   | GTATGGACATTACGATCGGTCAATCTAAGCAGCCTCAATTTTTGAAATCCATAGACGAAT | 1558 |
| FRI_NFA-8   | GTATGGACATTACGATCGGTCAATCTAAGCAGCCTCAATTTTTGAAATCCATAGACGAAT | 1557 |
| FRI_Edi-0   | GTATGGACATTACGATCGGTCAATCTAAGCAGCCTCAATTTTTGAAATCCATAGACGAAT | 1557 |
| FRI_Ren-1   | GTATGGACATTACGATCGGTCAATCTAAGCAGCCTCAATTTTTGAAATCCATAGACGAAT | 1186 |
| FRI_Nok-3   | GTATGGACATTACGATCGGTCAATCTAAGCAGCCTCAATTTTTGAAATCCATAGACGAAT | 1557 |
| FRI_Sha     | GTATGGACATTACGATCGGTCAATCTAAGCAGCCTCAATTTTTGAAATCCATAGACGAAT | 1557 |
| FRI_Wa-1    | GTATGGACATTACGATCGGTCAATCTAAGCAGCCTCAATTTTTGAAATCCATAGACGAAT | 1557 |
| FRI_Spr-1-6 | GTATGGACATTACGATCGGTCAATCTAAGCAGCCTCAATTTTTGAAATCCATAGACGAAT | 1557 |
| FRI_Bil-7   | GTATGGACATTACGATCGGTCAATCTAAGCAGCCTCAATTTTTGAAATCCATAGACGAAT | 1557 |
| FRI_Alc-0   | GTATGGACATTACGATCGGTCAATCTAAGCAGCCTCAATTTTTGAAATCCATAGACGAAT | 1557 |
| FRI_Pu-2-23 | GTATGGACATTACGATCGGTCAATCTAAGCAGCCTCAATTTTTGAAATCCATAGACGAAT | 1560 |
| FRI_NFA-10  | GTATGGACATTACGATCGGTCAATCTAAGCAGCCTCAATTTTTGAAATCCATAGACGAAT | 1559 |
| FRI_Cvi-0   | GTATGGACATTACGATCGGTCAATCTAAGCAGCCTCAATTTTTGAAATCCATAGACGAAT | 1560 |
| FRI_Zdr-6   | GTATGGACATTACGATCGGTCAATCTAAGCAGCCTCAATTTTTGAAATCCATAGACGAAT | 1560 |

\*\*\*\*\*

**Start codon in Ren-1**

|             |                                                              |      |
|-------------|--------------------------------------------------------------|------|
| FRI_An-1    | TAGCTGCGTTTTTCAGTTGCAGTGGAACATTCAAACGCCAATTCGATGATCTTCAGAAGC | 1617 |
| FRI_Pro-0   | TAGCTGCGTTTTTCAGTTGCAGTGGAACATTCAAATGCCAATTCGATGATCTTCAGAAGC | 1619 |
| FRI_Bål-2   | TAGCTGCGTTTTTCAGTTGCAGTGGAACATTCAAACGCCAATTCGATGATCTTCAGAAGC | 1617 |
| FRI_St-0    | TAGCTGCGTTTTTCAGTTGCAGTGGAACATTCAAACGCCAATTCGATGATCTTCAGAAGC | 1546 |
| FRI_Bg-2    | TAGCTGCGTTTTTCAGTTGCAGTGGAACATTCAAACGCCAATTCGATGATCTTCAGAAGC | 1615 |
| FRI_C24     | TAGCTGCGTTTTTCAGTTGCAGTGGAACATTCAAACGCCAATTCGATGATCTTCAGAAGC | 1615 |
| FRI_Van-0   | TAGCTGCGTTTTTCAGTTGCAGTGGAACATTCAAACGCCAATTCGATGATCTTCAGAAGC | 1615 |
| FRI_U11-2-3 | TAGCTGCGTTTTTCAGTTGCAGTGGAACATTCAAATGCCAATTCGATGATCTTCAGAAGC | 1618 |

FRI\_Lip-0 TAGCTGCGTTTTTCAGTTGCAGTGGAAACATTCAAACGCCAATTCGATGATCTTCAGAAGC 1618  
FRI\_NFA-8 TAGCTGCGTTTTTCAGTTGCAGTGGAAACATTCAAACGCCAATTCGATGATCTTCAGAAGC 1617  
FRI\_Edi-0 TAGCTGCGTTTTTCAGTTGCAGTGGAAACATTCAAACGCCAATTCGATGATCTTCAGAAGC 1617  
FRI\_Ren-1 TAGCTGCGTTTTTCAGTTGCAGTGGAAACATTCAAACGCCAATTCGATGATCTTCAGAAGC 1246  
FRI\_Nok-3 TAGCTGCGTTTTTCAGTTGCAGTGGAAACATTCAAACGCCAATTCGATGATCTTCAGAAGC 1617  
FRI\_Sha TAGCTGCGTTTTTCAGTTGCAGTGGAAACATTCAAACGCCAATTCGATGATCTTCAGAAGC 1617  
FRI\_Wa-1 TAGCTGCGTTTTTCAGTTGCAGTGGAAACATTCAAATGCCAATTCGATGATCTTCAGAAGC 1617  
FRI\_Spr-1-6 TAGCTGCGTTTTTCAGTTGCAGTGGAAACATTCAAATGCCAATTCGATGATCTTCAGAAGC 1617  
FRI\_Bil-7 TAGCTGCGTTTTTCAGTTGCAGTGGAAACATTCAAACGCCAATTCGATGATCTTCAGAAGC 1617  
FRI\_Alc-0 TAGCTGCGTTTTTCAGTTGCAGTGGAAATATTCAAACGCCAATTCGATGATCTTCAGAAGC 1617  
FRI\_Pu-2-23 TAGCTGCGTTTTTCAGTTGCAGTGGAAACATTCAAACGCCAATTCGATGATCTTCAGAAGC 1620  
FRI\_NFA-10 TAGCTGCGTTTTTCAGTTGCAGTGGAAACATTCAAATGCCAATTCGATGATCTTCAGAAGC 1619  
FRI\_Cvi-0 TAGCTGCGTTTTTCAGTTGCAGTGGAAACATTCAAATGCCAATTCGATGATCTTCAGAAGC 1620  
FRI\_Zdr-6 TAGCTGCGTTTTTCAGTTGCAGTGGAAACATTCAAATGCCAATTCGATGATCTTCAGAAGC 1620  
\*\*\*\*\*

FRI\_An-1 ACATCGAGTCAATCGAAAACGCAATTGATTCCAAACCTCGAGAGTAACGGCGTTGTCTCCTCG 1677  
FRI\_Pro-0 ACATCGAGTCAATCGAAAACGCAATTGATTCCAAACCTCGAGAGTAACGGCGTTGTCTCCTCG 1679  
FRI\_Bâ1-2 ACATCGAGTCAATCGAAAACGCAATTGATTCCAAACCTCGAGAGTAACGGCGTTGTCTCCTCG 1677  
FRI\_St-0 ACATCGAGTCAATCGAAAACGCAATTGATTCCAAACCTCGAGAGTAACGGCGTTGTCTCCTCG 1606  
FRI\_Bg-2 ACATCGAGTCAATCGAAAACGCAATTGATTCCAAACCTCGAGAGTAACGGCGTTGTCTCCTCG 1675  
FRI\_C24 ACATCGAGTCAATCGAAAACGCAATTGATTCCAAACCTCGAGAGTAACGGCGTTGTCTCCTCG 1675  
FRI\_Van-0 ACATCGAGTCAATCGAAAACGCAATTGATTCCAAACCTCGAGAGTAACGGCGTTGTCTCCTCG 1675  
FRI\_U11-2-3 ACATCGAGTCAATCGAAAACGCAATTGATTCCAAACCTCGAGAGTAACGGCGTTGTCTCCTCG 1678  
FRI\_Lip-0 ACATCGAGTCAATCGAAAACGCAATTGATTCCAAACCTCGAGAGTAACGGCGTTGTCTCCTCG 1678  
FRI\_NFA-8 ACATCGAGTCAATCGAAAACGCAATTGATTCCAAACCTCGAGAGTAACGGCGTTGTCTCCTCG 1677  
FRI\_Edi-0 ACATCGAGTCAATCGAAAACGCAATTGATTCCAAACCTCGAGAGTAACGGCGTTGTCTCCTCG 1677  
FRI\_Ren-1 ACATCGAGTCAATCGAAAACGCAATTGATTCCAAACCTCGAGAGTAACGGCGTTGTCTCCTCG 1306  
FRI\_Nok-3 ACATCGAGTCAATCGAAAACGCAATTGATTCCAAACCTCGAGAGTAACGGCGTTGTCTCCTCG 1677  
FRI\_Sha ACATCGAGTCAATCGAAAACGCAATTGATTCCAAACCTCGAGAGTAACGGCGTTGTCTCCTCG 1677  
FRI\_Wa-1 ACATCGAGTCAATCGAAAACGCAATTGATTCCAAACCTCGAGAGTAACGGCGTTGTCTCCTCG 1677  
FRI\_Spr-1-6 ACATCGAGTCAATCGAAAACGCAATTGATTCCAAACCTCGAGAGTAACGGCGTTGTCTCCTCG 1677  
FRI\_Bil-7 ACATCGAGTCAATCGAAAACGCAATTGATTCCAAACCTCGAGAGTAACGGCGTTGTCTCCTCG 1677  
FRI\_Alc-0 ACATCGAGTCAATCGAAAACGCAATTGATTCCAAACCTCGAGAGTAACGGCGTTGTCTCCTCG 1677  
FRI\_Pu-2-23 ACATCGAGTCAATCGAAAACGCAATTGATTCCAAACCTCGAGAGTAACGGCGTTGTCTCCTCG 1680  
FRI\_NFA-10 ACATCGAGTCAATCGAAAACGCAATTGATTCCAAACCTCGAGAGTAACGGCGTTGTCTCCTCG 1679  
FRI\_Cvi-0 ACATCGAGTCAATCGAAAACGCAATTGATTCCAAACCTCGAGAGTAACGGCGTTGTCTCCTCG 1680  
FRI\_Zdr-6 ACATCGAGTCAATCGAAAACGCAATTGATTCCAAACCTCGAGAGTAACGGCGTTGTCTCCTCG 1680  
\*\*\*\*\*

FRI\_An-1 CCGCGCGGAACAATAATTTCCATCAGCCGATGTTATCGCCTCCGCGGAACAATGTATCTG 1737  
FRI\_Pro-0 CCGCGCGGAACAATAATTTCCATCAGCCGATGTTATCGCCTCCGCGGAACAATGTATCTG 1739  
FRI\_Bâ1-2 CCGCGCGGAACAATAATTTCCATCAGCCGATGTTATCGCCTCCGCGGAACAATGTATCTG 1737  
FRI\_St-0 CCGCGCGGAACAATAATTTCCATCAGCCGATGTTATCGCCTCCGCGGAACAATGTATCTG 1666  
FRI\_Bg-2 CCGCGCGGAACAATAATTTCCATCAGCCGATGTTATCGCCTCCGCGGAACAATGTATCTG 1735  
FRI\_C24 CCGCGCGGAACAATAATTTCCATCAGCCGATGTTATCGCCTCCGCGGAACAATGTATCTG 1735  
FRI\_Van-0 CCGCGCGGAACAATAATTTCCATCAGCCGATGTTATCGCCTCCGCGGAACAATGTATCTG 1735  
FRI\_U11-2-3 CCGCGCGGAACAATAATTTCCATCAGCCGATGTTATCGCCTCCGCGGAACAATGTATCTG 1738  
FRI\_Lip-0 CCGCGCGGAACAATAATTTCCATCAGCCGATGTTATCGCCTCCGCGGAACAATGTATCTG 1738  
FRI\_NFA-8 CCGCGCGGAACAATAATTTCCATCAGCCGATGTTATCGCCTCCGCGGAACAATGTATCTG 1737  
FRI\_Edi-0 CCGCGCGGAACAATAATTTCCATCAGCCGATGTTATCGCCTCCGCGGAACAATGTATCTG 1737  
FRI\_Ren-1 CCGCGCGGAACAATAATTTCCATCAGCCGATGTTATCGCCTCCGCGGAACAATGTATCTG 1366  
FRI\_Nok-3 CCGCGCGGAACAATAATTTCCATCAGCCGATGTTATCGCCTCCGCGGAACAATGTATCTG 1737  
FRI\_Sha CCGCGCGGAACAATAATTTCCATCAGCCGATGTTATCGCCTCCGCGGAACAATGTATCTG 1737  
FRI\_Wa-1 CCGCGCGGAACAATAATTTCCATCAGCCGATGTTATCGCCTCCGCGGAACAATGTATCTG 1737  
FRI\_Spr-1-6 CCGCGCGGAACAATAATTTCCATCAGCCGATGTTATCGCCTCCGCGGAACAATGTATCTG 1737  
FRI\_Bil-7 CCGCGCGGAACAATAATTTCCATCAGCCGATGTTATCGCCTCCGCGGAACAATGTATCTG 1737  
FRI\_Alc-0 CCGCGCGGAACAATAATTTCCATCAGCCGATGTTATCGCCTCCGCGGAACAATGTATCTG 1737  
FRI\_Pu-2-23 CCGCGCGGAACAATAATTTCCATCAGCCGATGTTATCGCCTCCGCGGAACAATGTATCTG 1740  
FRI\_NFA-10 CCGCGCGGAACAATAATTTCCATCAGCCGATGTTATCGCCTCCGCGGAACAATGTATCTG 1739  
FRI\_Cvi-0 CCGCGCGGAACAATAATTTCCATCAGCCGATGTTATCGCCTCCGCGGAACAATGTATCTG 1740  
FRI\_Zdr-6 CCGCGCGGAACAATAATTTCCATCAGCCGATGTTATCGCCTCCGCGGAACAATGTATCTG 1740  
\*\*\*\*\*

FRI\_An-1 TAGAAACCACCGTCACTGTGAGCCAACCGTCTCAGGAGATTGTACCGGAGACGTGGAATA 1797  
FRI\_Pro-0 TAGAAACCACCGTCACTGTGAGCCAACCGTCTCAGGAGATTGTACCGGAGACGTGGAATA 1799  
FRI\_Bâ1-2 TAGAAACCACCGTCACTGTGAGCCAACCGTCTCAGGAGATTGTACCGGAGACGTGGAATA 1797  
FRI\_St-0 TAGAAACCACCGTCACTGTGAGCCAACCGTCTCAGGAGATTGTACCGGAGACGTGGAATA 1726  
FRI\_Bg-2 TAGAAACCACCGTCACTGTGAGCCAACCGTCTCAGGAGATTGTACCGGAGACGTGGAATA 1795  
FRI\_C24 TAGAAACCACCGTCACTGTGAGCCAACCGTCTCAGGAGATTGTACCGGAGACGTGGAATA 1795  
FRI\_Van-0 TAGAAACCACCGTCACTGTGAGCCAACCGTCTCAGGAGATTGTACCGGAGACGTGGAATA 1795

|             |                                                              |      |
|-------------|--------------------------------------------------------------|------|
| FRI_U11-2-3 | TAGAAACCACCGTCACTGTGAGCCAACCGTCTCAGGAGATTGTACCGGAGACGTCGAATA | 1798 |
| FRI_Lip-0   | TAGAAACCACCGTCACTGTGAGCCAACCGTCTCAGGAGATTGTACCGGAGACGTCGAATA | 1798 |
| FRI_NFA-8   | TAGAAACCACCGTCACTGTGAGCCAACCGTCTCAGGAGATTGTACCGGAGACGTCGAATA | 1797 |
| FRI_Edi-0   | TAGAAACCACCGTCACTGTGAGCCAACCGTCTCAGGAGATTGTACCGGAGACGTCGAATA | 1797 |
| FRI_Ren-1   | TAGAAACCACCGTCACTGTGAGCCAACCGTCTCAGGAGATTGTACCGGAGACGTCGAATA | 1426 |
| FRI_Nok-3   | TAGAAACCACCGTCACTGTGAGCCAACCGTCTCAGGAGATTGTACCGGAGACGTCGAATA | 1797 |
| FRI_Sha     | TAGAAACCACCGTCACTGTGAGCCAACCGTCTCAGGAGATTGTACCGGAGACGTCGAATA | 1797 |
| FRI_Wa-1    | TAGAAACCACCGTCACTGTGAGCCAACCGTCTCAGGAGATTGTACCGGAGACGTCGAATA | 1797 |
| FRI_Spr-1-6 | TAGAAACCACCGTCACTGTGAGCCAACCGTCTCAGGAGATTGTACCGGAGACGTCGAATA | 1797 |
| FRI_Bil-7   | TAGAAACCACCGTCACTGTGAGCCAACCGTCTCAGGAGATTGTACCGGAGACGTCGAATA | 1797 |
| FRI_Alc-0   | TAGAAACCACCGTCACTGTGAGCCAACCGTCTCAGGAGATTGTACCGGAGACGTCGAATA | 1797 |
| FRI_Pu-2-23 | TAGAAACCACCGTCACTGTGAGCCAACCGTCTCAGGAGATTGTACCGGAGACGTCGAATA | 1800 |
| FRI_NFA-10  | TAGAAACCACCGTCACTGTGAGCCAACCGTCTCAGGAGATTGTACCGGAGACGTCGAATA | 1799 |
| FRI_Cvi-0   | TAGAAACCACCGTCACTGTGAGCCAACCGTCTCAGGAGATTGTACCGGAGACGTCGAATA | 1800 |
| FRI_Zdr-6   | TAGAAACCACCGTCACTGTGAGCCAACCGTCTCAGGAGATTGTACCGGAGACGTCGAATA | 1800 |

\*\*\*\*\*

|             |                                                               |      |
|-------------|---------------------------------------------------------------|------|
| FRI_An-1    | AACCGGAGGGGGACGTATGTGTGAGTTGATGTGTAGCAAAGGTCGCGTAAATACATAT    | 1857 |
| FRI_Pro-0   | AACCGGAGGGGGACGTATGTGTGAGTTGATGTGTAGCAAAGGTCGCGTAAATACATAT    | 1859 |
| FRI_Bâ1-2   | AACCGGAGGGGGACGTATGTGTGAGTTGATGTGTAGCAAAGGTCGCGTAAATACATAT    | 1857 |
| FRI_St-0    | AACCGGAGGGGGAACGTATGTGTGAGTTGATGTGTAGCAAAGGTCGCGTAAATACATAT   | 1786 |
| FRI_Bg-2    | AACCGGAGGGGGAACGTATATGTGTGAGTTGATGTGTAGCAAAGGTCGCGTAAATACATAT | 1855 |
| FRI_C24     | AACCGGAGGGGGAACGTATGTGTGAGTTGATGTGTAGCAAAGGTCGCGTAAATACATAT   | 1855 |
| FRI_Van-0   | AACCGGAGGGGGACGTATGTGTGAGTTGATGTGTAGCAAAGGTCGCGTAAATACATAT    | 1855 |
| FRI_U11-2-3 | AACCGGAGGGGGACGTATGTGTGAGTTGATGTGTAGCAAAGGTCGCGTAAATACATAT    | 1858 |
| FRI_Lip-0   | AACCGGAGGGGGACGTATGTGTGAGTTGATGTGTAGCAAAGGTCGCGTAAATACATAT    | 1858 |
| FRI_NFA-8   | AACCGGAGGGGGAACGTATGTGTGAGTTGATGTGTAGCAAAGGTCGCGTAAATACATAT   | 1857 |
| FRI_Edi-0   | AACCGGAGGGGGAACGTATATGTGTGAGTTGATGTGTAGCAAAGGTCGCGTAAATACATAT | 1857 |
| FRI_Ren-1   | AACCGGAGGGGGAACGTATGTGTGAGTTGATGTGTAGCAAAGGTCGCGTAAATACATAT   | 1486 |
| FRI_Nok-3   | AACCGGAGGGGGAACGTATGTGTGAGTTGATGTGTAGCAAAGGTCGCGTAAATACATAT   | 1857 |
| FRI_Sha     | AACCGGAGGGGGACGTATGTGTGAGTTGATGTGTAGCAAAGGTCGCGTAAATACATAT    | 1857 |
| FRI_Wa-1    | AACCGGAGGGGGACGTATGTGTGAGTTGATGTGTAGCAAAGGTCGCGTAAATACATAT    | 1857 |
| FRI_Spr-1-6 | AACCGGAGGGGGACGTATGTGTGAGTTGATGTGTAGCAAAGGTCGCGTAAATACATAT    | 1857 |
| FRI_Bil-7   | AACCGGAGGGGGACGTATGTGTGAGTTGATGTGTAGCAAAGGTCGCGTAAATACATAT    | 1857 |
| FRI_Alc-0   | AACCGGAGGGGGACGTATGTGTGAGTTGATGTGTAGCAAAGGTCGCGTAAATACATAT    | 1857 |
| FRI_Pu-2-23 | AACCGGAGGGGGACGTATGTGTGAGTTGATGTGTAGCAAAGGTCGCGTAAATACATAT    | 1860 |
| FRI_NFA-10  | AACCGGAGGGGGACGTATGTGTGAGTTGATGTGTAGCAAAGGTCGCGTAAATACATAT    | 1859 |
| FRI_Cvi-0   | AACCGGAGGGGGACGTATGTGTGAGTTGATGTGTAGCAAAGGTCGCGTAAATACATAT    | 1860 |
| FRI_Zdr-6   | AACCGGAGGGGGACGTATGTGTGAGTTGATGTGTAGCAAAGGTCGCGTAAATACATAT    | 1860 |

\*\*\*\*\*

|             |                                                              |      |
|-------------|--------------------------------------------------------------|------|
| FRI_An-1    | ACGCGAATATCTCTGATCAAGCTAAGTTAATGGAAGAGATTCCTTCAGCTTTGAAATTGG | 1917 |
| FRI_Pro-0   | ACGCGAATATCTCTGAACAAGCTAAGTTAATGGAAGAGATTCCTTCAGCTTTGAAATTGG | 1919 |
| FRI_Bâ1-2   | ACGCGAATATCTCTGATCAAGCTAAGTTAATGGAAGAGATTCCTTCAGCTTTGAAATTGG | 1917 |
| FRI_St-0    | ACGCGAATATCTCTGATCAAGCTAAGTTAATGGAAGAGATTCCTTCAGCTTTGAAATTGG | 1846 |
| FRI_Bg-2    | ACGCGAATATCTCTGATCAAGCTAAGTTAATGGAAGAGATTCCTTCAGCTTTGAAATTGG | 1915 |
| FRI_C24     | ACGCGAATATCTCTGATCAAGCTAAGTTAATGGAAGAGATTCCTTCAGCTTTGAAATTGG | 1915 |
| FRI_Van-0   | ACGCGAATATCTCTGATCAAGCTAAGTTAATGGAAGAGATTCCTTCAGCTTTGAAATTGG | 1915 |
| FRI_U11-2-3 | ACGCGAATATCTCTGAACAAGCTAAGTTAATGGAAGAGATTCCTTCAGCTTTGAAATTGG | 1918 |
| FRI_Lip-0   | ACGCGAATATCTCTGAACAAGCTAAGTTAATGGAAGAGATTCCTTCAGCTTTGAAATTGG | 1918 |
| FRI_NFA-8   | ACGCGAATATCTCTGATCAAGCTAAGTTAATGGAAGAGATTCCTTCAGCTTTGAAATTGG | 1917 |
| FRI_Edi-0   | ACGCGAATATCTCTGATCAAGCTAAGTTAATGGAAGAGATTCCTTCAGCTTTGAAATTGG | 1917 |
| FRI_Ren-1   | ACGCGAATATCTCTGATCAAGCTAAGTTAATGGAAGAGATTCCTTCAGCTTTGAAATTGG | 1546 |
| FRI_Nok-3   | ACGCGAATATCTCTGATCAAGCTAAGTTAATGGAAGAGATTCCTTCAGCTTTGAAATTGG | 1917 |
| FRI_Sha     | ACGCGAATATCTCTGATCAAGCTAAGTTAATGGAAGAGATTCCTTCAGCTTTGAAATTGG | 1917 |
| FRI_Wa-1    | ACGCGAATATCTCTGAACAAGCTAAGTTAATGGAAGAGATTCCTTCAGCTTTGAAATTGG | 1917 |
| FRI_Spr-1-6 | ACGCGAATATCTCTGAACAAGCTAAGTTAATGGAAGAGATTCCTTCAGCTTTGAAATTGG | 1917 |
| FRI_Bil-7   | ACGCGAATATCTCTGATCAAGCTAAGTTAATGGAAGAGATTCCTTCAGCTTTGAAATTGG | 1917 |
| FRI_Alc-0   | AGTCGAATATCTCTGATCAAGCTAAGTTAATGGAAGAGATTCCTTCAGCTTTGAAATTGG | 1917 |
| FRI_Pu-2-23 | ACGCGAATATCTCTGATCAAGCTAAGTTAATGGAAGAGATTCCTTCAGCTTTGAAATTGG | 1920 |
| FRI_NFA-10  | ACGCGAATATCTCTGAACAAGCTAAGTTAATGGAAGAGATTCCTTCAGCTTTGAAATTGG | 1919 |
| FRI_Cvi-0   | ACGCGAATATCTCTGAACAAGCTAAGTTAATGGAAGAGATTCCTTCAGCTTTGAAATTGG | 1920 |
| FRI_Zdr-6   | ACGCGAATATCTCTGAACAAGCTAAGTTAATGGAAGAGATTCCTTCAGCTTTGAAATTGG | 1920 |

\* \*\*\*\*\*

|           |                                                             |      |
|-----------|-------------------------------------------------------------|------|
| FRI_An-1  | CCAAGGAGCCAGCGAAGTTTGTATTGGATTGTATTGGCAAGTTTACTTACAAGGGCGTA | 1977 |
| FRI_Pro-0 | CCAAGGAGCCAGCGAAGTTTGTATTGGATTGTATTGGCAAGTTTACTTACAAGGGCGTA | 1979 |
| FRI_Bâ1-2 | CCAAGGAGCCAGCGAAGTTTGTATTGGATTGTATTGGCAAGTTTACTTACAAGGGCGTA | 1977 |
| FRI_St-0  | CCAAGGAGCCAGCGAAGTTTGTATTGGATTGTATTGGCAAGTTTACTTACAAGGGCGTA | 1906 |
| FRI_Bg-2  | CCAAGGAGCCAGCGAAGTTTGTATTGGATTGTATTGGCAAGTTTACTTACAAGGGCGTA | 1975 |
| FRI_C24   | CCAAGGAGCCAGCGAAGTTTGTATTGGATTGTATTGGCAAGTTTACTTACAAGGGCGTA | 1975 |

|             |                                                              |      |
|-------------|--------------------------------------------------------------|------|
| FRI_Van-0   | CCAAGGAGCCAGCGAAGTTTGTATTGGATTGTATTGGCAAGTTTTACTTACAAGGGCGTA | 1975 |
| FRI_Ull-2-3 | CCAAGGAGCCAGCGAAGTTTGTATTGGATTGTATTGGCAAGTTTTACTTACAAGGGCGTA | 1978 |
| FRI_Lip-0   | CCAAGGAGCCAGCGAAGTTTGTATTGGATTGTATTGGCAAGTTTTACTTACAAGGGCGTA | 1978 |
| FRI_NFA-8   | CCAAGGAGCCAGCGAAGTTTGTATTGGATTGTATTGGCAAGTTTTACTTACAAGGGCGTA | 1977 |
| FRI_Edi-0   | CCAAGGAGCCAGCGAAGTTTGTATTGGATTGTATTGGCAAGTTTTACTTACAAGGGCGTA | 1977 |
| FRI_Ren-1   | CCAAGGAGCCAGCGAAGTTTGTATTGGATTGTATTGGCAAGTTTTACTTACAAGGGCGTA | 1606 |
| FRI_Nok-3   | CCAAGGAGCCAGCGAAGTTTGTATTGGATTGTATTGGCAAGTTTTACTTACAAGGGCGTA | 1977 |
| FRI_Sha     | CCAAGGAGCCAGCGAAGTTTGTATTGGATTGTATTGGCAAGTTTTACTTACAAGGGCGTA | 1977 |
| FRI_Wa-1    | CCAAGGAGCCAGCGAAGTTTGTATTGGATTGTATTGGCAAGTTTTACTTACAAGGGCGTA | 1977 |
| FRI_Spr-1-6 | CCAAGGAGCCAGCGAAGTTTGTATTGGATTGTATTGGCAAGTTTTACTTACAAGGGCGTA | 1977 |
| FRI_Bil-7   | CCAAGGAGCCAGCGAAGTTTGTATTGGATTGTATTGGCAAGTTTTACTTACAAGGGCGTA | 1977 |
| FRI_Alc-0   | CCAAGGAGCCAGCGAAGTTTGTATTGGATTGTATTGGCAAGTTTTACTTACAAGGGCGTA | 1977 |
| FRI_Pu-2-23 | CCAAGGAGCCAGCGAAGTTTGTATTGGATTGTATTGGCAAGTTTTACTTACAAGGGCGTA | 1980 |
| FRI_NFA-10  | CCAAGGAGCCAGCGAAGTTTGTATTGGATTGTATTGGCAAGTTTTACTTACAAGGGCGTA | 1979 |
| FRI_Cvi-0   | CCAAGGAGCCAGCGAAGTTTGTATTGGATTGTATTGGCAAGTTTTACTTACAAGGGCGTA | 1980 |
| FRI_Zdr-6   | CCAAGGAGCCAGCGAAGTTTGTATTGGATTGTATTGGCAAGTTTTACTTACAAGGGCGTA | 1980 |

\*\*\*\*\*

|             |                                                              |      |
|-------------|--------------------------------------------------------------|------|
| FRI_An-1    | GAGCATTTACTAAAGAGTCGCCTATGAGCTCTGCGAGACAAGTTTCGCTTCTTATACTGG | 2037 |
| FRI_Pro-0   | GAGCATTTACTAAAGAGTCGCCTATGAGCTCTGCGAGACAAGTTTCGCTTCTTATACTGG | 2039 |
| FRI_Bål-2   | GAGCATTTACTAAAGAGTCGCCTATGAGCTCTGCGAGACAAGTTTCGCTTCTTATACTGG | 2037 |
| FRI_St-0    | GAGCATTTACTAAAGAGTCGCCTATGAGCTCTGCGAGACAAGTTTCGCTTCTTATACTGG | 1966 |
| FRI_Bg-2    | GAGCATTTACTAAAGAGTCGCCTATGAGCTCTGCGAGACAAGTTTCGCTTCTTATACTGG | 2035 |
| FRI_C24     | GAGCATTTACTAAAGAGTCGCCTATGAGCTCTGCGAGACAAGTTTCGCTTCTTATACTGG | 2035 |
| FRI_Van-0   | GAGCATTTACTAAAGAGTCGCCTATGAGCTCTGCGAGACAAGTTTCGCTTCTTATACTGG | 2035 |
| FRI_Ull-2-3 | GAGCATTTACTAAAGAGTCGCCTATGAGCTCTGCGAGACAAGTTTCGCTTCTTATACTGG | 2038 |
| FRI_Lip-0   | GAGCATTTACTAAAGAGTCGCCTATGAGCTCTGCGAGACAAGTTTCGCTTCTTATACTGG | 2038 |
| FRI_NFA-8   | GAGCATTTACTAAAGAGTCGCCTATGAGCTCTGCGAGACAAGTTTCGCTTCTTATACTGG | 2037 |
| FRI_Edi-0   | GAGCATTTACTAAAGAGTCGCCTATGAGCTCTGCGAGACAAGTTTCGCTTCTTATACTGG | 2037 |
| FRI_Ren-1   | GAGCATTTACTAAAGAGTCGCCTATGAGCTCTGCGAGACAAGTTTCGCTTCTTATACTGG | 1666 |
| FRI_Nok-3   | GAGCATTTACTAAAGAGTCGCCTATGAGCTCTGCGAGACAAGTTTCGCTTCTTATACTGG | 2037 |
| FRI_Sha     | GAGCATTTACTAAAGAGTCGCCTATGAGCTCTGCGAGACAAGTTTCGCTTCTTATACTGG | 2037 |
| FRI_Wa-1    | GAGCATTTACTAAAGAGTCGCCTATGAGCTCTGCGAGACAAGTTTCGCTTCTTATACTGG | 2037 |
| FRI_Spr-1-6 | GAGCATTTACTAAAGAGTCGCCTATGAGCTCTGCGAGACAAGTTTCGCTTCTTATACTGG | 2037 |
| FRI_Bil-7   | GAGCATTTACTAAAGAGTCGCCTATGAGCTCTGCGAGACAAGTTTCGCTTCTTATACTGG | 2037 |
| FRI_Alc-0   | GAGCATTTACTAAAGAGTCGCCTATGAGCTCTGCGAGACAAGTTTCGCTTCTTATACTGG | 2037 |
| FRI_Pu-2-23 | GAGCATTTACTAAAGAGTCGCCTATGAGCTCTGCGAGACAAGTTTCGCTTCTTATACTGG | 2040 |
| FRI_NFA-10  | GAGCATTTACTAAAGAGTCGCCTATGAGCTCTGCGAGACAAGTTTCGCTTCTTATACTGG | 2039 |
| FRI_Cvi-0   | GAGCATTTACTAAAGAGTCGCCTATGAGCTCTGCGAGACAAGTTTCGCTTCTTATACTGG | 2040 |
| FRI_Zdr-6   | GAGCATTTACTAAAGAGTCGCCTATGAGCTCTGCGAGACAAGTTTCGCTTCTTATACTGG | 2040 |

\*\*\*\*\*

|             |                                                              |      |
|-------------|--------------------------------------------------------------|------|
| FRI_An-1    | AGTCTTTTCTTCTAATGCCTGATCGTGGTAAAGGGAAGGTGAAGATTGAGAGTTGGATTA | 2097 |
| FRI_Pro-0   | AGTCTTTTCTTCTAATGCCTGATCGTGGTAAAGGGAAGGTGAAGATTGAGAGTTGGATTA | 2099 |
| FRI_Bål-2   | AGTCTTTTCTTCTAATGCCTGATCGTGGTAAAGGGAAGGTGAAGATTGAGAGTTGGATTA | 2097 |
| FRI_St-0    | AGTCTTTTCTTCTAATGCCTGATCGTGGTAAAGGGAAGGTGAAGATTGAGAGTTGGATTA | 2026 |
| FRI_Bg-2    | AGTCTTTTCTTCTAATGCCTGATCGTGGTAAAGGGAAGGTGAAGATTGAGAGTTGGATTA | 2095 |
| FRI_C24     | AGTCTTTTCTTCTAATGCCTGATCGTGGTAAAGGGAAGGTGAAGATTGAGAGTTGGATTA | 2095 |
| FRI_Van-0   | AGTCTTTTCTTCTAATGCCTGATCGTGGTAAAGGGAAGGTGAAGATTGAGAGTTGGATTA | 2095 |
| FRI_Ull-2-3 | AGTCTTTTCTTCTAATGCCTGATCGTGGTAAAGGGAAGGTGAAGATTGAGAGTTGGATTA | 2098 |
| FRI_Lip-0   | AGTCTTTTCTTCTAATGCCTGATCGTGGTAAAGGGAAGGTGAAGATTGAGAGTTGGATTA | 2098 |
| FRI_NFA-8   | AGTCTTTTCTTCTAATGCCTGATCGTGGTAAAGGGAAGGTGAAGATTGAGAGTTGGATTA | 2097 |
| FRI_Edi-0   | AGTCTTTTCTTCTAATGCCTGATCGTGGTAAAGGGAAGGTGAAGATTGAGAGTTGGATTA | 2097 |
| FRI_Ren-1   | AGTCTTTTCTTCTAATGCCTGATCGTGGTAAAGGGAAGGTGAAGATTGAGAGTTGGATTA | 1726 |
| FRI_Nok-3   | AGTCTTTTCTTCTAATGCCTGATCGTGGTAAAGGGAAGGTGAAGATTGAGAGTTGGATTA | 2097 |
| FRI_Sha     | AGTCTTTTCTTCTAATGCCTGATCGTGGTAAAGGGAAGGTGAAGATTGAGAGTTGGATTA | 2097 |
| FRI_Wa-1    | AGTCTTTTCTTCTAATGCCTGATCGTGGTAAAGGGAAGGTGAAGATTGAGAGTTGGATTA | 2097 |
| FRI_Spr-1-6 | AGTCTTTTCTTCTAATGCCTGATCGTGGTAAAGGGAAGGTGAAGATTGAGAGTTGGATTA | 2097 |
| FRI_Bil-7   | AGTCTTTTCTTCTAATGCCTGATCGTGGTAAAGGGAAGGTGAAGATTGAGAGTTGGATTA | 2097 |
| FRI_Alc-0   | AGTCTTTTCTTCTAATGCCTGATCGTGGTAAAGGGAAGGTGAAGATTGAGAGTTGGATTA | 2097 |
| FRI_Pu-2-23 | AGTCTTTTCTTCTAATGCCTGATCGTGGTAAAGGGAAGGTGAAGATTGAGAGTTGGATTA | 2100 |
| FRI_NFA-10  | AGTCTTTTCTTCTAATGCCTGATCGTGGTAAAGGGAAGGTGAAGATTGAGAGTTGGATTA | 2099 |
| FRI_Cvi-0   | AGTCTTTTCTTCTAATGCCTGATCGTGGTAAAGGGAAGGTGAAGATTGAGAGTTGGATTA | 2100 |
| FRI_Zdr-6   | AGTCTTTTCTTCTAATGCCTGATCGTGGTAAAGGGAAGGTGAAGATTGAGAGTTGGATTA | 2100 |

\*\*\*\*\*

|           |                                                              |      |
|-----------|--------------------------------------------------------------|------|
| FRI_An-1  | AAGATGAGGCGGAGACGGCTGCTGTTGCTTGGAGGAAAAGGTTGATGACTGAAGGAGGAT | 2157 |
| FRI_Pro-0 | AAGATGAGGCGGAGACGGCTGCTGTTGCTTGGAGGAAAAGGTTGATGACTGAAGGAGGAT | 2159 |
| FRI_Bål-2 | AAGATGAGGCGGAGACGGCTGCTGTTGCTTGGAGGAAAAGGTTGATGACTGAAGGAGGAT | 2157 |
| FRI_St-0  | AAGATGAGGCGGAGACGGCTGCTGTTGCTTGGAGGAAAAGGTTGATGACTGAAGGAGGAT | 2086 |
| FRI_Bg-2  | AAGATGAGGCGGAGACGGCTGCTGTTGCTTGGAGGAAAAGGTTGATGACTGAAGGAGGAT | 2155 |

|             |                                                              |      |
|-------------|--------------------------------------------------------------|------|
| FRI_C24     | AAGATGAGGCGGAGACGGCTGCTGTTGCTTGGAGGAAAAGGTTGATGACTGAAGGAGGAT | 2155 |
| FRI_Van-0   | AAGATGAGGCGGAGACGGCTGCTGTTGCTTGGAGGAAAAGGTTGATGACTGAAGGAGGAT | 2155 |
| FRI_Ull-2-3 | AAGATGAGGCGGAGACGGCTGCTGTTGCTTGGAGGAAAAGGTTGATGACTGAAGGAGGAT | 2158 |
| FRI_Lip-0   | AAGATGAGGCGGAGACGGCTGCTGTTGCTTGGAGGAAAAGGTTGATGACTGAAGGAGGAT | 2158 |
| FRI_NFA-8   | AAGATGAGGCGGAGACGGCTGCTGTTGCTTGGAGGAAAAGGTTGATGACTGAAGGAGGAT | 2157 |
| FRI_Edi-0   | AAGATGAGGCGGAGACGGCTGCTGTTGCTTGGAGGAAAAGGTTGATGACTGAAGGAGGAT | 2157 |
| FRI_Ren-1   | AAGATGAGGCGGAGACGGCTGCTGTTGCTTGGAGGAAAAGGTTGATGACTGAAGGAGGAT | 1786 |
| FRI_Nok-3   | AAGATGAGGCGGAGACGGCTGCTGTTGCTTGGAGGAAAAGGTTGATGACTGAAGGAGGAT | 2157 |
| FRI_Sha     | AAGATGAGGCGGAGACGGCTGCTGTTGCTTGGAGGAAAAGGTTGATGACTGAAGGAGGAT | 2157 |
| FRI_Wa-1    | AAGATGAGGCGGAGACGGCTGCTGTTGCTTGGAGGAAAAGGTTGATGACTGAAGGAGGAT | 2157 |
| FRI_Spr-1-6 | AAGATGAGGCGGAGACGGCTGCTGTTGCTTGGAGGAAAAGGTTGATGACTGAAGGAGGAT | 2157 |
| FRI_Bil-7   | AAGATGAGGCGGAGACGGCTGCTGTTGCTTGGAGGAAAAGGTTGATGACTGAAGGAGGAT | 2157 |
| FRI_Alc-0   | AAGATGAGGCGGAGACGGCTGCTGTTGCTTGGAGGAAAAGGTTGATGACTGAAGGAGGAT | 2157 |
| FRI_Pu-2-23 | AAGATGAGGCGGAGACGGCTGCTGTTGCTTGGAGGAAAAGGTTGATGACTGAAGGAGGAT | 2160 |
| FRI_NFA-10  | AAGATGAGGCGGAGACGGCTGCTGTTGCTTGGAGGAAAAGGTTGATGACTGAAGGAGGAT | 2159 |
| FRI_Cvi-0   | AAGATGAGGCGGAGACGGCTGCTGTTGCTTGGAGGAAAAGGTTGATGACTGAAGGAGGAT | 2160 |
| FRI_Zdr-6   | AAGATGAGGCGGAGACGGCTGCTGTTGCTTGGAGGAAAAGGTTGATGACTGAAGGAGGAT | 2160 |

\*\*\*\*\*

|             |                                                             |      |
|-------------|-------------------------------------------------------------|------|
| FRI_An-1    | TAGCTGCGGCTGAGAAAATGGATGCAAGGGGTTTGCTTTTACTAGTTGCTGTTTTGGTG | 2217 |
| FRI_Pro-0   | TAGCTGCGGCTGAGAAAATGGATGCAAGGGGTTTGCTTTTACTAGTTGCTGTTTTGGTG | 2219 |
| FRI_Bâl-2   | TAGCTGCGGCTGAGAAAATGGATGCAAGGGGTTTGCTTTTACGAGTTGCTGTTTTGGTG | 2217 |
| FRI_St-0    | TAGCTGCGGCTGAGAAAATGGATGCAAGGGGTTTGCTTTTACTAGTTGCTGTTTTGGTG | 2146 |
| FRI_Bg-2    | TAGCTGCGGCTGAGAAAATGGATGCAAGGGGTTTGCTTTTACTAGTTGCTGTTTTGGTG | 2215 |
| FRI_C24     | TAGCTGCGGCTGAGAAAATGGATGCAAGGGGTTTGCTTTTACTAGTTGCTGTTTTGGTG | 2215 |
| FRI_Van-0   | TAGCTGCGGCTGAGAAAATGGATGCAAGGGGTTTGCTTTTACTAGTTGCTGTTTTGGTG | 2215 |
| FRI_Ull-2-3 | TAGCTGCGGCTGAGAAAATGGATGCAAGGGGTTTGCTTTTACTAGTTGCTGTTTTGGTG | 2218 |
| FRI_Lip-0   | TAGCTGCGGCTGAGAAAATGGATGCAAGGGGTTTGCTTTTACTAGTTGCTGTTTTGGTG | 2217 |
| FRI_NFA-8   | TAGCTGCGGCTGAGAAAATGGATGCAAGGGGTTTGCTTTTACTAGTTGCTGTTTTGGTG | 2217 |
| FRI_Edi-0   | TAGCTGCGGCTGAGAAAATGGATGCAAGGGGTTTGCTTTTACTAGTTGCTGTTTTGGTG | 2217 |
| FRI_Ren-1   | TAGCTGCGGCTGAGAAAATGGATGCAAGGGGTTTGCTTTTACTAGTTGCTGTTTTGGTG | 1846 |
| FRI_Nok-3   | TAGCTGCGGCTGAGAAAATGGATGCAAGGGGTTTGCTTTTACTAGTTGCTGTTTTGGTG | 2217 |
| FRI_Sha     | TAGCTGCGGCTGAGAAAATGGATGCAAGGGGTTTGCTTTTACTAGTTGCTGTTTTGGTG | 2217 |
| FRI_Wa-1    | TAGCTGCGGCTGAGAAAATGGATGCAAGGGGTTTGCTTTTACTAGTTGCTGTTTTGGTG | 2217 |
| FRI_Spr-1-6 | TAGCTGCGGCTGAGAAAATGGATGCAAGGGGTTTGCTTTTACTAGTTGCTGTTTTGGTG | 2217 |
| FRI_Bil-7   | TAGCTGCGGCTGAGAAAATGGATGCAAGGGGTTTGCTTTTACTAGTTGCTGTTTTGGTG | 2217 |
| FRI_Alc-0   | TAGCTGCGGCTGAGAAAATGGATGCAAGGGGTTTGCTTTTACTAGTTGCTGTTTTGGTG | 2217 |
| FRI_Pu-2-23 | TAGCTGCGGCTGAGAAAATGGATGCAAGGGGTTTGCTTTTACTAGTTGCTGTTTTGGTG | 2220 |
| FRI_NFA-10  | TAGCTGCGGCTGAGAAAATGGATGCAAGGGGTTTGCTTTTACTAGTTGCTGTTTTGGTG | 2219 |
| FRI_Cvi-0   | TAGCTGCGGCTGAGAAAATGGATGCAAGGGGTTTGCTTTTACTAGTTGCTGTTTTGGTG | 2220 |
| FRI_Zdr-6   | TAGCTGCGGCTGAGAAAATGGATGCAAGGGGTTTGCTTTTACTAGTTGCTGTTTTGGTG | 2220 |

\*\*\*\*\*

|             |                                                              |      |
|-------------|--------------------------------------------------------------|------|
| FRI_An-1    | TTCTTCAAACCTTTAGGAGTACAGATTTGCTGGAT-TTGATAAGGATGAGTGGTTCGAAT | 2276 |
| FRI_Pro-0   | TTCTTCAAACCTTTAGGAGTACAGATTTGCTGGAT-TTGATAAGGATGAGTGGTTCGAAT | 2278 |
| FRI_Bâl-2   | TTCTTCAAACCTTTAGGAGTACAGATTTGCTGGAT-TTGATAAGGATGAGTGGTTCGAAT | 2276 |
| FRI_St-0    | TTCTTCAAACCTTTAGGAGTACAGATTTGCTGGAT-TTGATAAGGATGAGTGGTTCGAAT | 2205 |
| FRI_Bg-2    | TTCTTCAAACCTTTAGGAGTACAGATTTGCTGGAT-TTGATAAGGATGAGTGGTTCGAAT | 2274 |
| FRI_C24     | TTCTTCAAACCTTTAGGAGTACAGATTTGCTGGAT-TTGATAAGGATGAGTGGTTCGAAT | 2274 |
| FRI_Van-0   | TTCTTCAAACCTTTAGGAGTACAGATTTGCTGGAT-TTGATAAGGATGAGTGGTTCGAAT | 2274 |
| FRI_Ull-2-3 | TTCTTCAAACCTTTAGGAGTACAGATTTGCTGGAT-TTGATAAGGATGAGTGGTTCGAAT | 2277 |
| FRI_Lip-0   | TTCTTCAAACCTTTAGGAGTACAGATTTGCTGGAT-TTGATAAGGATGAGTGGTTCGAAT | 2277 |
| FRI_NFA-8   | TTCTTCAAACCTTTAGGAGTACAGATTTGCTGGAT-TTGATAAGGATGAGTGGTTCGAAT | 2277 |
| FRI_Edi-0   | TTCTTCAAACCTTTAGGAGTACAGATTTGCTGGAT-TTGATAAGGATGAGTGGTTCGAAT | 2276 |
| FRI_Ren-1   | TTCTTCAAACCTTTAGGAGTACAGATTTGCTGGAT-TTGATAAGGATGAGTGGTTCGAAT | 1905 |
| FRI_Nok-3   | TTCTTCAAACCTTTAGGAGTACAGATTTGCTGGAT-TTGATAAGGATGAGTGGTTCGAAT | 2276 |
| FRI_Sha     | TTCTTCAAACCTTTAGGAGTACAGATTTGCTGGAT-TTGATAAGGATGAGTGGTTCGAAT | 2276 |
| FRI_Wa-1    | TTCTTCAAACCTTTAGGAGTACAGATTTGCTGGAT-TTGATAAGGATGAGTGGTTCGAAT | 2276 |
| FRI_Spr-1-6 | TTCTTCAAACCTTTAGGAGTACAGATTTGCTGGAT-TTGATAAGGATGAGTGGTTCGAAT | 2276 |
| FRI_Bil-7   | TTCTTCAAACCTTTAGGAGTACAGATTTGCTGGAT-TTGATAAGGATGAGTGGTTCGAAT | 2276 |
| FRI_Alc-0   | TTCTTCAAACCTTTAGGAGTACAGATTTGCTGGAT-TTGATAAGGATGAGTGGTTCGAAT | 2276 |
| FRI_Pu-2-23 | TTCTTCAAACCTTTAGGAGTACAGATTTGCTGGAT-TTGATAAGGATGAGTGGTTCGAAT | 2279 |
| FRI_NFA-10  | TTCTTCAAACCTTTAGGAGTACAGATTTGCTGGAT-TTGATAAGGATGAGTGGTTCGAAT | 2278 |
| FRI_Cvi-0   | TTCTTCAAACCTTTAGGAGTACAGATTTGCTGGAT-TTGATAAGGATGAGTGGTTCGAAT | 2279 |
| FRI_Zdr-6   | TTCTTCAAACCTTTAGGAGTACAGATTTGCTGGAT-TTGATAAGGATGAGTGGTTCGAAT | 2279 |

\*\*\*\*\*

|           |                                                            |      |
|-----------|------------------------------------------------------------|------|
| FRI_An-1  | GAGATTGCCGGTGCTTTGAAGCGGTACAGTTTCTTGTCCTATGGTCTCAGGTACCATA | 2336 |
| FRI_Pro-0 | GAGATTGCCGGTGCTTTGAAGCGGTACAGTTTCTTGTCCTATGGTCTCAGGTACCATA | 2338 |
| FRI_Bâl-2 | GGGATTGCCGGTGCTTTGAAGCGGTACAGTTTCTTGTCCTATGGTCTCAGGTACCATA | 2336 |
| FRI_St-0  | GAGATTGCCGGTGCTTTGAAGCGGTACAGTTTCTTGTCCTATGGTCTCAGGTACCATA | 2265 |

|             |                                                              |      |
|-------------|--------------------------------------------------------------|------|
| FRI_Bg-2    | GAGATTGCCGGTGCTTTGAAGCGGTACACAGTTTCTTGTCCTATGGTCTCAGGTACCATA | 2334 |
| FRI_C24     | GAGATTGCCGGTGCTTTGAAGCGGTACACAGTTTCTTGTCCTATGGTCTCAGGTACCATA | 2334 |
| FRI_Van-0   | GAGATTGCCGGTGCTTTGAAGCGGTACACAGTTTCTTGTCCTATGGTCTCAGGTACCATA | 2334 |
| FRI_Ull-2-3 | GAGATTGCCGGTGCTTTGAAGCGGTACACAGTTTCTTGTCCTATGGTCTCAGGTACCATA | 2337 |
| FRI_Lip-0   | GAGATTGCCGGTGCTTTGAAGCGGTACACAGTTTCTTGTCCTATGGTCTCAGGTACCATA | 2337 |
| FRI_NFA-8   | GAGATTGCCGGTGCTTTGAAGCGGTACACAGTTTCTTGTCCTATGGTCTCAGGTACCATA | 2337 |
| FRI_Edi-0   | GAGATTGCCGGTGCTTTGAAGCGGTACACAGTTTCTTGTCCTATGGTCTCAGGTACCATA | 2336 |
| FRI_Ren-1   | GAGATTGCCGGTGCTTTGAAGCGGTACACAGTTTCTTGTCCTATGGTCTCAGGTACCATA | 1965 |
| FRI_Nok-3   | GAGATTGCCGGTGCTTTGAAGCGGTACACAGTTTCTTGTCCTATGGTCTCAGGTACCATA | 2336 |
| FRI_Sha     | GAGATTGCCGGTGCTTTGAAGCGGTACACAGTTTCTTGTCCTATGGTCTCAGGTACCATA | 2336 |
| FRI_Wa-1    | GAGATTGCCGGTGCTTTGAAGCGGTACACAGTTTCTTGTCCTATGGTCTCAGGTACCATA | 2336 |
| FRI_Spr-1-6 | GAGATTGCCGGTGCTTTGAAGCGGTACACAGTTTCTTGTCCTATGGTCTCAGGTACCATA | 2336 |
| FRI_Bil-7   | GAGATTGCCGGTGCTTTGAAGCGGTACACAGTTTCTTGTCCTATGGTCTCAGGTACCATA | 2336 |
| FRI_Alc-0   | GAGATTGCCGGTGCTTTGAAGCGGTACACAGTTTCTTGTCCTATGGTCTCAGGTACCATA | 2336 |
| FRI_Pu-2-23 | GAGATTGCCGGTGCTTTGAAGCGGTACACAGTTTCTTGTCCTATGGTCTCAGGTACCATA | 2339 |
| FRI_NFA-10  | GAGATTGCCGGTGCTTTGAAGCGGTACACAGTTTCTTGTCCTATGGTCTCAGGTACCATA | 2338 |
| FRI_Cvi-0   | GAGATTGCCGGTGCTTTGAAGCGGTACACAGTTTCTTGTCCTATGGTCTCAGGTACCATA | 2339 |
| FRI_Zdr-6   | GAGATTGCCGGTGCTTTGAAGCGGTACACAGTTTCTTGTCCTATGGTCTCAGGTACCATA | 2339 |
|             | * ****                                                       |      |

|             |                                                             |      |
|-------------|-------------------------------------------------------------|------|
| FRI_An-1    | TTCTGTCTCACTCGGTGAATTTTCATTGCAAAGGTGGTTCCTTTTGTGACATCATCGAC | 2396 |
| FRI_Pro-0   | TTCTGTCTCACTCGGTGAATTTTCATTGCAAAGGTGGTTCCTTTTGTGACATCATCGAC | 2398 |
| FRI_Bâ1-2   | TTCTGTCTCACTCGGTGAATTTTCATTGCAAAGGTGGTTCCTTTTGTGACATCATCGAC | 2396 |
| FRI_St-0    | TTCTGTCTCACTCGGTGAATTTTCATTGCAAAGGTGGTTCCTTTTGTGACATCATCGAC | 2325 |
| FRI_Bg-2    | TTCTGTCTCACTCGGTGAATTTTCATTGCAAAGGTGGTTCCTTTTGTGACATCATCGAC | 2393 |
| FRI_C24     | TTCTGTCTCACTCGGTGAATTTTCATTGCAAAGGTGGTTCCTTTTGTGACATCATCGAC | 2394 |
| FRI_Van-0   | TTCTGTCTCACTCGGTGAATTTTCATTGCAAAGGTGGTTCCTTTTGTGACATCATCGAC | 2394 |
| FRI_Ull-2-3 | TTCTGTCTCACTCGGTGAATTTTCATTGCAAAGGTGGTTCCTTTTGTGACATCATCGAC | 2397 |
| FRI_Lip-0   | TTCTGTCTCACTCGGTGAATTTTCATTGCAAAGGTGGTTCCTTTTGTGACATCATCGAC | 2397 |
| FRI_NFA-8   | TTCTGTCTCACTCGGTGAATTTTCATTGCAAAGGTGGTTCCTTTTGTGACATCATCGAC | 2397 |
| FRI_Edi-0   | TTCTGTCTCACTCGGTGAATTTTCATTGCAAAGGTGGTTCCTTTTGTGACATCATCGAC | 2396 |
| FRI_Ren-1   | TTCTGTCTCACTCGGTGAATTTTCATTGCAAAGGTGGTTCCTTTTGTGACATCATCGAC | 2025 |
| FRI_Nok-3   | TTCTGTCTCACTCGGTGAATTTTCATTGCAAAGGTGGTTCCTTTTGTGACATCATCGAC | 2396 |
| FRI_Sha     | TTCTGTCTCACTCGGTGAATTTTCATTGCAAAGGTGGTTCCTTTTGTGACATCATCGAC | 2396 |
| FRI_Wa-1    | TTCTGTCTCACTCGGTGAATTTTCATTGCAAAGGTGGTTCCTTTTGTGACATCATCGAC | 2396 |
| FRI_Spr-1-6 | TTCTGTCTCACTCGGTGAATTTTCATTGCAAAGGTGGTTCCTTTTGTGACATCATCGAC | 2396 |
| FRI_Bil-7   | TTCTGTCTCACTCGGTGAATTTTCATTGCAAAGGTGGTTCCTTTTGTGACATCATCGAC | 2396 |
| FRI_Alc-0   | TTCTGTCTCACTCGGTGAATTTTCATTGCAAAGGTGGTTCCTTTTGTGACATCATCGAC | 2396 |
| FRI_Pu-2-23 | TTCTGTCTCACTCGGTGAATTTTCATTGCAAAGGTGGTTCCTTTTGTGACATCATCGAC | 2399 |
| FRI_NFA-10  | TTCTGTCTCACTCGGTGAATTTTCATTGCAAAGGTGGTTCCTTTTGTGACATCATCGAC | 2398 |
| FRI_Cvi-0   | TTCTGTCTCACTCGGTGAATTTTCATTGCAAAGGTGGTTCCTTTTGTGACATCATCGAC | 2399 |
| FRI_Zdr-6   | TTCTGTCTCACTCGGTGAATTTTCATTGCAAAGGTGGTTCCTTTTGTGACATCATCGAC | 2399 |
|             | *****                                                       |      |

|             |                                                             |      |
|-------------|-------------------------------------------------------------|------|
| FRI_An-1    | CAACATCAAGTTCATCTTTGTTTTTCGATAAGCTTGATGGTATAAACTAGGAGAGCACA | 2456 |
| FRI_Pro-0   | CAACATCAAGTTCATCTTTGTTTTTCGATAAGCTTGATGGTATAAACTAGGAGAGCACA | 2458 |
| FRI_Bâ1-2   | CAACATCAAGTTCATCTTTGTTTTTCGATAAGCTTGATGGTATAAACTAGGAGAGCACA | 2456 |
| FRI_St-0    | CAACATCAAGTTCATCTTTGTTTTTCGATAAGCTTGATGGTATAAACTAGGAGAGCACA | 2385 |
| FRI_Bg-2    | CAACATCAAGTTCATCTTTGTTTTTCGATAAGCTTGATGGTATAAACTAGGAGAGCACA | 2453 |
| FRI_C24     | CAACATCAAGTTCATCTTTGTTTTTCGATAAGCTTGATGGTATAAACTAGGAGAGCACA | 2454 |
| FRI_Van-0   | CAACATCAAGTTCATCTTTGTTTTTCGATAAGCTTGATGGTATAAACTAGGAGAGCACA | 2454 |
| FRI_Ull-2-3 | CAACATCAAGTTCATCTTTGTTTTTCGATAAGCTTGATGGTATAAACTAGGAGAGCACA | 2457 |
| FRI_Lip-0   | CAACATCAAGTTCATCTTTGTTTTTCGATAAGCTTGATGGTATAAACTAGGAGAGCACA | 2457 |
| FRI_NFA-8   | CAACATCAAGTTCATCTTTGTTTTTCGATAAGCTTGATGGTATAAACTAGGAGAGCACA | 2457 |
| FRI_Edi-0   | CAACATCAAGTTCATCTTTGTTTTTCGATAAGCTTGATGGTATAAACTAGGAGAGCACA | 2456 |
| FRI_Ren-1   | CAACATCAAGTTCATCTTTGTTTTTCGATAAGCTTGATGGTATAAACTAGGAGAGCACA | 2085 |
| FRI_Nok-3   | CAACATCAAGTTCATCTTTGTTTTTCGATAAGCTTGATGGTATAAACTAGGAGAGCACA | 2456 |
| FRI_Sha     | CAACATCAAGTTCATCTTTGTTTTTCGATAAGCTTGATGGTATAAACTAGGAGAGCACA | 2456 |
| FRI_Wa-1    | CAACATCAAGTTCATCTTTGTTTTTCGATAAGCTTGATGGTATAAACTAGGAGAGCACA | 2456 |
| FRI_Spr-1-6 | CAACATCAAGTTCATCTTTGTTTTTCGATAAGCTTGATGGTATAAACTAGGAGAGCACA | 2456 |
| FRI_Bil-7   | CAACATCAAGTTCATCTTTGTTTTTCGATAAGCTTGATGGTATAAACTAGGAGAGCACA | 2456 |
| FRI_Alc-0   | CAACATCAAGTTCATCTTTGTTTTTCGATAAGCTTGATGGTATAAACTAGGAGAGCACA | 2456 |
| FRI_Pu-2-23 | CAACATCAAGTTCATCTTTGTTTTTCGATAAGCTTGATGGTATAAACTAGGAGAGCACA | 2459 |
| FRI_NFA-10  | CAACATCAAGTTCATCTTTGTTTTTCGATAAGCTTGATGGTATAAACTAGGAGAGCACA | 2458 |
| FRI_Cvi-0   | CAACATCAAGTTCATCTTTGTTTTTCGATAAGCTTGATGGTATAAACTAGGAGAGCACA | 2459 |
| FRI_Zdr-6   | CAACATCAAGTTCATCTTTGTTTTTCGATAAGCTTGATGGTATAAACTAGGAGAGCACA | 2459 |
|             | *****                                                       |      |

|           |                                                              |      |
|-----------|--------------------------------------------------------------|------|
| FRI_An-1  | TCAAATATTTAGAGTGCAATGACTGATTGAGCCAAATCCTAGCTAGAAATTAATCTGGAA | 2516 |
| FRI_Pro-0 | TCAAATATTTAGAGTGCAATGACTGATTGAGCCAAATCCTAGCTAGAAATTAATCTGGAA | 2518 |
| FRI_Bâ1-2 | TCAAATATTTAGAGTGCAATGACTGATTGAGCCAAATCCTAGCTAGAAATTAATCTGGAA | 2516 |

|             |                                                              |      |
|-------------|--------------------------------------------------------------|------|
| FRI_St-0    | TCAAATATTTAGAGTGCAATGACTGATTGAGCCAAATCCTAGCTAGAAATTAATCTGGAA | 2445 |
| FRI_Bg-2    | TCAAATATTTAGAGTGCAATGACTGATTGAGCCAAATCCTAGCTAGAAATTAATCTGGAA | 2513 |
| FRI_C24     | TCAAATATTTAGAGTGCAATGACTGATTGAGCCAAATCCTAGCTAGAAATTAATCTGGAA | 2514 |
| FRI_Van-0   | TCAAATATTTAGAGTGCAATGACTGATTGAGCCAAATCCTAGCTAGAAATTAATCTGGAA | 2514 |
| FRI_Ull-2-3 | TCAAATATTTAGAGTGCAATGACTGATTGAGCCAAATCCTAGCTAGAAATTAATCTGGAA | 2517 |
| FRI_Lip-0   | TCAAATATTTAGAGTGCAATGACTGATTGAGCCAAATCCTAGCTAGAAATTAATCTGGAA | 2517 |
| FRI_NFA-8   | TCAAATATTTAGAGTGCAATGACTGATTGAGCCAAATCCTAGCTAGAAATTAATCTGGAA | 2517 |
| FRI_Edi-0   | TCAAATATTTAGAGTGCAATGACTGATTGAGCCAAATCCTAGCTAGAAATTAATCTGGAA | 2516 |
| FRI_Ren-1   | TCAAATATTTAGAGTGCAATGACTGATTGAGCCAAATCCTAGCTAGAAATTAATCTGGAA | 2145 |
| FRI_Nok-3   | TCAAATATTTAGAGTGCAATGACTGATTGAGCCAAATCCTAGCTAGAAATTAATCTGGAA | 2516 |
| FRI_Sha     | TCAAATATTTAGAGTGCAATGACTGATTGAGCCAAATCCTAGCTAGAAATTAATCTGGAA | 2516 |
| FRI_Wa-1    | TCAAATATTTAGAGTGCAATGACTGATTGAGCCAAATCCTAGCTAGAAATTAATCTGGAA | 2516 |
| FRI_Spr-1-6 | TCAAATATTTAGAGTGCAATGACTGATTGAGCCAAATCCTAGCTAGAAATTAATCTGGAA | 2516 |
| FRI_Bil-7   | TCAAATATTTAGAGTGCAATGACTGATTGAGCCAAATCCTAGCTAGAAATTAATCTGGAA | 2516 |
| FRI_Alc-0   | TCAAATATTTAGAGTGCAATGACTGATTGAGCCAAATCCTAGCTAGAAATTAATCTGGAA | 2516 |
| FRI_Pu-2-23 | TCAAATATTTAGAGTGCAATGACTGATTGAGCCAAATCCTAGCTAGAAATTAATCTGGAA | 2519 |
| FRI_NFA-10  | TCAAATATTTAGAGTGCAATGACTGATTGAGCCAAATCCTAGCTAGAAATTAATCTGGAA | 2518 |
| FRI_Cvi-0   | TCAAATATTTAGAGTGCAATGACTGATTGAGCCAAATCCTAGCTAGAAATTAATCTGGAA | 2519 |
| FRI_Zdr-6   | TCAAATATTTAGAGTGCAATGACTGATTGAGCCAAATCCTAGCTAGAAATTAATCTGGAA | 2519 |

\*\*\*\*\*

|             |                                                              |      |
|-------------|--------------------------------------------------------------|------|
| FRI_An-1    | AGAACTTGGAACTCTCAACCATAGGTTTGGTACGAAATTTGTTGCTTGTCAGAACCAAAT | 2576 |
| FRI_Pro-0   | AGAACTTGGAACTCTCAACCATAGGTTTGGTACGAAATTTGTTGCTTGTCAGAACCAAAT | 2578 |
| FRI_Bâ1-2   | AGAACTTGGAACTCTCAACCATAGGTTTGGTACGAAATTTGTTGCTTGTCAGAACCAAAT | 2576 |
| FRI_St-0    | AGAACTTGGAACTCTCAACCATAGGTTTGGTACGAAATTTGTTGCTTGTCAGAACCAAAT | 2505 |
| FRI_Bg-2    | AGAACTTGGAACTCTCAACCATAGGTTTGGTACGAAATTTGTTGCTTGTCAGAACCAAAT | 2573 |
| FRI_C24     | AGAACTTGGAACTCTCAACCATAGGTTTGGTACGAAATTTGTTGCTTGTCAGAACCAAAT | 2574 |
| FRI_Van-0   | AGAACTTGGAACTCTCAACCATAGGTTTGGTACGAAATTTGTTGCTTGTCAGAACCAAAT | 2574 |
| FRI_Ull-2-3 | AGAACTTGGAACTCTCAACCATAGGTTTGGTACGAAATTTGTTGCTTGTCAGAACCAAAT | 2577 |
| FRI_Lip-0   | AGAACTTGGAACTCTCAACCATAGGTTTGGTACGAAATTTGTTGCTTGTCAGAACCAAAT | 2577 |
| FRI_NFA-8   | AGAACTTGGAACTCTCAACCATAGGTTTGGTACGAAATTTGTTGCTTGTCAGAACCAAAT | 2577 |
| FRI_Edi-0   | AGAACTTGGAACTCTCAACCATAGGTTTGGTACGAAATTTGTTGCTTGTCAGAACCAAAT | 2576 |
| FRI_Ren-1   | AGAACTTGGAACTCTCAACCATAGGTTTGGTACGAAATTTGTTGCTTGTCAGAACCAAAT | 2205 |
| FRI_Nok-3   | AGAACTTGGAACTCTCAACCATAGGTTTGGTACGAAATTTGTTGCTTGTCAGAACCAAAT | 2576 |
| FRI_Sha     | AGAACTTGGAACTCTCAACCATAGGTTTGGTACGAAATTTGTTGCTTGTCAGAACCAAAT | 2576 |
| FRI_Wa-1    | AGAACTTGGAACTCTCAACCATAGGTTTGGTACGAAATTTGTTGCTTGTCAGAACCAAAT | 2576 |
| FRI_Spr-1-6 | AGAACTTGGAACTCTCAACCATAGGTTTGGTACGAAATTTGTTGCTTGTCAGAACCAAAT | 2576 |
| FRI_Bil-7   | AGAACTTGGAACTCTCAACCATAGGTTTGGTACGAAATTTGTTGCTTGTCAGAACCAAAT | 2576 |
| FRI_Alc-0   | AGAACTTGGAACTCTCAACCATAGGTTTGGTACGAAATTTGTTGCTTGTCAGAACCAAAT | 2576 |
| FRI_Pu-2-23 | AGAACTTGGAACTCTCAACCATAGGTTTGGTACGAAATTTGTTGCTTGTCAGAACCAAAT | 2579 |
| FRI_NFA-10  | AGAACTTGGAACTCTCAACCATAGGTTTGGTACGAAATTTGTTGCTTGTCAGAACCAAAT | 2578 |
| FRI_Cvi-0   | AGAACTTGGAACTCTCAACCATAGGTTTGGTACGAAATTTGTTGCTTGTCAGAACCAAAT | 2579 |
| FRI_Zdr-6   | AGAACTTGGAACTCTCAACCATAGGTTTGGTACGAAATTTGTTGCTTGTCAGAACCAAAT | 2579 |

\*\*\*\*\*

|             |                                                             |      |
|-------------|-------------------------------------------------------------|------|
| FRI_An-1    | GATAGGCTATTGCCTTGAAATAGTGTTCCTGTGGTTTCCAATATTGGAAGTTAAAATCA | 2636 |
| FRI_Pro-0   | GATAGGCTATTGCCTTGAAATAGTGTTCCTGTGGTTTCCAATATTGGAAGTTAAAATCA | 2638 |
| FRI_Bâ1-2   | GATAGGCTATTGCCTTGAAATAGTGTTCCTGTGGTTTCCAATATTGGAAGTTAAAATCG | 2636 |
| FRI_St-0    | GATAGGCTATTGCCTTGAAATAGTGTTCCTGTGGTTTCCAATATTGGAAGTTAAAATCA | 2565 |
| FRI_Bg-2    | GATAGGCTATTGCCTTGAAATAGTGTTCCTGTGGTTTCCAATATTGGAAGTTAAAATCA | 2633 |
| FRI_C24     | GATAGGCTATTGCCTTGAAATAGTGTTCCTGTGGTTTCCAATATTGGAAGTTAAAATCA | 2634 |
| FRI_Van-0   | GATAGGCTATTGCCTTGAAATAGTGTTCCTGTGGTTTCCAATATTGGAAGTTAAAATCA | 2634 |
| FRI_Ull-2-3 | GATAGGCTATTGCCTTGAAATAGTGTTCCTGTGGTTTCCAATATTGGAAGTTAAAATCA | 2637 |
| FRI_Lip-0   | GATAGGCTATTGCCTTGAAATAGTGTTCCTGTGGTTTCCAATATTGGAAGTTAAAATCA | 2637 |
| FRI_NFA-8   | GATAGGCTATTGCCTTGAAATAGTGTTCCTGTGGTTTCCAATATTGGAAGTTAAAATCA | 2637 |
| FRI_Edi-0   | GATAGGCTATTGCCTTGAAATAGTGTTCCTGTGGTTTCCAATATTGGAAGTTAAAATCA | 2636 |
| FRI_Ren-1   | GATAGGCTATTGCCTTGAAATAGTGTTCCTGTGGTTTCCAATATTGGAAGTTAAAATCA | 2265 |
| FRI_Nok-3   | GATAGGCTATTGCCTTGAAATAGTGTTCCTGTGGTTTCCAATATTGGAAGTTAAAATCA | 2636 |
| FRI_Sha     | GATAGGCTATTGCCTTGAAATAGTGTTCCTGTGGTTTCCAATATTGGAAGTTAAAATCA | 2636 |
| FRI_Wa-1    | GATAGGCTATTGCCTTGAAATAGTGTTCCTGTGGTTTCCAATATTGGAAGTTAAAATCA | 2636 |
| FRI_Spr-1-6 | GATAGGCTATTGCCTTGAAATAGTGTTCCTGTGGTTTCCAATATTGGAAGTTAAAATCA | 2636 |
| FRI_Bil-7   | GATAGGCTATTGCCTTGAAATAGTGTTCCTGTGGTTTCCAATATTGGAAGTTAAAATCG | 2636 |
| FRI_Alc-0   | GATAGGCTATTGCCTTGAAATAGTGTTCCTGTGGTTTCCAATATTGGAAGTTAAAATCG | 2636 |
| FRI_Pu-2-23 | GATAGGCTATTGCCTTGAAATAGTGTTCCTGTGGTTTCCAATATTGGAAGTTAAAATCA | 2639 |
| FRI_NFA-10  | GATAGGCTATTGCCTTGAAATAGTGTTCCTGTGGTTTCCAATATTGGAAGTTAAAATCA | 2638 |
| FRI_Cvi-0   | GATAGGCTATTGCCTTGAAATAGTGTTCCTGTGGTTTCCAATATTGGAAGTTAAAATCA | 2639 |
| FRI_Zdr-6   | GATAGGCTATTGCCTTGAAATAGTGTTCCTGTGGTTTCCAATATTGGAAGTTAAAATCA | 2639 |

\*\*\*\*\*

|           |                                                              |      |
|-----------|--------------------------------------------------------------|------|
| FRI_An-1  | TATGACTTAGCTGTTGGATACTAATTAAGCTTAAGCAATGCCAECTCTAAGAAGTGGTAC | 2696 |
| FRI_Pro-0 | TATGACTTAGCTGTTGGATACTAATTAAGCTTAAGCAATGCCAECTCTAAGAAGTGGTAC | 2698 |

|             |                                                              |      |
|-------------|--------------------------------------------------------------|------|
| FRI_Bâ1-2   | TATGACTTAGCTGTTGGATACTAATTAAGCTTAAGCAATGCCAACTCTAAGAAGTGGTAC | 2696 |
| FRI_St-0    | TATGACTTAGCTGTTGGATACTAATTAAGCTTAAGCAATGCCAACTCTAAGAAGTGGTAC | 2625 |
| FRI_Bg-2    | TATGACTTAGCTGTTGGATACTAATTAAGCTTAAGCAATGCCAACTCTAAGAAGTGGTAC | 2693 |
| FRI_C24     | TATGACTTAGCTGTTGGATACTAATTAAGCTTAAGCAATGCCAACTCTAAGAAGTGGTAC | 2694 |
| FRI_Van-0   | TATGACTTAGCTGTTGGATACTAATTAAGCTTAAGCAATGCCAACTCTAAGAAGTGGTAC | 2694 |
| FRI_Ull-2-3 | TATGACTTAGCTGTTGGATACTAATTAAGCTTAAGCAATGCCAACTCTAAGAAGTGGTAC | 2697 |
| FRI_Lip-0   | TATGACTTAGCTGTTGGATACTAATTAAGCTTAAGCAATGCCAACTCTAAGAAGTGGTAC | 2697 |
| FRI_NFA-8   | TATGACTTAGCTGTTGGATACTAATTAAGCTTAAGCAATGCCAACTCTAAGAAGTGGTAC | 2697 |
| FRI_Edi-0   | TATGACTTAGCTGTTGGATACTAATTAAGCTTAAGCAATGCCAACTCTAAGAAGTGGTAC | 2696 |
| FRI_Ren-1   | TATGACTTAGCTGTTGGATACTAATTAAGCTTAAGCAATGCCAACTCTAAGAAGTGGTAC | 2325 |
| FRI_Nok-3   | TATGACTTAGCTGTTGGATACTAATTAAGCTTAAGCAATGCCAACTCTAAGAAGTGGTAC | 2696 |
| FRI_Sha     | TATGACTTAGCTGTTGGATACTAATTAAGCTTAAGCAATGCCAACTCTAAGAAGTGGTAC | 2696 |
| FRI_Wa-1    | TATGACTTAGCTGTTGGATACTAATTAAGCTTAAGCAATGCCAACTCTAAGAAGTGGTAC | 2696 |
| FRI_Spr-1-6 | TATGACTTAGCTGTTGGATACTAATTAAGCTTAAGCAATGCCAACTCTAAGAAGTGGTAC | 2696 |
| FRI_Bil-7   | TATGACTTAGCTGTTGGATACTAATTAAGCTTAAGCAATGCCAACTCTAAGAAGTGGTAC | 2696 |
| FRI_Alc-0   | TATGACTTAGCTGTTGGATACTAATTAAGCTTAAGCAATGCCAACTCTAAGAAGTGGTAC | 2696 |
| FRI_Pu-2-23 | TATGACTTAGCTGTTGGATACTAATTAAGCTTAAGCAATGCCAACTCTAAGAAGTGGTAC | 2699 |
| FRI_NFA-10  | TATGACTTAGCTGTTGGATACTAATTAAGCTTAAGCAATGCCAACTCTAAGAAGTGGTAC | 2698 |
| FRI_Cvi-0   | TATGACTTAGCTGTTGGATACTAATTAAGCTTAAGCAATGCCAACTCTAAGAAGTGGTAC | 2699 |
| FRI_Zdr-6   | TATGACTTAGCTGTTGGATACTAATTAAGCTTAAGCAATGCCAACTCTAAGAAGTGGTAC | 2699 |

\*\*\*\*\*

|             |                                                               |      |
|-------------|---------------------------------------------------------------|------|
| FRI_An-1    | TTACACAATATTTCTATTGGTCATAGGTATAGTTGAATCAAGTATCAAGCGTGGAATGCAT | 2756 |
| FRI_Pro-0   | TTACACAATATTTCTATTGGTCATAGGTATAGTTGAATCAAGTATCAAGCGTGGAATGCAT | 2758 |
| FRI_Bâ1-2   | TTACACAATATTTCTATTGGTCATAGGTATAGTTGAATCAAGTATCAAGCGTGGAATGCAT | 2756 |
| FRI_St-0    | TTACACAATATTTCTATTGGTCATAGGTATAGTTGAATCAAGTATCAAGCGTGGAATGCAT | 2685 |
| FRI_Bg-2    | TTACACAATATTTCTATTGGTCATAGGTATAGTTGAATCAAGTATCAAGCGTGGAATGCAT | 2753 |
| FRI_C24     | TTACACAATATTTCTATTGGTCATAGGTATAGTTGAATCAAGTATCAAGCGTGGAATGCAT | 2754 |
| FRI_Van-0   | TTACACAATATTTCTATTGGTCATAGGTATAGTTGAATCAAGTATCAAGCGTGGAATGCAT | 2754 |
| FRI_Ull-2-3 | TTACACAATATTTCTATTGGTCATAGGTATAGTTGAATCAAGTATCAAGCGTGGAATGCAT | 2757 |
| FRI_Lip-0   | TTACACAATATTTCTATTGGTCATAGGTATAGTTGAATCAAGTATCAAGCGTGGAATGCAT | 2757 |
| FRI_NFA-8   | TTACACAATATTTCTATTGGTCATAGGTATAGTTGAATCAAGTATCAAGCGTGGAATGCAT | 2757 |
| FRI_Edi-0   | TTACACAATATTTCTATTGGTCATAGGTATAGTTGAATCAAGTATCAAGCGTGGAATGCAT | 2756 |
| FRI_Ren-1   | TTACACAATATTTCTATTGGTCATAGGTATAGTTGAATCAAGTATCAAGCGTGGAATGCAT | 2385 |
| FRI_Nok-3   | TTACACAATATTTCTATTGGTCATAGGTATAGTTGAATCAAGTATCAAGCGTGGAATGCAT | 2756 |
| FRI_Sha     | TTACACAATATTTCTATTGGTCATAGGTATAGTTGAATCAAGTATCAAGCGTGGAATGCAT | 2756 |
| FRI_Wa-1    | TTACACAATATTTCTATTGGTCATAGGTATAGTTGAATCAAGTATCAAGCGTGGAATGCAT | 2756 |
| FRI_Spr-1-6 | TTACACAATATTTCTATTGGTCATAGGTATAGTTGAATCAAGTATCAAGCGTGGAATGCAT | 2756 |
| FRI_Bil-7   | TTACACAATATTTCTATTGGTCATAGGTATAGTTGAATCAAGTATCAAGCGTGGAATGCAT | 2756 |
| FRI_Alc-0   | TTACACAATATTTCTATTGGTCATAGGTATAGTTGAATCAAGTATCAAGCGTGGAATGCAT | 2756 |
| FRI_Pu-2-23 | TTACACAATATTTCTATTGGTCATAGGTATAGTTGAATCAAGTATCAAGCGTGGAATGCAT | 2759 |
| FRI_NFA-10  | TTACACAATATTTCTATTGGTCATAGGTATAGTTGAATCAAGTATCAAGCGTGGAATGCAT | 2758 |
| FRI_Cvi-0   | TTACACAATATTTCTATTGGTCATAGGTATAGTTGAATCAAGTATCAAGCGTGGAATGCAT | 2759 |
| FRI_Zdr-6   | TTACACAATATTTCTATTGGTCATAGGTATAGTTGAATCAAGTATCAAGCGTGGAATGCAT | 2759 |

\*\*\*\*\*

|             |                                                               |      |
|-------------|---------------------------------------------------------------|------|
| FRI_An-1    | ATTGAAGCTCTTGAGATGGTTTATACCTTTGGCATGGAGGATAAGTTTTTCAGCTGCTCTA | 2816 |
| FRI_Pro-0   | ATTGAAGCTCTTGAGATGGTTTATACCTTTGGCATGGAGGATAAGTTTTTCAGCTGCTCTA | 2818 |
| FRI_Bâ1-2   | ATTGAAGCTCTTGAGATGGTTTATACCTTTGGCATGGAGGATAAGTTTTTCAGCTGCTCTA | 2816 |
| FRI_St-0    | ATTGAAGCTCTTGAAATGGTTTATACCTTTGGCATGGAGGATAAGTTTTTCAGCTGCTCTA | 2745 |
| FRI_Bg-2    | ATTGAAGCTCTTGAAATGGTTTATACCTTTGGCATGGAGGATAAGTTTTTCAGCTGCTCTA | 2813 |
| FRI_C24     | ATTGAAGCTCTTGAAATGGTTTATACCTTTGGCATGGAGGATAAGTTTTTCAGCTGCTCTA | 2814 |
| FRI_Van-0   | ATTGAAGCTCTTGAGATGGTTTATACCTTTGGCATGGAGGATAAGTTTTTCAGCTGCTCTA | 2814 |
| FRI_Ull-2-3 | ATTGAAGCTCTTGAGATGGTTTATACCTTTGGCATGGAGGATAAGTTTTTCAGCTGCTCTA | 2817 |
| FRI_Lip-0   | ATTGAAGCTCTTGAGATGGTTTATACCTTTGGCATGGAGGATAAGTTTTTCAGCTGCTCTA | 2817 |
| FRI_NFA-8   | ATTGAAGCTCTTGAAATGGTTTATACCTTTGGCATGGAGGATAAGTTTTTCAGCTGCTCTA | 2817 |
| FRI_Edi-0   | ATTGAAGCTCTTGAAATGGTTTATACCTTTGGCATGGAGGATAAGTTTTTCAGCTGCTCTA | 2816 |
| FRI_Ren-1   | ATTGAAGCTCTTGAAATGGTTTATACCTTTGGCATGGAGGATAAGTTTTTCAGCTGCTCTA | 2445 |
| FRI_Nok-3   | ATTGAAGCTCTTGAAATGGTTTATACCTTTGGCATGGAGGATAAGTTTTTCAGCTGCTCTA | 2816 |
| FRI_Sha     | ATTGAAGCTCTTGAGATGGTTTATACCTTTGGCATGGAGGATAAGTTTTTCAGCTGCTCTA | 2816 |
| FRI_Wa-1    | ATTGAAGCTCTTGAGATGGTTTATACCTTTGGCATGGAGGATAAGTTTTTCAGCTGCTCTA | 2816 |
| FRI_Spr-1-6 | ATTGAAGCTCTTGAGATGGTTTATACCTTTGGCATGGAGGATAAGTTTTTCAGCTGCTCTA | 2816 |
| FRI_Bil-7   | ATTGAAGCTCTTGAGATGGTTTATACCTTTGGCATGGAGGATAAGTTTTTCAGCTGCTCTA | 2816 |
| FRI_Alc-0   | ATTGAAGCTCTTGAGATGGTTTATACCTTTGGCATGGAGGATAAGTTTTTCAGCTGCTCTA | 2816 |
| FRI_Pu-2-23 | ATTGAAGCTCTTGAGATGGTTTATACCTTTGGCATGGAGGATAAGTTTTTCAGCTGCTCTA | 2819 |
| FRI_NFA-10  | ATTGAAGCTCTTGAGATGGTTTATACCTTTGGCATGGAGGATAAGTTTTTCAGCTGCTCTA | 2818 |
| FRI_Cvi-0   | ATTGAAGCTCTTGAGATGGTTTATACCTTTGGCATGGAGGATAAGTTTTTCAGCTGCTCTA | 2819 |
| FRI_Zdr-6   | ATTGAAGCTCTTGAGATGGTTTATACCTTTGGCATGGAGGATAAGTTTTTCAGCTGCTCTA | 2819 |

\*\*\*\*\*

|          |                                                              |      |
|----------|--------------------------------------------------------------|------|
| FRI_An-1 | GTTCTAACTTCATTCTTAAAGATGAGCAAGGAGTCATTTGAGAGGGCAAAACGGAAAGCC | 2876 |
|----------|--------------------------------------------------------------|------|



|             |                                                                |      |
|-------------|----------------------------------------------------------------|------|
| FRI_Pro-0   | GTTCTAACTTCATTCTTAAAGATGAGCAAGGAGTCATTTGAGAGGGCAAAAACGGAAAGCC  | 2878 |
| FRI_Bâ1-2   | GTTCTAACTTCATTCTTAAAGATGAGCAAGGAGTCATTTGAGAGGGCAAAAACGGAAAGCC  | 2876 |
| FRI_St-0    | GTTCTAACTTCATTCTTAAAGATGAGCAAGGAGTCATTTGAGAGGGCAAAAACGGAAAGCC  | 2805 |
| FRI_Bg-2    | GTTCTAACTTCATTCTTAAAGATGAGCAAGGAGTCAtTTGAGAGGGCAAAAACGGAAAGCC  | 2873 |
| FRI_C24     | GTTCTAACTTCATTCTTAAAGATGAGCAAGGAGTCATTTGAGAGGGCAAAAACGGAAAGCC  | 2874 |
| FRI_Van-0   | GTTCTAACTTCATTCTTAAAGATGAGCAAGGAGTCATTTGAGAGGGCAAAAACGGAAAGCC  | 2874 |
| FRI_Ull-2-3 | GTTCTAACTTCATTCTTAAAGATGAGCAAGGAGTCATTTGAGAGGGCAAAAACGGAAAGCC  | 2877 |
| FRI_Lip-0   | GTTCTAACTTCATTCTTAAAGATGAGCAAGGAGTCATTTGAGAGGGCAAAAACGGAAAGCC  | 2877 |
| FRI_NFA-8   | GTTCTAACTTCATTCTTAAAGATGAGCAAGGAGTCATTTGAGAGGGCAAAAACGGAAAGCC  | 2877 |
| FRI_Edi-0   | GTTCTAACTTCATTCTTAAAGATGAGCAAGGAGTCATTTGAGAGGGCAAAAACGGAAAGCC  | 2876 |
| FRI_Ren-1   | GTTCTAACTTCATTCTTAAAGATGAGCAAGGAGTCATTTGAGAGGGCAAAAACGGAAAGCC  | 2505 |
| FRI_Nok-3   | GTTCTAACTTCATTCTTAAAGATGAGCAAGGAGTCATTTGAGAGGGCAAAAACGGAAAGCC  | 2876 |
| FRI_Sha     | GTTCTAACTTCATTCTTAAAGATGAGCAAGGAGTCATTTGAGAGGGCAAAAACGGAAAGCC  | 2876 |
| FRI_Wa-1    | GTTCTAACTTCATTCTTAAAGATGAGCAAGGAGTCATTTGAGAGGGCAAAAACGGAAAGCC  | 2876 |
| FRI_Spr-1-6 | GTTCTAACTTCATTCTTAAAGATGAGCAAGGAGTCATTTGAGAGGGCAAAAACGGAAAGCC  | 2876 |
| FRI_Bil-7   | GTTCTAACTTCATTCTTAAAGATGAGCAAGGAGTCATTTGAGAGGGCAAAAACGGAAAGCC  | 2876 |
| FRI_Alc-0   | GTTCTAACTTCATTCTTAAAGATGAGCAAGGAGTCATTTGAGAGGGCAAAAACGGAAAGCC  | 2876 |
| FRI_Pu-2-23 | GTTCTAACTTCATTCTTAAAGATGAGCAAGGAAATCATTTGAGAGGGCAAAAACGGAAAGCC | 2879 |
| FRI_NFA-10  | GTTCTAACTTCATTCTTAAAGATGAGCAAGGAGTCATTTGAGAGGGCAAAAACGGAAAGCC  | 2878 |
| FRI_Cvi-0   | GTTCTAACTTCATTCTTAAAGATGAGCAAGGAGTCATTTGAGAGGGCAAAAACGGAAAGCC  | 2879 |
| FRI_Zdr-6   | GTTCTAACTTCATTCTTAAAGATGAGCAAGGAGTCATTTGAGAGGGCAAAAACGGAAAGCC  | 2879 |

\*\*\*\*\*

|             |                                                            |      |
|-------------|------------------------------------------------------------|------|
| FRI_An-1    | CAGTCACCGCTGGCATTGTATGAACCCCTCCCTTGACATTATGTACCTTTATGAACTC | 2936 |
| FRI_Pro-0   | CAGTCACCGCTGGCATTGTATGAACCCCTCCCTTGACATTATGTACCTTTATGAACTC | 2938 |
| FRI_Bâ1-2   | CAGTCACCGCTGGCATTGTATGAACCCCTCCCTTGACATTATGTACCTTTATGAACTC | 2936 |
| FRI_St-0    | CAGTCACCGCTGGCATTGTATGAACCCCTCCCTTGACATTATGTACCTTTATGAACTC | 2865 |
| FRI_Bg-2    | CAGTCACCGCTGGCATTGTATGAACCCCTCCCTTGACATTATGTACCTTTATGAACTC | 2933 |
| FRI_C24     | CAGTCACCGCTGGCATTGTATGAACCCCTCCCTTGACATTATGTACCTTTATGAACTC | 2934 |
| FRI_Van-0   | CAGTCACCGCTGGCATTGTATGAACCCCTCCCTTGACATTATGTACCTTTATGAACTC | 2934 |
| FRI_Ull-2-3 | CAGTCACCGCTG---TTGTATGAACCCCTCCCTTGACATTATGTACCTTTATGAACTC | 2933 |
| FRI_Lip-0   | CAGTCACCGCTGGCATTGTATGAACCCCTCCCTTGACATTATGTACCTTTATGAACTC | 2937 |
| FRI_NFA-8   | CAGTCACCGCTGGCATTGTATGAACCCCTCCCTTGACATTATGTACCTTTATGAACTC | 2937 |
| FRI_Edi-0   | CAGTCACCGCTGGCATTGTATGAACCCCTCCCTTGACATTATGTACCTTTATGAACTC | 2936 |
| FRI_Ren-1   | CAGTCACCGCTGGCATTGTATGAACCCCTCCCTTGACATTATGTACCTTTATGAACTC | 2565 |
| FRI_Nok-3   | CAGTCACCGCTGGCATTGTATGAACCCCTCCCTTGACATTATGTACCTTTATGAACTC | 2936 |
| FRI_Sha     | CAGTCACCGCTGGCATTGTATGAACCCCTCCCTTGACATTATGTACCTTTATGAACTC | 2936 |
| FRI_Wa-1    | CAGTCACCGCTGGCATTGTATGAACCCCTCCCTTGACATTATGTACCTTTATGAACTC | 2936 |
| FRI_Spr-1-6 | CAGTCACCGCTGGCATTGTATGAACCCCTCCCTTGACATTATGTACCTTTATGAACTC | 2936 |
| FRI_Bil-7   | CAGTCACCGCTGGCATTGTATGAACCCCTCCCTTGACATTATGTACCTTTATGAACTC | 2936 |
| FRI_Alc-0   | CAGTCACCGCTGGCATTGTATGAACCCCTCCCTTGACATTATGTACCTTTATGAACTC | 2936 |
| FRI_Pu-2-23 | CAGTCACCGCTGGCATTGTATGAACCCCTCCCTTGACATTATGTACCTTTATGAACTC | 2939 |
| FRI_NFA-10  | CAGTCACCGCTGGCATTGTATGAACCCCTCCCTTGACATTATGTACCTTTATGAACTC | 2938 |
| FRI_Cvi-0   | CAGTCACCGCTGGCATTGTATGAACCCCTCCCTTGACATTATGTACCTTTATGAACTC | 2939 |
| FRI_Zdr-6   | CAGTCACCGCTGGCATTGTATGAACCCCTCCCTTGACATTATGTACCTTTATGAACTC | 2939 |

\*\*\*\*\*

|             |                                                              |      |
|-------------|--------------------------------------------------------------|------|
| FRI_An-1    | TTTATCATCATCTGAGTCTGACCATTGATATATTTATTTCTCAACAGAAAGAAGCGGCTA | 2996 |
| FRI_Pro-0   | TTTATCATCATCTGAGTCTGACCATTGATATATTTATTTCTCAACAGAAAGAAGCGGCTA | 2998 |
| FRI_Bâ1-2   | TTTATCATCATCTGAGTCTGACCATTGATATATTTATTTCTCAACAGAAAGAAGCGGCTA | 2996 |
| FRI_St-0    | TTTATCATCATCTGAGTCTGACCATTGATATATTTATTTCTCAACAGAAAGAAGCGGCTA | 2925 |
| FRI_Bg-2    | TTTATCATCATCTGAGTCTGACCATTGATATATTTATTTCTCAACAGAAAGAAGCGGCTA | 2993 |
| FRI_C24     | TTTATCATCATCTGAGTCTGACCATTGATATATTTATTTCTCAACAGAAAGAAGCGGCTA | 2994 |
| FRI_Van-0   | TTTATCATCATCTGAGTCTGACCATTGATATATTTATTTCTCAACAGAAAGAAGCGGCTA | 2994 |
| FRI_Ull-2-3 | TTTATCATCATCTGAGTCTGACCATTGATATATTTATTTCTCAACAGAAAGAAGCGGCTA | 2993 |
| FRI_Lip-0   | TTTATCATCATCTGAGTCTGACCATTGATATATTTATTTCTCAACAGAAAGAAGCGGCTA | 2997 |
| FRI_NFA-8   | TTTATCATCATCTGAGTCTGACCATTGATATATTTATTTCTCAACAGAAAGAAGCGGCTA | 2997 |
| FRI_Edi-0   | TTTATCATCATCTGAGTCTGACCATTGATATATTTATTTCTCAACAGAAAGAAGCGGCTA | 2996 |
| FRI_Ren-1   | TTTATCATCATCTGAGTCTGACCATTGATATATTTATTTCTCAACAGAAAGAAGCGGCTA | 2625 |
| FRI_Nok-3   | TTTATCATCATCTGAGTCTGACCATTGATATATTTATTTCTCAACAGAAAGAAGCGGCTA | 2996 |
| FRI_Sha     | TTTATCATCATCTGAGTCTGACCATTGATATATTTATTTCTCAACAGAAAGAAGCGGCTA | 2996 |
| FRI_Wa-1    | TTTATCATCATCTGAGTCTGACCATTGATATATTTATTTCTCAACAGAAAGAAGCGGCTA | 2996 |
| FRI_Spr-1-6 | TTTATCATCATCTGAGTCTGACCATTGATATATTTATTTCTCAACAGAAAGAAGCGGCTA | 2996 |
| FRI_Bil-7   | TTTATCATCATCTGAGTCTGACCATTGATATATTTATTTCTCAACAGAAAGAAGCGGCTA | 2996 |
| FRI_Alc-0   | TTTATCATCATCTGAGTCTGACCATTGATATATTTATTTCTCAACAGAAAGAAGCGGCTA | 2996 |
| FRI_Pu-2-23 | TTTATCATCATCTGAGTCTGACCATTGATATATTTATTTCTCAACAGAAAGAAGCGGCTA | 2999 |
| FRI_NFA-10  | TTTATCATCATCTGAGTCTGACCATTGATATATTTATTTCTCAACAGAAAGAAGCGGCTA | 2998 |
| FRI_Cvi-0   | TTTATCATCATCTGAGTCTGACCATTGATATATTTATTTCTCAACAGAAAGAAGCGGCTA | 2999 |
| FRI_Zdr-6   | TTTATCATCATCTGAGTCTGACCATTGATATATTTATTTCTCAACAGAAAGAAGCGGCTA | 2999 |

\*\*\*\*\*

|             |                                                               |      |
|-------------|---------------------------------------------------------------|------|
| FRI_An-1    | CAAAGCAGCTAGCTGTGTTATCATCAGTTATGCAGTGTATGGAGACTCACAAAGTTAGATC | 3056 |
| FRI_Pro-0   | CAAAGCAGCTAGCTGTGTTATCATCAGTTATGCAGTGTATGGAGACTCACAAAGTTAGATC | 3058 |
| FRI_Bå1-2   | CAAAGCAGCTAGCTGTGTTATCATCAGTTATGCAGTGTATGGAGACTCACAAAGTTAGATC | 3056 |
| FRI_St-0    | CAAAGCAGCTAGCTGTGTTATCATCAGTTATGCAGTGTATGGAGACTCACAAAGTTAGATC | 2985 |
| FRI_Bg-2    | CAAAGCAGCTAGCTGTGTTATCATCAGTTATGCAGTGTATGGAGACTCACAAAGTTAGATC | 3053 |
| FRI_C24     | CAAAGCAGCTAGCTGTGTTATCATCAGTTATGCAGTGTATGGAGACTCACAAAGTTAGATC | 3054 |
| FRI_Van-0   | CAAAGCAGCTAGCTGTGTTATCATCAGTTATGCAGTGTATGGAGACTCACAAAGTTAGATC | 3054 |
| FRI_Ull-2-3 | CAAAGCAGCTAGCTGTGTTATCATCAGTTATGCAGTGTATGGAGACTCACAAAGTTAGATC | 3053 |
| FRI_Lip-0   | CAAAGCAGCTAGCTGTGTTATCATCAGTTATGCAGTGTATGGAGACTCACAAAGTTAGATC | 3057 |
| FRI_NFA-8   | CAAAGCAGCTAGCTGTGTTATCATCAGTTATGCAGTGTATGGAGACTCACAAAGTTAGATC | 3057 |
| FRI_Edi-0   | CAAAGCAGCTAGCTGTGTTATCATCAGTTATGCAGTGTATGGAGACTCACAAAGTTAGATC | 3056 |
| FRI_Ren-1   | CAAAGCAGCTAGCTGTGTTATCATCAGTTATGCAGTGTATGGAGACTCACAAAGTTAGATC | 2685 |
| FRI_Nok-3   | CAAAGCAGCTAGCTGTGTTATCATCAGTTATGCAGTGTATGGAGACTCACAAAGTTAGATC | 3056 |
| FRI_Sha     | CAAAGCAGCTAGCTGTGTTATCATCAGTTATGCAGTGTATGGAGACTCACAAAGTTAGATC | 3056 |
| FRI_Wa-1    | CAAAGCAGCTAGCTGTGTTATCATCAGTTATGCAGTGTATGGAGACTCACAAAGTTAGATC | 3056 |
| FRI_Spr-1-6 | CAAAGCAGCTAGCTGTGTTATCATCAGTTATGCAGTGTATGGAGACTCACAAAGTTAGATC | 3056 |
| FRI_Bil-7   | CAAAGCAGCTAGCTGTGTTATCATCAGTTATGCAGTGTATGGAGACTCACAAAGTTAGATC | 3056 |
| FRI_Alc-0   | CAAAGCAGCTAGCTGTGTTATCATCAGTTATGCAGTGTATGGAGACTCACAAAGTTAGATC | 3056 |
| FRI_Pu-2-23 | CAAAGCAGCTAGCTGTGTTATCATCAGTTATGCAGTGTATGGAGACTCACAAAGTTAGATC | 3059 |
| FRI_NFA-10  | CAAAGCAGCTAGCTGTGTTATCATCAGTTATGCAGTGTATGGAGACTCACAAAGTTAGATC | 3058 |
| FRI_Cvi-0   | CAAAGCAGCTAGCTGTGTTATCATCAGTTATGCAGTGTATGGAGACTCACAAAGTTAGATC | 3059 |
| FRI_Zdr-6   | CAAAGCAGCTAGCTGTGTTATCATCAGTTATGCAGTGTATGGAGACTCACAAAGTTAGATC | 3059 |

\*\*\*\*\*

|             |                                                                 |      |
|-------------|-----------------------------------------------------------------|------|
| FRI_An-1    | TTGCTTTCTCTCCATCTCTTTGTCGAGCTGA-----AGAGT----                   | 3093 |
| FRI_Pro-0   | TTGCTTTCTCTCCATCTCTTTGTCGAGCTGA-----AGAGT----                   | 3095 |
| FRI_Bå1-2   | CTGCGAAAGAAGACTACCAGGATGGCAGATCAAAGAGCAAATTTGTTAGCTTGGAGAAAGACA | 3116 |
| FRI_St-0    | CTGCGAAAGAAGACTACCAGGATGGCAGATCAAAGAGCAAATTTGTTAGCTTGGAGAAAGACA | 3045 |
| FRI_Bg-2    | CTGCGAAAGAAGACTACCAGGATGGCAGATCAAAGAGCAAATTTGTTAGCTTGGAGAAAGACA | 3113 |
| FRI_C24     | CTGCGAAAGAAGACTACCAGGATGGCAGATCAAAGAGCAAATTTGTTAGCTTGGAGAAAGACA | 3114 |
| FRI_Van-0   | CTGCGAAAGAAGACTACCAGGATGGCAGATCAAAGAGCAAATTTGTTAGCTTGGAGAAAGACA | 3114 |
| FRI_Ull-2-3 | CTGCGAAAGAAGACTACCAGGATGGCAGATCAAAGAGCAAATTTGTTAGCTTGGAGAAAGACA | 3113 |
| FRI_Lip-0   | CTGCGAAAGAAGACTACCAGGATGGCAGATCAAAGAGCAAATTTGTTAGCTTGGAGAAAGACA | 3117 |
| FRI_NFA-8   | CTGCGAAAGAAGACTACCAGGATGGCAGATCAAAGAGCAAATTTGTTAGCTTGGAGAAAGACA | 3117 |
| FRI_Edi-0   | CTGCGAAAGAAGACTACCAGGATGGCAGATCAAAGAGCAAATTTGTTAGCTTGGAGAAAGACA | 3116 |
| FRI_Ren-1   | CTGCGAAAGAAGACTACCAGGATGGCAGATCAAAGAGCAAATTTGTTAGCTTGGAGAAAGACA | 2745 |
| FRI_Nok-3   | CTGCGAAAGAAGACTACCAGGATGGCAGATCAAAGAGCAAATTTGTTAGCTTGGAGAAAGACA | 3116 |
| FRI_Sha     | CTGCGAAAGAAGACTACCAGGATGGCAGATCAAAGAGCAAATTTGTTAGCTTGGAGAAAGACA | 3116 |
| FRI_Wa-1    | CTGCGAAAGAAGACTACCAGGATGGCAGATCAAAGAGCAAATTTGTTAGCTTGGAGAAAGACA | 3116 |
| FRI_Spr-1-6 | CTGCGAAAGAAGACTACCAGGATGGCAGATCAAAGAGCAAATTTGTTAGCTTGGAGAAAGACA | 3116 |
| FRI_Bil-7   | CTGCGAAAGAAGACTACCAGGATGGCAGATCAAAGAGCAAATTTGTTAGCTTGGAGAAAGACA | 3116 |
| FRI_Alc-0   | CTGCGAAAGAAGACTACCAGGATGGCAGATCAAAGAGCAAATTTGTTAGCTTGGAGAAAGACA | 3116 |
| FRI_Pu-2-23 | CTGCGAAAGAAGACTACCAGGATGGCAGATCAAAGAGCAAATTTGTTAGCTTGGAGAAAGACA | 3119 |
| FRI_NFA-10  | CTGCGAAAGAAGACTACCAGGATGGCAGATCAAAGAGCAAATTTGTTAGCTTGGAGAAAGACA | 3118 |
| FRI_Cvi-0   | cTGCGAAAGAAGACTACCAGGATGGCAGATCAAAGAGCAAATTTGTTAGCTTGGAGAAAGACA | 3119 |
| FRI_Zdr-6   | CTGCGAAAGAAGACTACCAGGATGGCAGATCAAAGAGCAAATTTGTTAGCTTGGAGAAAGACA | 3119 |

\*\*\* \* \* \* \* \*\*\*

|             |                                                               |      |
|-------------|---------------------------------------------------------------|------|
| FRI_An-1    | -----GTCTTTCTCCAAGCTAACAATTTGCTCTCAGTTTAAATGGAGGAAG           | 3138 |
| FRI_Pro-0   | -----GTCTTTCTCCAAGCTAACAATTTGCTCTCAGTTTAAATGGAGGAAG           | 3140 |
| FRI_Bå1-2   | CTCTTCAGCTCGACAAAGAGATGGAAGAGAAAGCAAGATCTCTCAGTTTAAATGGAGGAAG | 3176 |
| FRI_St-0    | CTCTTCAGCTCGACAAAGAGATGGAAGAGAAAGCAAGATCTCTCAGTTTAAATGGAGGAAG | 3105 |
| FRI_Bg-2    | CTCTTCAGCTCGACAAAGAGATGGAAGAGAAAGCAAGATCTCTCAGTTTAAATGGAGGAAG | 3173 |
| FRI_C24     | CTCTTCAGCTCGACAAAGAGATGGAAGAGAAAGCAAGATCTCTCAGTTTAAATGGAGGAAG | 3174 |
| FRI_Van-0   | CTCTTCAGCTCGACAAAGAGATGGAAGAGAAAGCAAGATCTCTCAGTTTAAATGGAGGAAG | 3174 |
| FRI_Ull-2-3 | CTCTTCAGCTCGACAAAGAGATGGAAGAGAAAGCAAGATCTCTCAGTTTAAATGGAGGAAG | 3173 |
| FRI_Lip-0   | CTCTTCAGCTCGACAAAGAGATGGAAGAGAAAGCAAGATCTCTCAGTTTAAATGGAGGAAG | 3177 |
| FRI_NFA-8   | CTCTTCAGCTCGACAAAGAGATGGAAGAGAAAGCAAGATCTCTCAGTTTAAATGGAGGAAG | 3177 |
| FRI_Edi-0   | CTCTTCAGCTCGACAAAGAGATGGAAGAGAAAGCAAGATCTCTCAGTTTAAATGGAGGAAG | 3176 |
| FRI_Ren-1   | CTCTTCAGCTCGACAAAGAGATGGAAGAGAAAGCAAGATCTCTCAGTTTAAATGGAGGAAG | 2805 |
| FRI_Nok-3   | CTCTTCAGCTCGACAAAGAGATGGAAGAGAAAGCAAGATCTCTCAGTTTAAATGGAGGAAG | 3176 |
| FRI_Sha     | CTCTTCAGCTCGACAAAGAGATGGAAGAGAAAGCAAGATCTCTCAGTTTAAATGGAGGAAG | 3176 |
| FRI_Wa-1    | CTCTTCAGCTCGACAAAGAGATGGAAGAGAAAGCAAGATCTCTCAGTTTAAATGGAGGAAG | 3176 |
| FRI_Spr-1-6 | CTCTTCAGCTCGACAAAGAGATGGAAGAGAAAGCAAGATCTCTCAGTTTAAATGGAGGAAG | 3176 |
| FRI_Bil-7   | CTCTTCAGCTCGACAAAGAGATGGAAGAGAAAGCAAGATCTCTCAGTTTAAATGGAGGAAG | 3176 |
| FRI_Alc-0   | CTCTTCAGCTCGACAAAGAGATGGAAGAGAAAGCAAGATCTCTCAGTTTAAATGGAGGAAG | 3176 |
| FRI_Pu-2-23 | CTCTTCAGCTCGACAAAGAGATGGAAGAGAAAGCAAGATCTCTCAGTTTAAATGGAGGAAG | 3179 |
| FRI_NFA-10  | CTCTTCAGCTCGACAAAGAGATGGAAGAGAAAGCAAGATCTCTCAGTTTAAATGGAGGAAG | 3178 |
| FRI_Cvi-0   | CTCTTCAGCTCGACAAAGAGATGGAAGAGAAAGCAAGATCTCTCAGTTTAAATGGAGGAAG | 3179 |
| FRI_Zdr-6   | CTCTTCAGCTCGACAAAGAGATGGAAGAGAAAGCAAGATCTCTCAGTTTAAATGGAGGAAG | 3179 |

\* \*\* \* \*\*\*\*\*

|             |                                                                |      |
|-------------|----------------------------------------------------------------|------|
| FRI_An-1    | CCGCACTTGCCAAGAGAATGTATAACCAACAGATAAAAACGTTCCAAGGTTGTCACCCATGG | 3198 |
| FRI_Pro-0   | CCGCACTTGCCAAGAGAATGTATAACCAACAGATAAAAACGTTCCAAGGTTGTCACCCATGG | 3200 |
| FRI_Bâ1-2   | CCGCACTTGCCAAGAGAATGTATAACCAACAGATAAAAACGTTCCAAGGTTGTCACCCATGG | 3236 |
| FRI_St-0    | CCGCACTTGCCAAGAGAATGTATAACCAACAGATAAAAACGTTCCAAGGTTGTCACCCATGG | 3165 |
| FRI_Bg-2    | CCGCACTTGCCAAGAGAATGTATAACCAACAGATAAAAACGTTCCAAGGTTGTCACCCATGG | 3233 |
| FRI_C24     | CCGCACTTGCCAAGAGAATGTATAACCAACAGATAAAAACGTTCCAAGGTTGTCACCCATGG | 3234 |
| FRI_Van-0   | CCGCACTTGCCAAGAGAATGTATAACCAACAGATAAAAACGTTCCAAGGTTGTCACCCATGG | 3234 |
| FRI_U11-2-3 | CCGCACTTGCCAAGAGAATGTATAACCAACAGATAAAAACGTTCCAAGGTTGTCACCCATGG | 3233 |
| FRI_Lip-0   | CTGCACTTGCCAAGAGAATGTATAACCAACAGATAAAAACGTTCCAAGGTTGTCACCCATGG | 3237 |
| FRI_NFA-8   | CCGCACTTGCCAAGAGAATGTATAACCAACAGATAAAAACGTTCCAAGGTTGTCACCCATGG | 3237 |
| FRI_Edi-0   | CCGCACTTGCCAAGAGAATGTATAACCAACAGATAAAAACGTTCCAAGGTTGTCACCCATGG | 3236 |
| FRI_Ren-1   | CCGCACTTGCCAAGAGAATGTATAACCAACAGATAAAAACGTTCCAAGGTTGTCACCCATGG | 2865 |
| FRI_Nok-3   | CCGCACTTGCCAAGAGAATGTATAACCAACAGATAAAAACGTTCCAAGGTTGTCACCCATGG | 3236 |
| FRI_Sha     | CCGCACTTGCCAAGAGAATGTATAACCAACAGATAAAAACGTTCCAAGGTTGTCACCCATGG | 3236 |
| FRI_Wa-1    | CCGCACTTGCCAAGAGAATGTATAACCAACAGATAAAAACGTTCCAAGGTTGTCACCCATGG | 3236 |
| FRI_Spr-1-6 | CCGCACTTGCCAAGAGAATGTATAACCAACAGATAAAAACGTTCCAAGGTTGTCACCCATGG | 3236 |
| FRI_Bil-7   | CCGCACTTGCCAAGAGAATGTATAACCAACAGATAAAAACGTTCCAAGGTTGTCACCCATGG | 3236 |
| FRI_Alc-0   | CCGCACTTGCCAAGAGAATGTATAACCAACAGATAAAAACGTTCCAAGGTTGTCACCCATGG | 3236 |
| FRI_Pu-2-23 | CCGCACTTGCCAAGAGAATGTATAACCAACAGATAAAAACGTTCCAAGGTTGTCACCCATGG | 3239 |
| FRI_NFA-10  | CCGCACTTGCCAAGAGAATGTATAACCAACAGATAAAAACGTTCCAAGGTTGTCACCCATGG | 3238 |
| FRI_Cvi-0   | CCGCACTTGCCAAGAGAATGTATAACCAACAGATAAAAACGTTCCAAGGTTGTCACCCATGG | 3239 |
| FRI_Zdr-6   | CCGCACTTGCCAAGAGAATGTATAACCAACAGATAAAAACGTTCCAAGGTTGTCACCCATGG | 3239 |

\* \*\*\*\*\*

|             |                                                                |      |
|-------------|----------------------------------------------------------------|------|
| FRI_An-1    | AAATGCCACCAGTAACCTTCTTCATCGTATTCTCCTATCTACCGTGATAGAAGCTTTCCCTA | 3258 |
| FRI_Pro-0   | AAATGCCACCAGTAACCTTCTTCATCGTATTCTCCTATCTACCGTGATAGAAGCTTTCCCTA | 3260 |
| FRI_Bâ1-2   | AAATGCCACCAGTAACCTTCTTCATCGTATTCTCCTATCTACCGTGATAGAAGCTTTCCCTA | 3296 |
| FRI_St-0    | AAATGCCACCAGTAACCTTCTTCATCGTATTCTCCTATCTACCGTGATAGAAGCTTTCCCTA | 3225 |
| FRI_Bg-2    | AAATGCCACCAGTAACCTTCTTCATCGTATTCTCCTATCTACCGTGATAGAAGCTTTCCCTA | 3293 |
| FRI_C24     | AAATGCCACCAGTAACCTTCTTCATCGTATTCTCCTATCTACCGTGATAGAAGCTTTCCCTA | 3294 |
| FRI_Van-0   | AAATGCCACCAGTAACCTTCTTCATCGTATTCTCCTATCTACCGTGATAGAAGCTTTCCCTA | 3294 |
| FRI_U11-2-3 | AAATGCCACCAGTAACCTTCTTCATCGTATTCTCCTATCTACCGTGATAGAAGCTTTCCCTA | 3293 |
| FRI_Lip-0   | AAATGCCACCAGTAACCTTCTTCATCGTATTCTCCTATCTACCGTGATAGAAGCTTTCCCTA | 3297 |
| FRI_NFA-8   | AAATGCCACCAGTAACCTTCTTCATCGTATTCTCCTATCTACCGTGATAGAAGCTTTCCCTA | 3297 |
| FRI_Edi-0   | AAATGCCACCAGTAACCTTCTTCATCGTATTCTCCTATCTACCGTGATAGAAGCTTTCCCTA | 3296 |
| FRI_Ren-1   | AAATGCCACCAGTAACCTTCTTCATCGTATTCTCCTATCTACCGTGATAGAAGCTTTCCCTA | 2925 |
| FRI_Nok-3   | AAATGCCACCAGTAACCTTCTTCATCGTATTCTCCTATCTACCGTGATAGAAGCTTTCCCTA | 3296 |
| FRI_Sha     | AAATGCCACCAGTAACCTTCTTCATCGTATTCTCCTATCTACCGTGATAGAAGCTTTCCCTA | 3296 |
| FRI_Wa-1    | AAATGCCACCAGTAACCTTCTTCATCGTATTCTCCTATCTACCGTGATAGAAGCTTTCCCTA | 3296 |
| FRI_Spr-1-6 | AAATGCCACCAGTAACCTTCTTCATCGTATTCTCCTATCTACCGTGATAGAAGCTTTCCCTA | 3296 |
| FRI_Bil-7   | AAATGCCACCAGTAACCTTCTTCATCGTATTCTCCTATCTACCGTGATAGAAGCTTTCCCTA | 3296 |
| FRI_Alc-0   | AAATGCCACCAGTAACCTTCTTCATCGTATTCTCCTATCTACCGTGATAGAAGCTTTCCCTA | 3296 |
| FRI_Pu-2-23 | AAATGCCACCAGTAACCTTCTTCATCGTATTCTCCTATCTACCGTGATAGAAGCTTTCCCTA | 3299 |
| FRI_NFA-10  | AAATGCCACCAGTAACCTTCTTCATCGTATTCTCCTATCTACCGTGATAGAAGCTTTCCCTA | 3298 |
| FRI_Cvi-0   | AAATGCCACCAGTAACCTTCTTCATCGTATTCTCCTATCTACCGTGATAGAAGCTTTCCCTA | 3299 |
| FRI_Zdr-6   | AAATGCCACCAGTAACCTTCTTCATCGTATTCTCCTATCTACCGTGATAGAAGCTTTCCCTA | 3299 |

\*\*\*\*\*

|             |                                                              |      |
|-------------|--------------------------------------------------------------|------|
| FRI_An-1    | GTCAAAGAGACGATGACCAAGATGAA-ATATCAGCTCTTGTGAGTAGTTACCTCGGCCCG | 3317 |
| FRI_Pro-0   | GTCAAAGAGACGATGACCAAGATGAA-ATATCAGCTCTTGTGAGTAGTTACCTCGGCCCG | 3319 |
| FRI_Bâ1-2   | GTCAAAGAGACGATGACCAAGATGAA-ATATCAGCTCTTGTGAGTAGTTACCTCGGCCCG | 3355 |
| FRI_St-0    | GTCAAAGAGACGATGACCAAGATGAA-ATATCAGCTCTTGTGAGTAGTTACCTCGGCCCG | 3284 |
| FRI_Bg-2    | GTCAAAGAGACGATGACCAAGATGAA-ATATCAGCTCTTGTGAGTAGTTACCTCGGCCCG | 3352 |
| FRI_C24     | GTCAAAGAGACGATGACCAAGATGAA-ATATCAGCTCTTGTGAGTAGTTACCTCGGCCCG | 3353 |
| FRI_Van-0   | GTCAAAGAGACGATGACCAAGATGAA-ATATCAGCTCTTGTGAGTAGTTACCTCGGCCCG | 3353 |
| FRI_U11-2-3 | GTCAAAGAGACGATGACCAAGATGAA-ATATCAGCTCTTGTGAGTAGTTACCTCGGCCCG | 3352 |
| FRI_Lip-0   | GTCAAAGAGACGATGACCAAGATGAA-ATATCAGCTCTTGTGAGTAGTTACCTCGGCCCG | 3356 |
| FRI_NFA-8   | GTCAAAGAGACGATGACCAAGATGAA-ATATCAGCTCTTGTGAGTAGTTACCTCGGCCCG | 3356 |
| FRI_Edi-0   | GTCAAAGAGACGATGACCAAGATGAA-ATATCAGCTCTTGTGAGTAGTTACCTCGGCCCG | 3355 |
| FRI_Ren-1   | GTCAAAGAGACGATGACCAAGATGAA-ATATCAGCTCTTGTGAGTAGTTACCTCGGCCCG | 2984 |
| FRI_Nok-3   | GTCAAAGAGACGATGACCAAGATGAA-ATATCAGCTCTTGTGAGTAGTTACCTCGGCCCG | 3355 |
| FRI_Sha     | GTCAAAGAGACGATGACCAAGATGAA-ATATCAGCTCTTGTGAGTAGTTACCTCGGCCCG | 3355 |
| FRI_Wa-1    | GTCAAAGAGACGATGACCAAGATGAA-ATATCAGCTCTTGTGAGTAGTTACCTCGGCCCG | 3355 |
| FRI_Spr-1-6 | GTCAAAGAGACGATGACCAAGATGAA-ATATCAGCTCTTGTGAGTAGTTACCTCGGCCCG | 3355 |
| FRI_Bil-7   | GTCAAAGAGACGATGACCAAGATGAA-ATATCAGCTCTTGTGAGTAGTTACCTCGGCCCG | 3355 |
| FRI_Alc-0   | GTCAAAGAGACGATGACCAAGATGAA-ATATCAGCTCTTGTGAGTAGTTACCTCGGCCCG | 3355 |
| FRI_Pu-2-23 | GTCAAAGAGACGATGACCAAGATGAA-ATATCAGCTCTTGTGAGTAGTTACCTCGGCCCG | 3358 |
| FRI_NFA-10  | GTCAAAGAGACGATGACCAAGATGAA-ATATCAGCTCTTGTGAGTAGTTACCTCGGCCCG | 3358 |
| FRI_Cvi-0   | GTCAAAGAGACGATGACCAAGATGAA-ATATCAGCTCTTGTGAGTAGTTACCTCGGCCCG | 3358 |
| FRI_Zdr-6   | GTCAAAGAGACGATGACCAAGATGAA-ATATCAGCTCTTGTGAGTAGTTACCTCGGCCCG | 3358 |



|             |                                                                      |      |
|-------------|----------------------------------------------------------------------|------|
| FRI_Zdr-6   | GGTCACGGACATAGACTTCATCGACAGTACTCTCCGTCTTTGGTTACGGACAGAGACAT<br>***** | 3538 |
| FRI_An-1    | CCACTACAGTACTCTCTCCAATTCATGGACAACAACAGTTACCATATGGTATACAAAGG          | 3557 |
| FRI_Pro-0   | CCACTACAGTACTCTCTCCAATTCATGGACAACAACAGTTACCATATGGTATACAAAGG          | 3559 |
| FRI_Bâ1-2   | CCACTACAGTACTCTCTCCAATTCATGGACAACAACAGTTACCATATGGTATACAAAGG          | 3595 |
| FRI_St-0    | CCACTACAGTACTCTCTCCAATTCATGGACAACAACAGTTACCATATGGTATACAAAGG          | 3524 |
| FRI_Bg-2    | CCACTACAGTACTCTCTCCAATTCATGGACAACAACAGTTACCATATGGTATACAAAGG          | 3592 |
| FRI_C24     | CCACTACAGTACTCTCTCCAATTCATGGACAACAACAGTTACCATATGGTATACAAAGG          | 3593 |
| FRI_Van-0   | CCACTACAGTACTCTCTCCAATTCATGGACAACAACAGTTACCATATGGTATACAAAGG          | 3593 |
| FRI_U11-2-3 | CCACTACAGTACTCTCTCCAATTCATGGACAACAACAGTTACCATATGGTATACAAAGG          | 3592 |
| FRI_Lip-0   | CCACTACAGTACTCTCTCCAATTCATGGACAACAACAGTTACCATATGGTATACAAAGG          | 3596 |
| FRI_NFA-8   | CCACTACAGTACTCTCTCCAATTCATGGACAACAACAGTTACCATATGGTATACAAAGG          | 3596 |
| FRI_Edi-0   | CCACTACAGTACTCTCTCCAATTCATGGACAACAACAGTTACCATATGGTATACAAAGG          | 3595 |
| FRI_Ren-1   | CCACTACAGTACTCTCTCCAATTCATGGACAACAACAGTTACCATATGGTATACAAAGG          | 3224 |
| FRI_Nok-3   | CCACTACAGTACTCTCTCCAATTCATGGACAACAACAGTTACCATATGGTATACAAAGG          | 3595 |
| FRI_Sha     | CCACTACAGTACTCTCTCCAATTCATGGACAACAACAGTTACCATATGGTATACAAAGG          | 3595 |
| FRI_Wa-1    | CCACTACAGTACTCTCTCCAATTCATGGACAACAACAGTTACCATATGGTATACAAAGG          | 3595 |
| FRI_Spr-1-6 | CCACTACAGTACTCTCTCCAATTCATGGACAACAACAGTTACCATATGGTATACAAAGG          | 3595 |
| FRI_Bil-7   | CCACTACAGTACTCTCTCCAATTCATGGACAACAACAGTTACCATATGGTATACAAAGG          | 3595 |
| FRI_Alc-0   | CCACTACAGTACTCTCTCCAATTCATGGACAACAACAGTTACCATATGGTATACAAAGG          | 3595 |
| FRI_Pu-2-23 | CCACTACAGTACTCTCTCCAATTCATGGACAACAACAGTTACCATATGGTATACAAAGG          | 3598 |
| FRI_NFA-10  | CCACTACAGTACTCTCTCCAATTCATGGACAACAACAGTTACCATATGGTATACAAAGG          | 3598 |
| FRI_Cvi-0   | CCACTACAGTACTCTCTCCAATTCATGGACAACAACAGTTACCATATGGTATACAAAGG          | 3598 |
| FRI_Zdr-6   | CCACTACAGTACTCTCTCCAATTCATGGACAACAACAGTTACCATATGGTATACAAAGG<br>***** | 3598 |
| FRI_An-1    | GTTTACAGACATTACCATCTGAAGAAAGATATTTGGGTTTATCCAATCAAAGGTCTCCT          | 3617 |
| FRI_Pro-0   | GTTTACAGACATTACCATCTGAAGAAAGATATTTGGGTTTATCCAATCAAAGGTCTCCT          | 3619 |
| FRI_Bâ1-2   | GTTTACAGACATTACCATCTGAAGAAAGATATTTGGGTTTATCCAATCAAAGGTCTCCT          | 3655 |
| FRI_St-0    | GTTTACAGACATTACCATCTGAAGAAAGATATTTGGGTTTATCCAATCAAAGGTCTCCT          | 3584 |
| FRI_Bg-2    | GTTTACAGACATTACCATCTGAAGAAAGATATTTGGGTTTATCCAATCAAAGGTCTCCT          | 3652 |
| FRI_C24     | GTTTACAGACATTACCATCTGAAGAAAGATATTTGGGTTTATCCAATCAAAGGTCTCCT          | 3653 |
| FRI_Van-0   | GTTTACAGACATTACCATCTGAAGAAAGATATTTGGGTTTATCCAATCAAAGGTCTCCT          | 3653 |
| FRI_U11-2-3 | GTTTACAGACATTACCATCTGAAGAAAGATATTTGGGTTTATCCAATCAAAGGTCTCCT          | 3652 |
| FRI_Lip-0   | GTTTACAGACATTACCATCTGAAGAAAGATATTTGGGTTTATCCAATCAAAGGTCTCCT          | 3656 |
| FRI_NFA-8   | GTTTACAGACATTACCATCTGAAGAAAGATATTTGGGTTTATCCAATCAAAGGTCTCCT          | 3656 |
| FRI_Edi-0   | GTTTACAGACATTACCATCTGAAGAAAGATATTTGGGTTTATCCAATCAAAGGTCTCCT          | 3655 |
| FRI_Ren-1   | GTTTACAGACATTACCATCTGAAGAAAGATATTTGGGTTTATCCAATCAAAGGTCTCCT          | 3284 |
| FRI_Nok-3   | GTTTACAGACATTACCATCTGAAGAAAGATATTTGGGTTTATCCAATCAAAGGTCTCCT          | 3655 |
| FRI_Sha     | GTTTACAGACATTACCATCTGAAGAAAGATATTTGGGTTTATCCAATCAAAGGTCTCCT          | 3655 |
| FRI_Wa-1    | GTTTACAGACATTACCATCTGAAGAAAGATATTTGGGTTTATCCAATCAAAGGTCTCCT          | 3655 |
| FRI_Spr-1-6 | GTTTACAGACATTACCATCTGAAGAAAGATATTTGGGTTTATCCAATCAAAGGTCTCCT          | 3655 |
| FRI_Bil-7   | GTTTACAGACATTACCATCTGAAGAAAGATATTTGGGTTTATCCAATCAAAGGTCTCCT          | 3655 |
| FRI_Alc-0   | GTTTACAGACATTACCATCTGAAGAAAGATATTTGGGTTTATCCAATCAAAGGTCTCCT          | 3655 |
| FRI_Pu-2-23 | GTTTACAGACATTACCATCTGAAGAAAGATATTTGGGTTTATCCAATCAAAGGTCTCCT          | 3658 |
| FRI_NFA-10  | GTTTACAGACATTACCATCTGAAGAAAGATATTTGGGTTTATCCAATCAAAGGTCTCCT          | 3658 |
| FRI_Cvi-0   | GTTTACAGACATTACCATCTGAAGAAAGATATTTGGGTTTATCCAATCAAAGGTCTCCT          | 3658 |
| FRI_Zdr-6   | GTTTACAGACATTACCATCTGAAGAAAGATATTTGGGTTTATCCAATCAAAGGTCTCCT<br>***** | 3658 |
| FRI_An-1    | CGCAGTAACTCATCATTAGACCCCAAATAGGAGGAATGTAATTTGTAACAAGGCTTTTT          | 3677 |
| FRI_Pro-0   | CGCAGTAACTCATCATTAGACCCCAAATAGGAGGAATGTAATTTGTAACAAGGCTTTTT          | 3679 |
| FRI_Bâ1-2   | CGCAGTAACTCATCATTAGACCCCAAATAGGAGGAATGTAATTTGTAACAAGGCTTTTT          | 3715 |
| FRI_St-0    | CGCAGTAACTCATCATTAGACCCCAAATAGGAGGAATGTAATTTGTAACAAGGCTTTTT          | 3644 |
| FRI_Bg-2    | CGCAGTAACTCATCATTAGACCCCAAATAGGAGGAATGTAATTTGTAACAAGGCTTTTT          | 3712 |
| FRI_C24     | CGCAGTAACTCATCATTAGACCCCAAATAGGAGGAATGTAATTTGTAACAAGGCTTTTT          | 3713 |
| FRI_Van-0   | CGCAGTAACTCATCATTAGACCCCAAATAGGAGGAATGTAATTTGTAACAAGGCTTTTT          | 3713 |
| FRI_U11-2-3 | CGCAGTAACTCATCATTAGACCCCAAATAGGAGGAATGTAATTTGTAACAAGGCTTTTT          | 3712 |
| FRI_Lip-0   | CGCAGTAACTCATCATTAGACCCCAAATAGGAGGAATGTAATTTGTAACAAGGCTTTTT          | 3716 |
| FRI_NFA-8   | CGCAGTAACTCATCATTAGACCCCAAATAGGAGGAATGTAATTTGTAACAAGGCTTTTT          | 3716 |
| FRI_Edi-0   | CGCAGTAACTCATCATTAGACCCCAAATAGGAGGAATGTAATTTGTAACAAGGCTTTTT          | 3715 |
| FRI_Ren-1   | CGCAGTAACTCATCATTAGACCCCAAATAGGAGGAATGTAATTTGTAACAAGGCTTTTT          | 3344 |
| FRI_Nok-3   | CGCAGTAACTCATCATTAGACCCCAAATAGGAGGAATGTAATTTGTAACAAGGCTTTTT          | 3715 |
| FRI_Sha     | CGCAGTAACTCATCATTAGACCCCAAATAGGAGGAATGTAATTTGTAACAAGGCTTTTT          | 3715 |
| FRI_Wa-1    | CGCAGTAACTCATCATTAGACCCCAAATAGGAGGAATGTAATTTGTAACAAGGCTTTTT          | 3715 |
| FRI_Spr-1-6 | CGCAGTAACTCATCATTAGACCCCAAATAGGAGGAATGTAATTTGTAACAAGGCTTTTT          | 3715 |
| FRI_Bil-7   | CGCAGTAACTCATCATTAGACCCCAAATAGGAGGAATGTAATTTGTAACAAGGCTTTTT          | 3715 |
| FRI_Alc-0   | CGCAGTAACTCATCATTAGACCCCAAATAGGAGGAATGTAATTTGTAACAAGGCTTTTT          | 3715 |
| FRI_Pu-2-23 | CGCAGTAACTCATCATTAGACCCCAAATAGGAGGAATGTAATTTGTAACAAGGCTTTTT          | 3718 |
| FRI_NFA-10  | CGCAGTAACTCATCATTAGACCCCAAATAGGAGGAATGTAATTTGTAACAAGGCTTTTT          | 3718 |

|             |                                                                       |      |
|-------------|-----------------------------------------------------------------------|------|
| FRI_Cvi-0   | CGCAGTAACTCATCTAGACCCCAATAGGAGGAATGTAAATTTGTAACAAAGCTTTTT             | 3718 |
| FRI_Zdr-6   | CGCAGTAACTCATCTAGACCCCAATAGGAGGAATGTAAATTTGTAACAAAGCTTTTT<br>*****    | 3718 |
| FRI_An-1    | GTTTTTGCTTAAGTTAGTCATTTATTTAACTCCCAACAGTCTCAAATTTAATTTAATGT           | 3737 |
| FRI_Pro-0   | GTTTTTGCTTAAGTTAGTCATTTATTTAACTCCCAACAGTCTCAAATTTAATTTAATGT           | 3739 |
| FRI_Bå1-2   | GTTTTTGCTTAAGTTAGTCATTTATTTAACTCCCAACAGTCTCAAATTTAATTTAATGT           | 3775 |
| FRI_St-0    | GTTTTTGCTTAAGTTAGTCATTTATTTAACTCCCAACAGTCTCAAATTTAATTTAATGT           | 3704 |
| FRI_Bg-2    | GTTTTTGCTTAAGTTAGTCATTTATTTAACTCCCAACAGTCTCAAATTTAATTTAATGT           | 3772 |
| FRI_C24     | GTTTTTGCTTAAGTTAGTCATTTATTTAACTCCCAACAGTCTCAAATTTAATTTAATGT           | 3773 |
| FRI_Van-0   | GTTTTTGCTTAAGTTAGTCATTTATTTAACTCCCAACAGTCTCAAATTTAATTTAATGT           | 3773 |
| FRI_U11-2-3 | GTTTTTGCTTAAGTTAGTCATTTATTTAACTCCCAACAGTCTCAAATTTAATTTAATGT           | 3772 |
| FRI_Lip-0   | GTTTTTGCTTAAGTTAGTCATTTATTTAACTCCCAACAGTCTCAAATTTAATTTAATGT           | 3776 |
| FRI_NFA-8   | GTTTTTGCTTAAGTTAGTCATTTATTTAACTCCCAACAGTCTCAAATTTAATTTAATGT           | 3776 |
| FRI_Edi-0   | GTTTTTGCTTAAGTTAGTCATTTATTTAACTCCCAACAGTCTCAAATTTAATTTAATGT           | 3775 |
| FRI_Ren-1   | GTTTTTGCTTAAGTTAGTCATTTATTTAACTCCCAACAGTCTCAAATTTAATTTAATGT           | 3404 |
| FRI_Nok-3   | GTTTTTGCTTAAGTTAGTCATTTATTTAACTCCCAACAGTCTCAAATTTAATTTAATGT           | 3775 |
| FRI_Sha     | GTTTTTGCTTAAGTTAGTCATTTATTTAACTCCCAACAGTCTCAAATTTAATTTAATGT           | 3775 |
| FRI_Wa-1    | GTTTTTGCTTAAGTTAGTCATTTATTTAACTCCCAACAGTCTCAAATTTAATTTAATGT           | 3775 |
| FRI_Spr-1-6 | GTTTTTGCTTAAGTTAGTCATTTATTTAACTCCCAACAGTCTCAAATTTAATTTAATGT           | 3775 |
| FRI_Bil-7   | GTTTTTGCTTAAGTTAGTCATTTATTTAACTCCCAACAGTCTCAAATTTAATTTAATGT           | 3775 |
| FRI_Alc-0   | GTTTTTGCTTAAGTTAGTCATTTATTTAACTCCCAACAGTCTCAAATTTAATTTAATGT           | 3775 |
| FRI_Pu-2-23 | GTTTTTGCTTAAGTTAGTCATTTATTTAACTCCCAACAGTCTCAAATTTAATTTAATGT           | 3778 |
| FRI_NFA-10  | GTTTTTGCTTAAGTTAGTCATTTATTTAACTCCCAACAGTCTCAAATTTAATTTAATGT           | 3778 |
| FRI_Cvi-0   | GTTTTTGCTTAAGTTAGTCATTTATTTAACTCCCAACAGTCTCAAATTTAATTTAATGT           | 3778 |
| FRI_Zdr-6   | GTTTTTGCTTAAGTTAGTCATTTATTTAACTCCCAACAGTCTCAAATTTAATTTAATGT<br>*****  | 3778 |
| FRI_An-1    | TTGGGGCTTAAGAATGCAAATTTTTTTGCTCCTGTAATTGACATTTAAGATGCTAATGTT          | 3797 |
| FRI_Pro-0   | TTGGGGCTTAAGAATGCAAATTTTTTTGCTCCTGTAATTGACATTTAAGATGCTAATGTT          | 3799 |
| FRI_Bå1-2   | TTGGGGCTTAAGAATGCAAATTTTTTTGCTCCTGTAATTGACATTTAAGATGCTAATGTT          | 3835 |
| FRI_St-0    | TTGGGGCTTAAGAATGCAAATTTTTTTGCTCCTGTAATTGACATTTAAGATGCTAATGTT          | 3764 |
| FRI_Bg-2    | TTGGGGCTTAAGAATGCAAATTTTTTTGCTCCTGTAATTGACATTTAAGATGCTAATGTT          | 3832 |
| FRI_C24     | TTGGGGCTTAAGAATGCAAATTTTTTTGCTCCTGTAATTGACATTTAAGATGCTAATGTT          | 3833 |
| FRI_Van-0   | TTGGGGCTTAAGAATGCAAATTTTTTTGCTCCTGTAATTGACATTTAAGATGCTAATGTT          | 3833 |
| FRI_U11-2-3 | TTGGGGCTTAAGAATGCAAATTTTTTTGCTCCTGTAATTGACATTTAAGATGCTAATGTT          | 3832 |
| FRI_Lip-0   | TTGGGGCTTAAGAATGCAAATTTTTTTGCTCCTGTAATTGACATTTAAGATGCTAATGTT          | 3836 |
| FRI_NFA-8   | TTGGGGCTTAAGAATGCAAATTTTTTTGCTCCTGTAATTGACATTTAAGATGCTAATGTT          | 3836 |
| FRI_Edi-0   | TTGGGGCTTAAGAATGCAAATTTTTTTGCTCCTGTAATTGACATTTAAGATGCTAATGTT          | 3835 |
| FRI_Ren-1   | TTGGGGCTTAAGAATGCAAATTTTTTTGCTCCTGTAATTGACATTTAAGATGCTAATGTT          | 3464 |
| FRI_Nok-3   | TTGGGGCTTAAGAATGCAAATTTTTTTGCTCCTGTAATTGACATTTAAGATGCTAATGTT          | 3835 |
| FRI_Sha     | TTGGGGCTTAAGAATGCAAATTTTTTTGCTCCTGTAATTGACATTTAAGATGCTAATGTT          | 3835 |
| FRI_Wa-1    | TTGGGGCTTAAGAATGCAAATTTTTTTGCTCCTGTAATTGACATTTAAGATGCTAATGTT          | 3835 |
| FRI_Spr-1-6 | TTGGGGCTTAAGAATGCAAATTTTTTTGCTCCTGTAATTGACATTTAAGATGCTAATGTT          | 3835 |
| FRI_Bil-7   | TTGGGGCTTAAGAATGCAAATTTTTTTGCTCCTGTAATTGACATTTAAGATGCTAATGTT          | 3835 |
| FRI_Alc-0   | TTGGGGCTTAAGAATGCAAATTTTTTTGCTCCTGTAATTGACATTTAAGATGCTAATGTT          | 3835 |
| FRI_Pu-2-23 | TTGGGGCTTAAGAATGCAAATTTTTTTGCTCCTGTAATTGACATTTAAGATGCTAATGTT          | 3838 |
| FRI_NFA-10  | TTGGGGCTTAAGAATGCAAATTTTTTTGCTCCTGTAATTGACATTTAAGATGCTAATGTT          | 3838 |
| FRI_Cvi-0   | TTGGGGCTTAAGAATGCAAATTTTTTTGCTCCTGTAATTGACATTTAAGATGCTAATGTT          | 3838 |
| FRI_Zdr-6   | TTGGGGCTTAAGAATGCAAATTTTTTTGCTCCTGTAATTGACATTTAAGATGCTAATGTT<br>***** | 3838 |
| FRI_An-1    | ATTGCTTCAGAGGTTTTAGTCAACCTCAGATACATCGATATCACTATCTAAATAGACCTC          | 3857 |
| FRI_Pro-0   | ATTGCTTCAGAGGTTTTAGTCAACCTCAGATACATCGATATCACTATCTAAATAGACCTC          | 3859 |
| FRI_Bå1-2   | ATTGCTTCAGAGGTTTTAGTCAACCTCAGATACATCGATATCACTATCTAAATAGACCTC          | 3895 |
| FRI_St-0    | ATTGCTTCAGAGGTTTTAGTCAACCTCAGATACATCGATATCACTATCTAAATAGACCTC          | 3824 |
| FRI_Bg-2    | ATTGCTTCAGAGGTTTTAGTCAACCTCAGATACATCGATATCACTATCTAAATAGACCTC          | 3892 |
| FRI_C24     | ATTGCTTCAGAGGTTTTAGTCAACCTCAGATACATCGATATCACTATCTAAATAGACCTC          | 3893 |
| FRI_Van-0   | ATTGCTTCAGAGGTTTTAGTCAACCTCAGATACATCGATATCACTATCTAAATAGACCTC          | 3893 |
| FRI_U11-2-3 | ATTGCTTCAGAGGTTTTAGTCAACCTCAGATACATCGATATCACTATCTAAATAGACCTC          | 3892 |
| FRI_Lip-0   | ATTGCTTCAGAGGTTTTAGTCAACCTCAGATACATCGATATCACTATCTAAATAGACCTC          | 3896 |
| FRI_NFA-8   | ATTGCTTCAGAGGTTTTAGTCAACCTCAGATACATCGATATCACTATCTAAATAGACCTC          | 3896 |
| FRI_Edi-0   | ATTGCTTCAGAGGTTTTAGTCAACCTCAGATACATCGATATCACTATCTAAATAGACCTC          | 3895 |
| FRI_Ren-1   | ATTGCTTCAGAGGTTTTAGTCAACCTCAGATACATCGATATCACTATCTAAATAGACCTC          | 3524 |
| FRI_Nok-3   | ATTGCTTCAGAGGTTTTAGTCAACCTCAGATACATCGATATCACTATCTAAATAGACCTC          | 3895 |
| FRI_Sha     | ATTGCTTCAGAGGTTTTAGTCAACCTCAGATACATCGATATCACTATCTAAATAGACCTC          | 3895 |
| FRI_Wa-1    | ATTGCTTCAGAGGTTTTAGTCAACCTCAGATACATCGATATCACTATCTAAATAGACCTC          | 3895 |
| FRI_Spr-1-6 | ATTGCTTCAGAGGTTTTAGTCAACCTCAGATACATCGATATCACTATCTAAATAGACCTC          | 3895 |
| FRI_Bil-7   | ATTGCTTCAGAGGTTTTAGTCAACCTCAGATACATCGATATCACTATCTAAATAGACCTC          | 3895 |
| FRI_Alc-0   | ATTGCTTCAGAGGTTTTAGTCAACCTCAGATACATCGATATCACTATCTAAATAGACCTC          | 3895 |
| FRI_Pu-2-23 | ATTGCTTCAGAGGTTTTAGTCAACCTCAGATACATCGATATCACTATCTAAATAGACCTC          | 3898 |

FRI\_NFA-10 ATTGCTTCAGAGGTTTTAGTCAACCTCAGATACATCGATATCACTATCTAAATAGACCTC 3898  
FRI\_Cvi-0 ATTGCTTCAGAGGTTTTAGTCAACCTCAGATACATCGATATCACTATCTAAATAGACCTC 3898  
FRI\_Zdr-6 ATTGCTTCAGAGGTTTTAGTCAACCTCAGATACATCGATATCACTATCTAAATAGACCTC 3898  
\*\*\*\*\* \*

FRI\_An-1 TGGCTCTTGGTCATC-T--GGATTCTCTTCATCTTCTGT-CTCTGTTC----CTTCTTGT 3909  
FRI\_Pro-0 TGGCTCTTGGTCATC-T--GGATTCTCTTCATCTTCTGT-CTCTGTTC----CTTCTTGT 3911  
FRI\_Bål-2 CTGGCTCTTGGGTCATCTGGGATTCTCTTCATCCTCTGGTCTCGGTTCTTCTTGGTTCT 3955  
FRI\_St-0 TG-GCTCTTGGTCATCT--GGATTCTCTTCATCTTCTGT-CTCTGTTCCTTCTTGTCT- 3879  
FRI\_Bg-2 TG-GCTCTTGGTCATCT--GGATTCTCTTCATCTTCTGT-CTCTGTTCCTTCTTGTCT- 3947  
FRI\_C24 TG-GCTCTTGGTCATCT--GGATTCTCTTCATCTTCTGT-CTCTGTTCCTTCTTGTCT- 3948  
FRI\_Van-0 TG-GCTCTTGGTCATCT--GGATTCTCTTCATCTTCTGT-CTCTGTTCCTTCTTGTCT- 3948  
FRI\_Ull-2-3 TG-GCTCTTGGTCATCT--GGATTCTCTTCATCTTCTGT-CTCTGTTCCTTCTTGTCT- 3947  
FRI\_Lip-0 TG-GCTCTTGGTCATCT--GGATTCTCTTCATCTTCTGT-CTCTGTTCCTTCTTGTCT- 3951  
FRI\_NFA-8 TG-GCTCTTGGTCATCT--GGATTCTCTTCATCTTCTGT-CTCTGTTCCTTCTTGTCT- 3951  
FRI\_Edi-0 TG-GCTCTTGGTCATCT--GGATTCTCTTCATCTTCTGT-CTCTGTTCCTTCTTGTCT- 3950  
FRI\_Ren-1 TG-GCTCTTGGTCATCT--GGATTCTCTTCATCTTCTGT-CTCTGTTCCTTCTTGTCT- 3579  
FRI\_Nok-3 TG-GCTCTTGGTCATCT--GGATTCTCTTCATCTTCTGT-CTCTGTTCCTTCTTGTCT- 3950  
FRI\_Sha TG-GCTCTTGGTCATCT--GGATTCTCTTCATCTTCTGT-CTCTGTTCCTTCTTGTCT- 3950  
FRI\_Wa-1 TG-GCTCTTGGTCATCT--GGATTCTCTTCATCTTCTGT-CTCTGTTCCTTCTTGTCT- 3950  
FRI\_Spr-1-6 TG-GCTCTTGGTCATCT--GGATTCTCTTCATCTTCTGT-CTCTGTTCCTTCTTGTCT- 3950  
FRI\_Bil-7 TG-GCTCTTGGTCATCT--GGATTCTCTTCATCTTCTGT-CTCTGTTCCTTCTTGTCT- 3950  
FRI\_Alc-0 TG-GCTCTTGGTCATCT--GGATTCTCTTCATCTTCTGT-CTCTGTTCCTTCTTGTCT- 3950  
FRI\_Pu-2-23 TG-GCTCTTGGTCATCT--GGATTCTCTTCATCTTCTGT-CTCTGTTCCTTCTTGTCT- 3953  
FRI\_NFA-10 TG-GCTCTTGGTCATCT--GGATTCTCTTCATCTTCTGT-CTCTGTTCCTTCTTGTCT- 3953  
FRI\_Cvi-0 TG-GCTCTTGGTCATCT--GGATTCTCTTCATCTTCTGT-CTCTGTTCCTTCTTGTCT- 3953  
FRI\_Zdr-6 TG-GCTCTTGGTCATCT--GGATTCTCTTCATCTTCTGT-CTCTGTTCCTTCTTGTCT- 3953  
\* \* \* \* \* \* \* \* \* \* \* \* \* \* \* \* \* \*

FRI\_An-1 TCTCGTTGCACTGCTCGAGCAATTGCGGATTCACACCTTGTGCTTACAGTTTCCCATGAC 3969  
FRI\_Pro-0 TCTCGTTGCACTGCTCGAGCAATTGCGGATTCACACCTTGTGCTTACAGTTTCCCATGAC 3971  
FRI\_Bål-2 CTGTGCACTGCTCGAGCAATTGCGGATTCACACCTTGTGCTTACAGTTTCCCATGAC 3986  
FRI\_St-0 CGTTGCACTG---CTCGAGCAATTGCGGATTCACACCTTGTGCTTACAGTTTCCCATGAC 3936  
FRI\_Bg-2 CGTTGCACTG---CTCGAGCAATTGCGGATTCACACCTTGTGCTTACAGTTTCCCATGAC 4004  
FRI\_C24 CGTTGCACTG---CTCGAGCAATTGCGGATTCACACCTTGTGCTTACAGTTTCCCATGAC 4005  
FRI\_Van-0 CGTTGCACTG---CTCGAGCAATTGCGGATTCACACCTTGTGCTTACAGTTTCCCATGAC 4005  
FRI\_Ull-2-3 CGTTGCACTG---CTCGAGCAATTGCGGATTCACACCTTGTGCTTACAGTTTCCCATGAC 4004  
FRI\_Lip-0 CGTTGCACTG---CTCGAGCAATTGCGGATTCACACCTTGTGCTTACAGTTTCCCATGAC 4008  
FRI\_NFA-8 CGTTGCACTG---CTCGAGCAATTGCGGATTCACACCTTGTGCTTACAGTTTCCCATGAC 4008  
FRI\_Edi-0 CGTTGCACTG---CTCGAGCAATTGCGGATTCACACCTTGTGCTTACAGTTTCCCATGAC 4007  
FRI\_Ren-1 CGTTGCACTG---CTCGAGCAATTGCGGATTCACACCTTGTGCTTACAGTTTCCCATGAC 3636  
FRI\_Nok-3 CGTTGCACTG---CTCGAGCAATTGCGGATTCACACCTTGTGCTTACAGTTTCCCATGAC 4007  
FRI\_Sha CGTTGCACTG---CTCGAGCAATTGCGGATTCACACCTTGTGCTTACAGTTTCCCATGAC 4007  
FRI\_Wa-1 CGTTGCACTG---CTCGAGCAATTGCGGATTCACACCTTGTGCTTACAGTTTCCCATGAC 4007  
FRI\_Spr-1-6 CGTTGCACTG---CTCGAGCAATTGCGGATTCACACCTTGTGCTTACAGTTTCCCATGAC 4007  
FRI\_Bil-7 CGTTGCACTG---CTCGAGCAATTGCGGATTCACACCTTGTGCTTACAGTTTCCCATGAC 4007  
FRI\_Alc-0 CGTTGCACTG---CTCGAGCAATTGCGGATTCACACCTTGTGCTTACAGTTTCCCATGAC 4007  
FRI\_Pu-2-23 CGTTGCACTG---CTCGAGCAATTGCGGATTCACACCTTGTGCTTACAGTTTCCCATGAC 4010  
FRI\_NFA-10 CGTTGCACTG---CTCGAGCAATTGCGGATTCACACCTTGTGCTTACAGTTTCCCATGAC 4010  
FRI\_Cvi-0 CGTTGCACTG---CTCGAGCAATTGCGGATTCACACCTTGTGCTTACAGTTTCCCATGAC 4010  
FRI\_Zdr-6 CGTTGCACTG---CTCGAGCAATTGCGGATTCACACCTTGTGCTTACAGTTTCCCATGAC 4010  
\* \* \* \* \* \* \* \* \* \* \* \* \* \* \* \* \*

FRI\_An-1 ACAAGCTTTTCCATGAATGTATTTATGTCCGCCCTTCTATCTTTCTTGAGGAAGATGAAT 4029  
FRI\_Pro-0 ACAAGCTTTTCCATGAATGTATTTATGTCCGCCCTTCTATCTTTCTTGAGGAAGATGAAT 4031  
FRI\_Bål-2 ----- 3986  
FRI\_St-0 ACAAGCTTTTCCATGAATGTATTTATGTCCGCCCTTCTATCTTTCTTGAGGAAGATGAAT 3996  
FRI\_Bg-2 ACAAGCTTTTCCATGAATGTATTTATGTCCGCCCTTCTATCTTTCTTGAGGAAGATGAAT 4064  
FRI\_C24 ACAAGCTTTTCCATGAATGTATTTATGTCCGCCCTTCTATCTTTCTTGAGGAAGA----- 4060  
FRI\_Van-0 ACAAGCTTTTCCATGAATGTATTTATGTCCGCCCTTCTATCTTTCTTGAGGAAGATGAAT 4065  
FRI\_Ull-2-3 ACAAGCTTTTCCATGAATGTATTTATGTCCGCCCTTCTATCTTTCTTGAGGAAGATGAAT 4064  
FRI\_Lip-0 ACAAGCTTTTCCATGAATGTATTTATGTCCGCCCTTCTATCTTTCTTGAGGAAGATGAAT 4068  
FRI\_NFA-8 ACAAGCTTTTCCATGAATGTATTTATGTCCGCCCTTCTATCTTTCTTGAGGAAGATGAAT 4068  
FRI\_Edi-0 ACAAGCTTTTCCATGAATGTATTTATGTCCGCCCTTCTATCTTTCTTGAGGAAGATGAAT 4067  
FRI\_Ren-1 ACAAGCTTTTCCATGAATGTATTTATGTCCGCCCTTCTATCTTTCTTGAGGAAGATGAAT 3696  
FRI\_Nok-3 ACAAGCTTTTCCATGAATGTATTTATGTCCGCCCTTCTATCTTTCTTGAGGAAGATGAAT 4067  
FRI\_Sha ACAAGCTTTTCCATGAATGTATTTATGTCCGCCCTTCTATCTTTCTTGAGGAAGATGAAT 4067  
FRI\_Wa-1 ACAAGCTTTTCCATGAATGTATTTATGTCCGCCCTTCTATCTTTCTTGAGGAAGATGAAT 4067  
FRI\_Spr-1-6 ACAAGCTTTTCCATGAATGTATTTATGTCCGCCCTTCTATCTTTCTTGAGGAAGATGAAT 4067  
FRI\_Bil-7 ACAAGCTTTTCCATGAATGTATTTATGTCCGCCCTTCTATCTTTCTTGAGGAAGATGAAT 4067  
FRI\_Alc-0 ACAAGCTTTTCCATGAATGTATTTATGTCCGCCCTTCTATCTTTCTTGAGGAAGATGAAT 4067

|             |                                                              |      |
|-------------|--------------------------------------------------------------|------|
| FRI_Pu-2-23 | ACAAGCTTTTCCATGAATGTATTTATGTCCGCCTTCTTATCTTTCTTGAGGAAGATGAAT | 4070 |
| FRI_NFA-10  | ACAAGCTTTTCCATGAATGTATTTATGTCCGCCTTCTTATCTTTCTTGAGGAAGATGAAT | 4070 |
| FRI_Cvi-0   | ACAAGCTTTTCCATGAATGTATTTATGTCCGCCTTCTTATCTTTCTTGAGGAAGATGAAT | 4070 |
| FRI_Zdr-6   | ACAAGCTTTTCCATGAATGTATTTATGTCCGCCTTCTTATCTTTCTTGAGGAAGATGAAT | 4070 |

|             |    |      |
|-------------|----|------|
| FRI_An-1    | TC | 4031 |
| FRI_Pro-0   | TC | 4033 |
| FRI_Bå1-2   | -- | 3986 |
| FRI_St-0    | TC | 3998 |
| FRI_Bg-2    | TC | 4066 |
| FRI_C24     | -- | 4060 |
| FRI_Van-0   | TC | 4067 |
| FRI_U11-2-3 | TC | 4066 |
| FRI_Lip-0   | T- | 4069 |
| FRI_NFA-8   | TC | 4070 |
| FRI_Edi-0   | TC | 4069 |
| FRI_Ren-1   | TC | 3698 |
| FRI_Nok-3   | TC | 4069 |
| FRI_Sha     | TC | 4069 |
| FRI_Wa-1    | TC | 4069 |
| FRI_Spr-1-6 | TC | 4069 |
| FRI_Bil-7   | TC | 4069 |
| FRI_Alc-0   | TC | 4069 |
| FRI_Pu-2-23 | TC | 4072 |
| FRI_NFA-10  | TC | 4072 |
| FRI_Cvi-0   | TC | 4072 |
| FRI_Zdr-6   | TC | 4072 |
